# Supplementary material for: Functional profiling of adenylation domains in nonribosomal peptide synthetases by competitive activity-based protein profiling
Source: Royal Society of Chemistry journal article supplement (doi:10.1039/c5cc04953a), 2015-01-01

Supporting Information

**Functional profiling of adenylation domains in nonribosomal peptide synthetases  
by competitive activity-based protein profiling**

Shota Kasai,<sup>#</sup> Sho Konno,<sup>#</sup> Fumihiro Ishikawa,<sup>\*</sup> and Hideaki Kakeya<sup>\*</sup>

*Department of System Chemotherapy and Molecular Sciences, Division of Bioinformatics and  
Chemical Genomics, Graduate School of Pharmaceutical Sciences, Kyoto University, Sakyo,  
Kyoto 606-8501, Japan*

<sup>\*</sup>Correspondence and request for materials should be directed via email to  
F. Ishikawa (fishika@pharm.kyoto-u.ac.jp) or H. Kakeya (scseigyohisyo@pharm.kyoto-u.ac.jp).

<sup>#</sup>These authors contributed equally to this work.

| <b>Contents:</b>                                             | <b>Page</b> |
|--------------------------------------------------------------|-------------|
| Supplementary Figure S1                                      | S3          |
| Supplementary Figure S2                                      | S4          |
| Supplementary Figure S3                                      | S5          |
| Supplementary Figure S4                                      | S6          |
| Supplementary Figure S5                                      | S7          |
| Supplementary Figure S6                                      | S8          |
| Supplementary Figure S7                                      | S9          |
| Supplementary Figure S8                                      | S9          |
| Supplementary Figure S9                                      | S10         |
| Supplementary Figure S10                                     | S10         |
| Supplementary Figure S11                                     | S10         |
| Supplementary Figure S12                                     | S11         |
| Supplementary Figure S13                                     | S11         |
| Supplementary Figure S14                                     | S12         |
| Supplementary Figure S15                                     | S13         |
| Supplementary Figure S16                                     | S14         |
| Supplementary Figure S17                                     | S15         |
| Supplementary Figure S18                                     | S16         |
| Supplementary Figure S19                                     | S17         |
| Supplementary Figure S20                                     | S18         |
| Supplementary Figure S21                                     | S19         |
| Supplementary Figure S22                                     | S20         |
| Supplementary Figure S23                                     | S21         |
| Supplementary Table S1                                       | S22         |
| Supplementary Table S2                                       | S22         |
| Supplementary Table S3                                       | S23         |
| Supplementary Table S4                                       | S23         |
| Supplementary Table S5                                       | S24         |
| Supplementary Table S6                                       | S25         |
| Supplementary Table S7                                       | S25         |
| Supplementary Scheme S1                                      | S26         |
| Chemical Synthetic Procedures                                | S26-S45     |
| Chemical Biology Procedures                                  | S45-S48     |
| References                                                   | S49         |
| Copies of <sup>1</sup> H-NMR and <sup>13</sup> C-NMR spectra | S50-S79     |

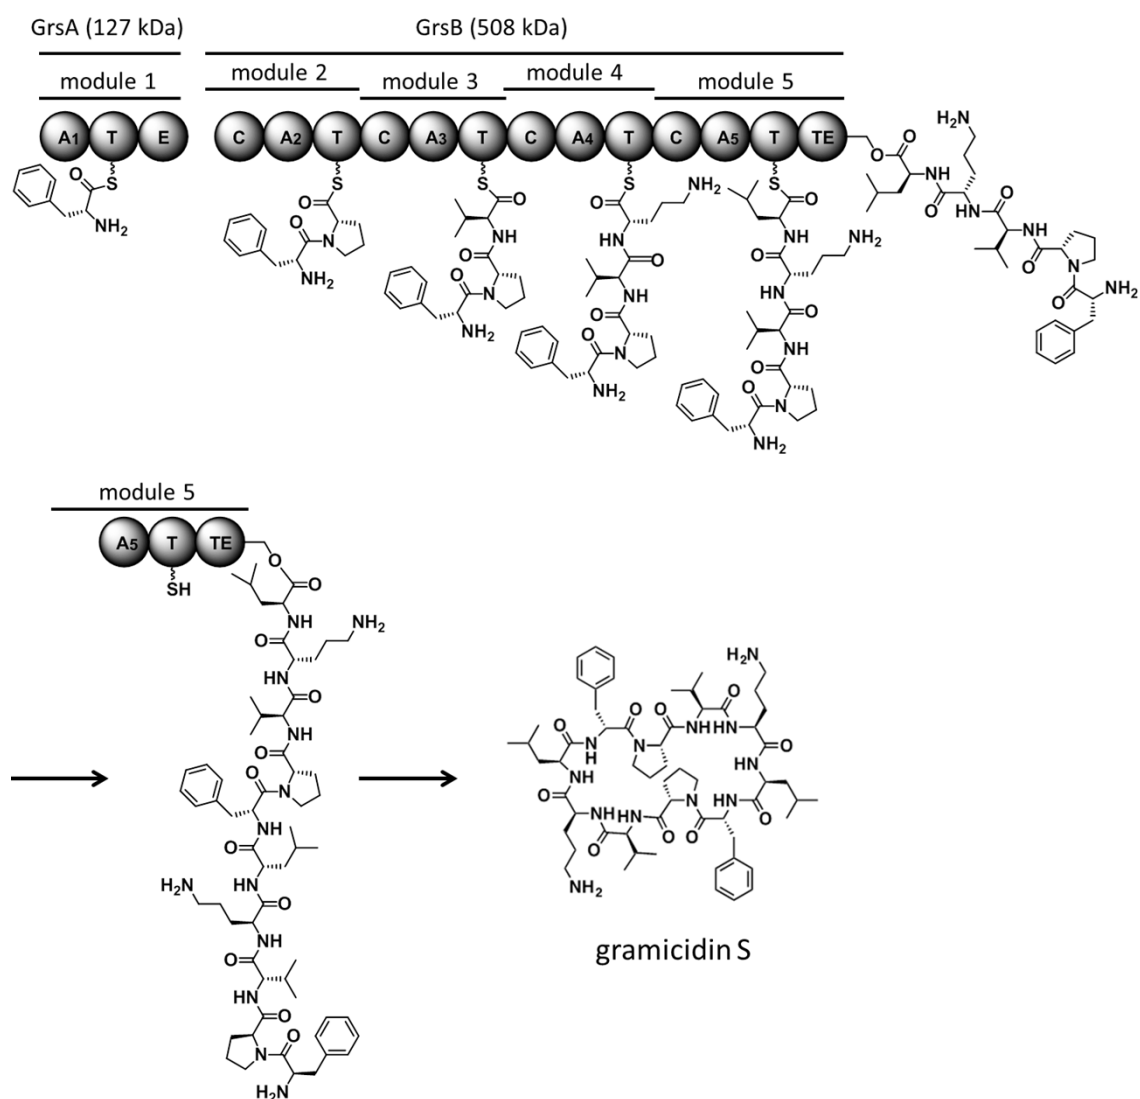

**Figure S1. Nonribosomal peptide synthesis of the antibiotic gramicidin S.** Modules are comprised of thiolation (T), adenylation (A) [A1: L-Phe; A2: L-Pro; A3: L-Val; A4: L-Orn; A5: L-Leu specific A-domains], epimerization (E), condensation (C), and thioesterase (TE) domains.

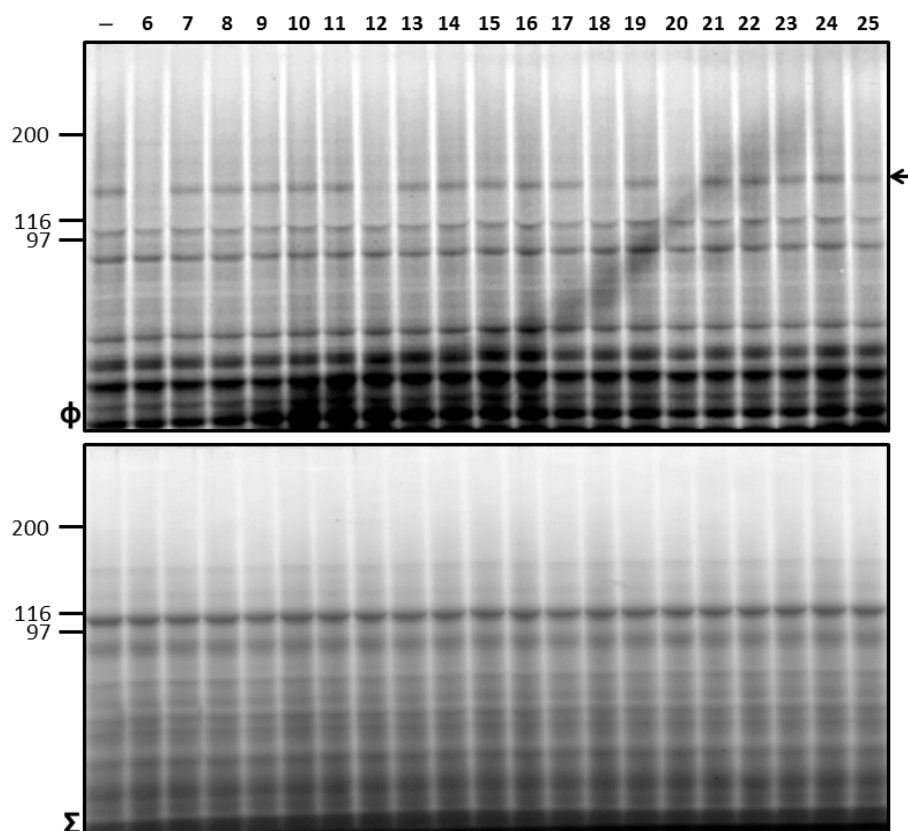

**Figure S2. Full images of SDS-PAGE gels from Figure 3a.** Competitive ABPP of **6–25** towards the A-domain of endogenous GrsA. Assessment of the inhibition potency (100  $\mu$ M compound) in the *A. migulanus* ATCC 9999 proteome with probe **1** (1  $\mu$ M). The top image ( $\Phi$ ) depicts the fluorescence observed with  $\lambda_{\text{ex}} = 532$  nm and  $\lambda_{\text{em}} = 580$  nm and the bottom ( $\Sigma$ ) denotes total protein content by staining with Coomassie (Colloidal Coomassie Blue Stain).

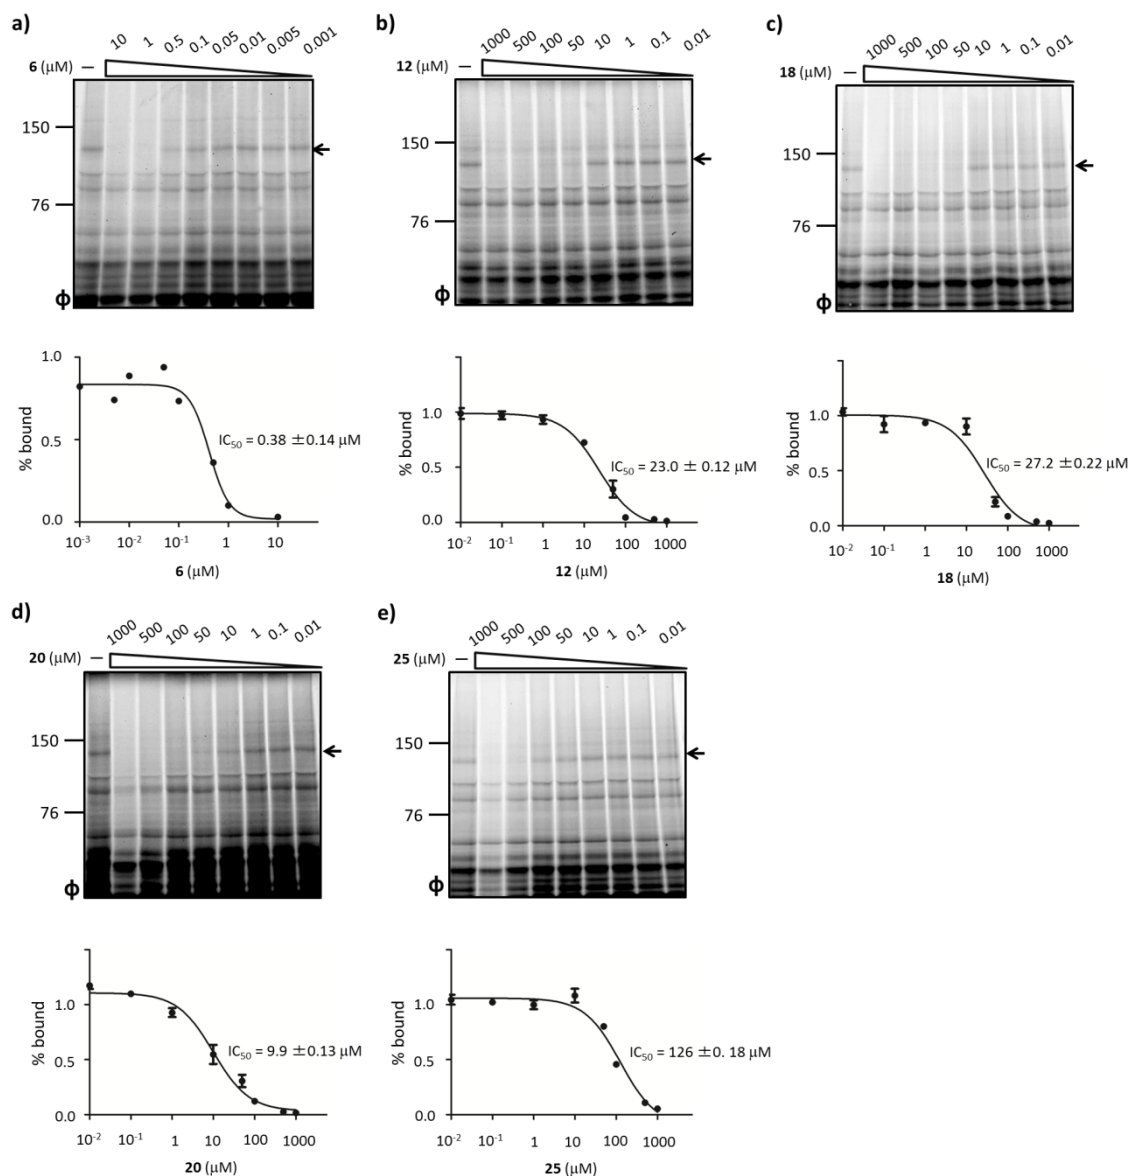

**Figure S3. Full images of SDS-PAGE gels from Figure 3b.** Competitive ABPP of 6–25 towards the A-domain of endogenous GrsA. Dose–response competitive ABPP experiments to assess the selectivity of (a) 6, (b) 12, (c) 18, (d) 20, and (e) 25 towards the A-domain of GrsA in the *A. migulanus* ATCC 9999 proteome with probe 1 (1  $\mu$ M). The image ( $\Phi$ ) depicts the fluorescence observed with  $\lambda_{ex} = 532$  nm and  $\lambda_{em} = 580$  nm.

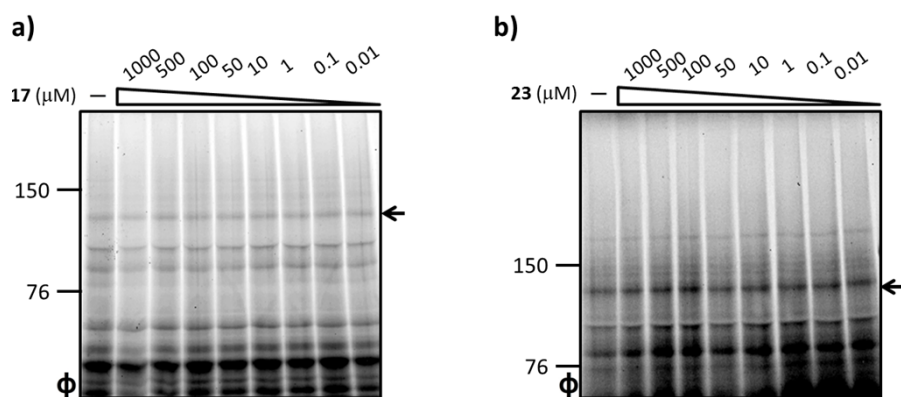

**Figure S4. Competitive ABPP of 17 and 23 towards the A-domain of endogenous GrsA.**

Dose–response competitive ABPP experiments to assess the selectivity of (a) **17** and (b) **23** towards the A-domain of GrsA in the *A. migulanus* ATCC 9999 proteome with probe **1**. The *A. migulanus* ATCC 9999 lysate (2.0 mg/mL) was pre-incubated with inhibitors **17** and **23** (10 nM to 1 mM) before the addition of 1 μM of probe **1**. The image (Φ) depicts the fluorescence observed with  $\lambda_{\text{ex}} = 532$  nm and  $\lambda_{\text{em}} = 580$  nm.

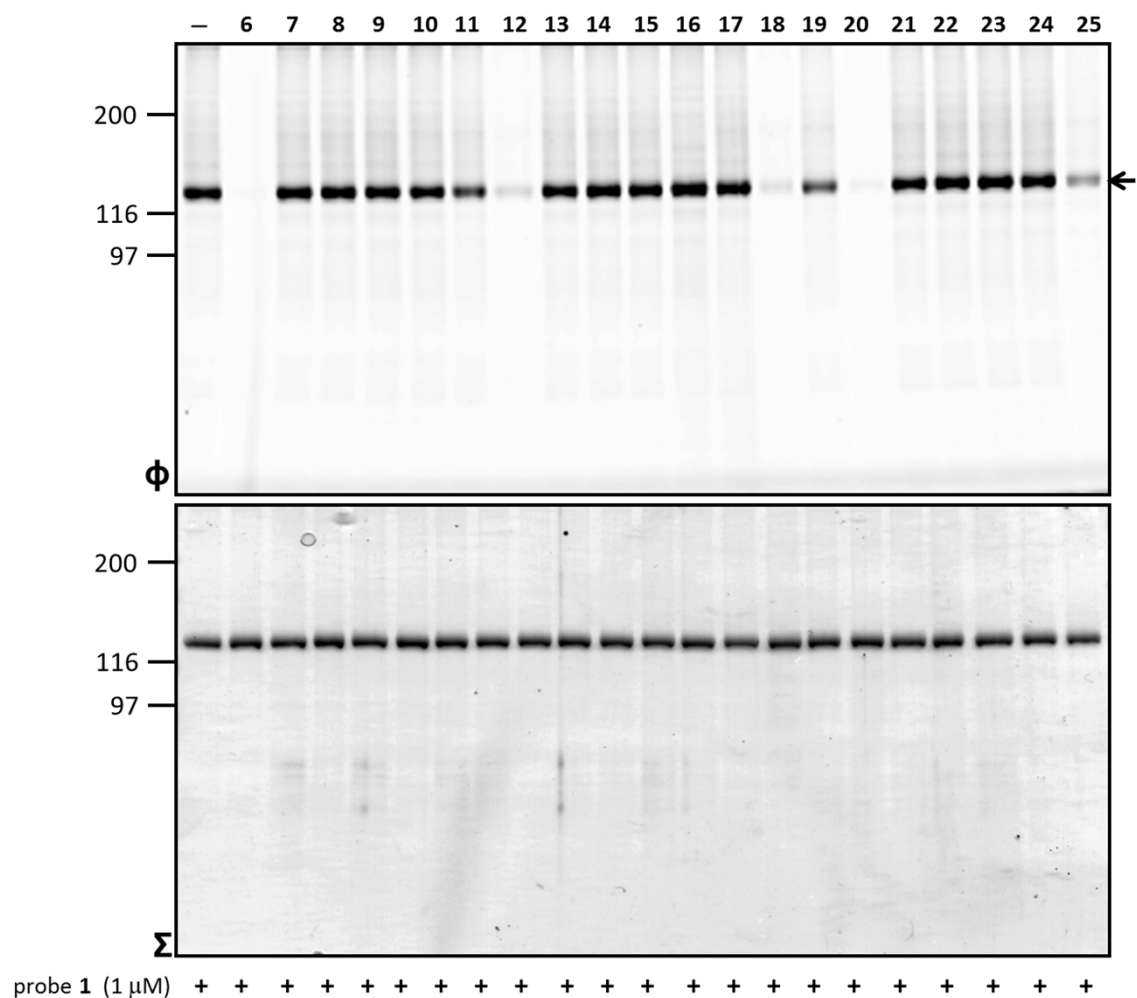

**Figure S5. Competitive ABPP of 6–25 towards the A-domain of recombinant GrsA.** Assessment of the inhibition potency (100  $\mu$ M compound) in the A-domain of GrsA (1  $\mu$ M) with probe 1 (1  $\mu$ M). The top image ( $\Phi$ ) depicts the fluorescence observed with  $\lambda_{\text{ex}} = 532$  nm and  $\lambda_{\text{em}} = 580$  nm and the bottom ( $\Sigma$ ) denotes total protein content by staining with Coomassie (Colloidal Coomassie Blue Stain).

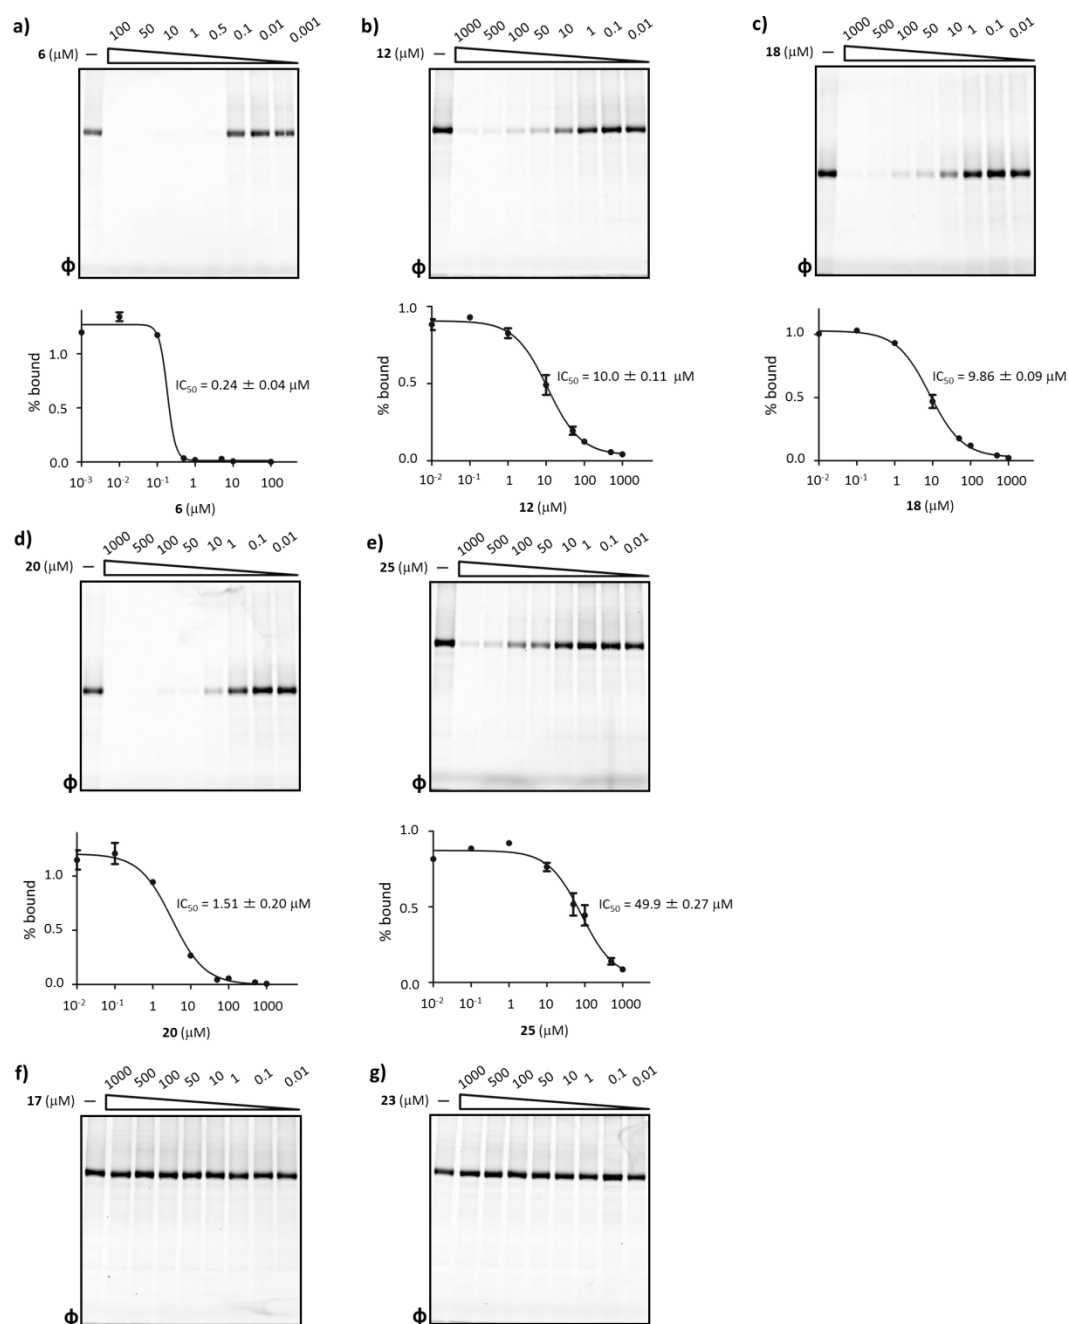

**Figure S6. Competitive ABPP of 6, 12, 18, 20, 25, 17, and 23 towards the A-domain of recombinant GrsA.** Dose–response competitive ABPP experiments to assess the selectivity of (a) 6, (b) 12, (c) 18, (d) 20, (e) 25, (f) 17, and (g) 23 towards the A-domain of GrsA with probe 1. Recombinant GrsA (1 μM) was pre-incubated with inhibitors 6 (1 nM to 100 μM), 12 (10 nM to 1 mM), 18 (10 nM to 1 mM), 20 (10 nM to 1 mM), 25 (10 nM to 1 mM), 17 (10 nM to 1 mM), and 23 (10 nM to 1 mM) before the addition of 1 μM of probe 1. The image (Φ) depicts the fluorescence observed with  $\lambda_{ex} = 532$  nm and  $\lambda_{em} = 580$  nm.

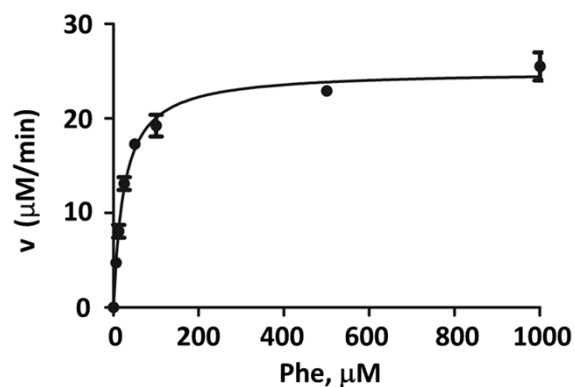

**Figure S7. Steady-state kinetics of GrsA with L-Phe.** Each reaction contained 50 nM *holo*-GrsA, 20 mM Tris (pH 8.0), 2.5 mM ATP, 1 mM MgCl<sub>2</sub>, 1 mM TCEP, 150 mM hydroxylamine (pH 7.0), 0.1 U purine nucleoside phosphorylase, 0.04 U inorganic pyrophosphatase, 0.2 mM MesG, and 6.25–1000 μM L-Phe.

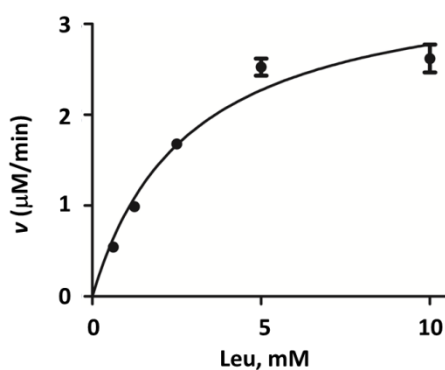

**Figure S8. Steady-state kinetics of GrsA with L-Leu.** Each reaction contained 700 nM *holo*-GrsA, 20 mM Tris (pH 8.0), 2.5 mM ATP, 1 mM MgCl<sub>2</sub>, 1 mM TCEP, 150 mM hydroxylamine (pH 7.0), 0.1 U purine nucleoside phosphorylase, 0.04 U inorganic pyrophosphatase, 0.2 mM MesG, and 0.625–10 mM L-Leu.

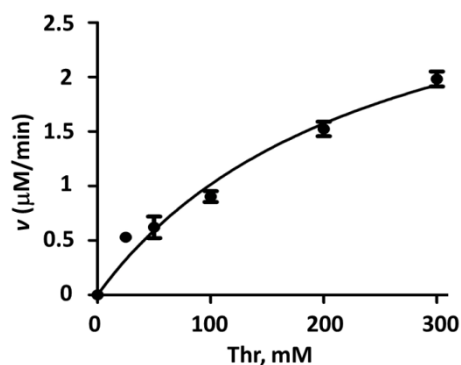

**Figure S9. Steady-state kinetics of GrsA with L-Thr.** Each reaction contained 1.4  $\mu\text{M}$  *holo*-GrsA, 20 mM Tris (pH 8.0), 2.5 mM ATP, 1 mM  $\text{MgCl}_2$ , 1 mM TCEP, 150 mM hydroxylamine (pH 7.0), 0.1 U purine nucleoside phosphorylase, 0.04 U inorganic pyrophosphatase, 0.2 mM MesG, and 25–300 mM L-Thr.

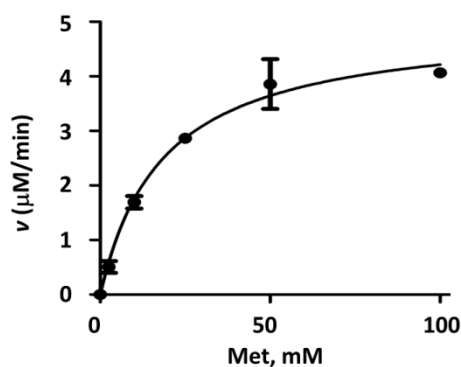

**Figure S10. Steady-state kinetics of GrsA with L-Met.** Each reaction contained 140 nM *holo*-GrsA, 20 mM Tris (pH 8.0), 2.5 mM ATP, 1 mM  $\text{MgCl}_2$ , 1 mM TCEP, 150 mM hydroxylamine (pH 7.0), 0.1 U purine nucleoside phosphorylase, 0.04 U inorganic pyrophosphatase, 0.2 mM MesG, and 2.5–100 mM L-Met.

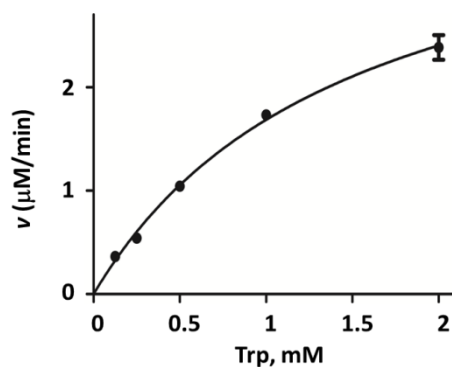

**Figure S11. Steady-state kinetics of GrsA with L-Trp.** Each reaction contained 700 nM *holo*-GrsA, 20 mM Tris (pH 8.0), 2.5 mM ATP, 1 mM MgCl<sub>2</sub>, 1 mM TCEP, 150 mM hydroxylamine (pH 7.0), 0.1 U purine nucleoside phosphorylase, 0.04 U inorganic pyrophosphatase, 0.2 mM MesG, and 0.125–2.0 mM L-Trp.

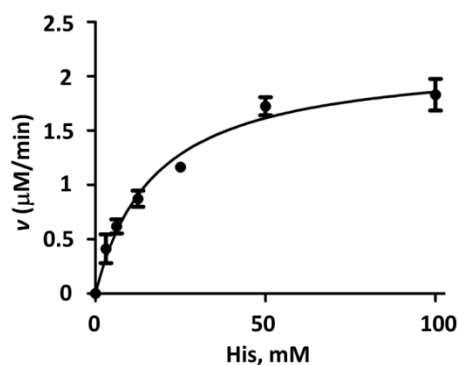

**Figure S12. Steady-state kinetics of GrsA with L-His.** Each reaction contained 1.4 μM *holo*-GrsA, 20 mM Tris (pH 8.0), 2.5 mM ATP, 1 mM MgCl<sub>2</sub>, 1 mM TCEP, 150 mM hydroxylamine (pH 7.0), 0.1 U purine nucleoside phosphorylase, 0.04 U inorganic pyrophosphatase, 0.2 mM MesG, and 3.125–100 mM L-His.

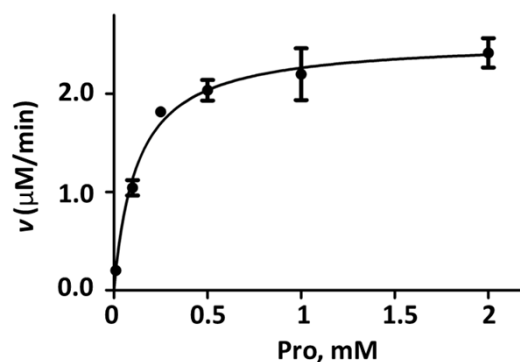

**Figure S13. Steady-state kinetics of TycB1 with L-Pro.** Each reaction contained 400 nM *holo*-TycB1, 20 mM Tris (pH 8.0), 2.5 mM ATP, 1 mM MgCl<sub>2</sub>, 1 mM TCEP, 150 mM hydroxylamine (pH 7.0), 0.1 U purine nucleoside phosphorylase, 0.04 U inorganic pyrophosphatase, 0.2 mM MesG, and 10–2000 μM L-Pro. Velocities were fit to the Michaelis-Menten equation.

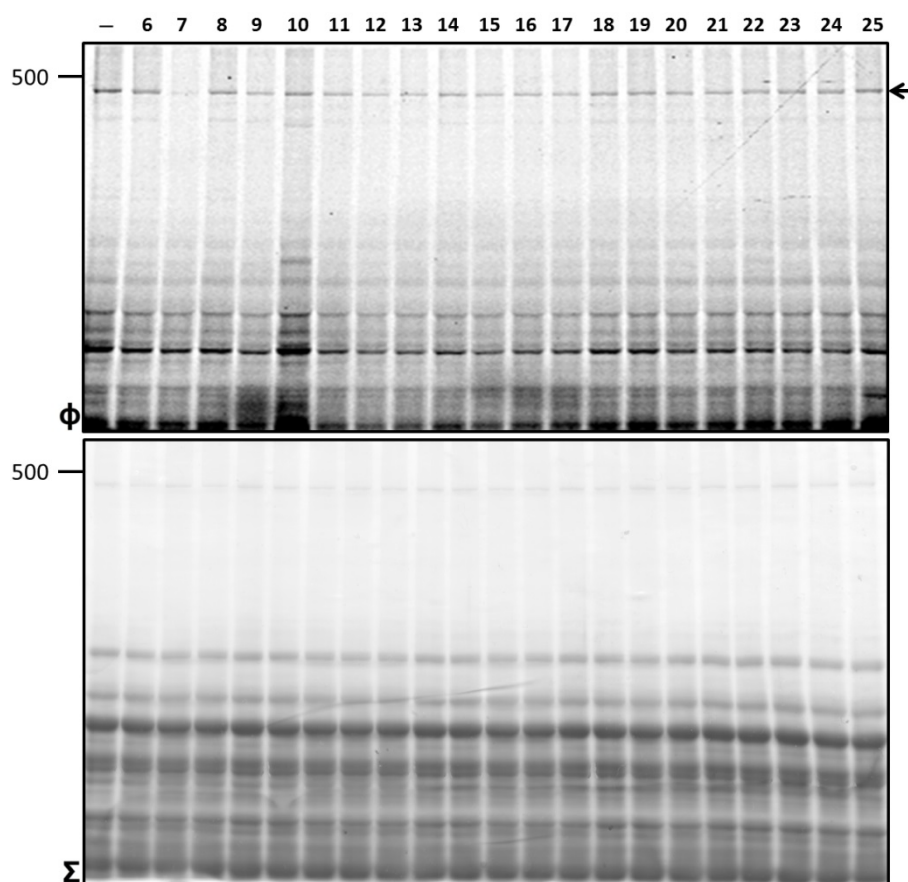

**Figure S14. Full images of SDS-PAGE gels from Figure 4a.** Competitive ABPP of **6–25** toward the A-domains of endogenous GrsB in the *A. migulanus* ATCC 5759 proteome. Assessment of the inhibition potency (100  $\mu$ M compound) towards the Pro-activating domain of GrsB with probe **2** (1  $\mu$ M). The top image ( $\Phi$ ) depicts the fluorescence observed with  $\lambda_{\text{ex}} = 532$  nm and  $\lambda_{\text{em}} = 580$  nm and the bottom ( $\Sigma$ ) denotes total protein content by staining with Coomassie (Colloidal Coomassie Blue Stain).

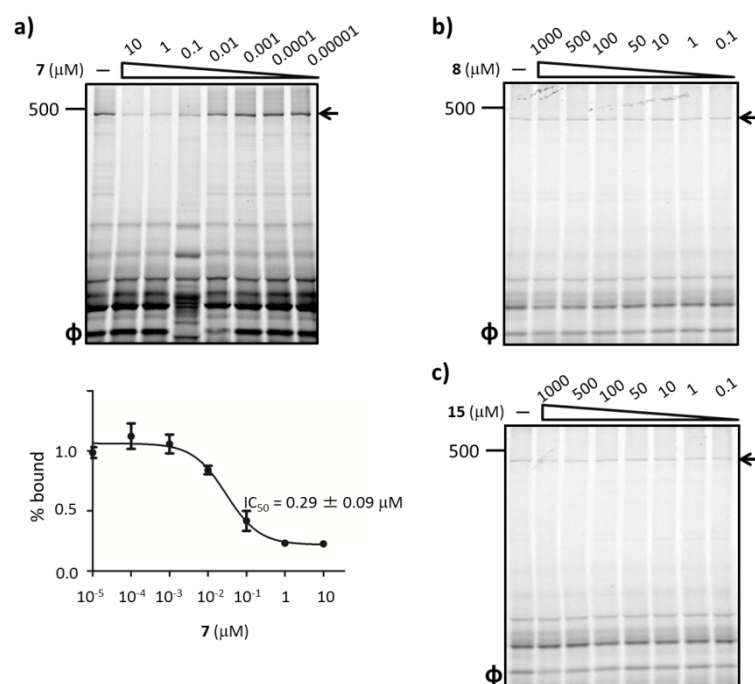

**Figure S15. Dose–response competitive ABPP of 7, 8, and 15 towards the Pro-activating domain of endogenous GrsB.** The *A. migulanus* DSM 5759 lysate (2.0 mg/mL) was pre-incubated with **7** (0.01 nM to 10 μM), **8** (0.1 to 1000 μM), and **15** (0.1 to 1000 μM) before the addition of 1 μM of probe **2**. The image ( $\Phi$ ) depicts the fluorescence observed with  $\lambda_{ex} = 532$  nm and  $\lambda_{em} = 580$  nm.

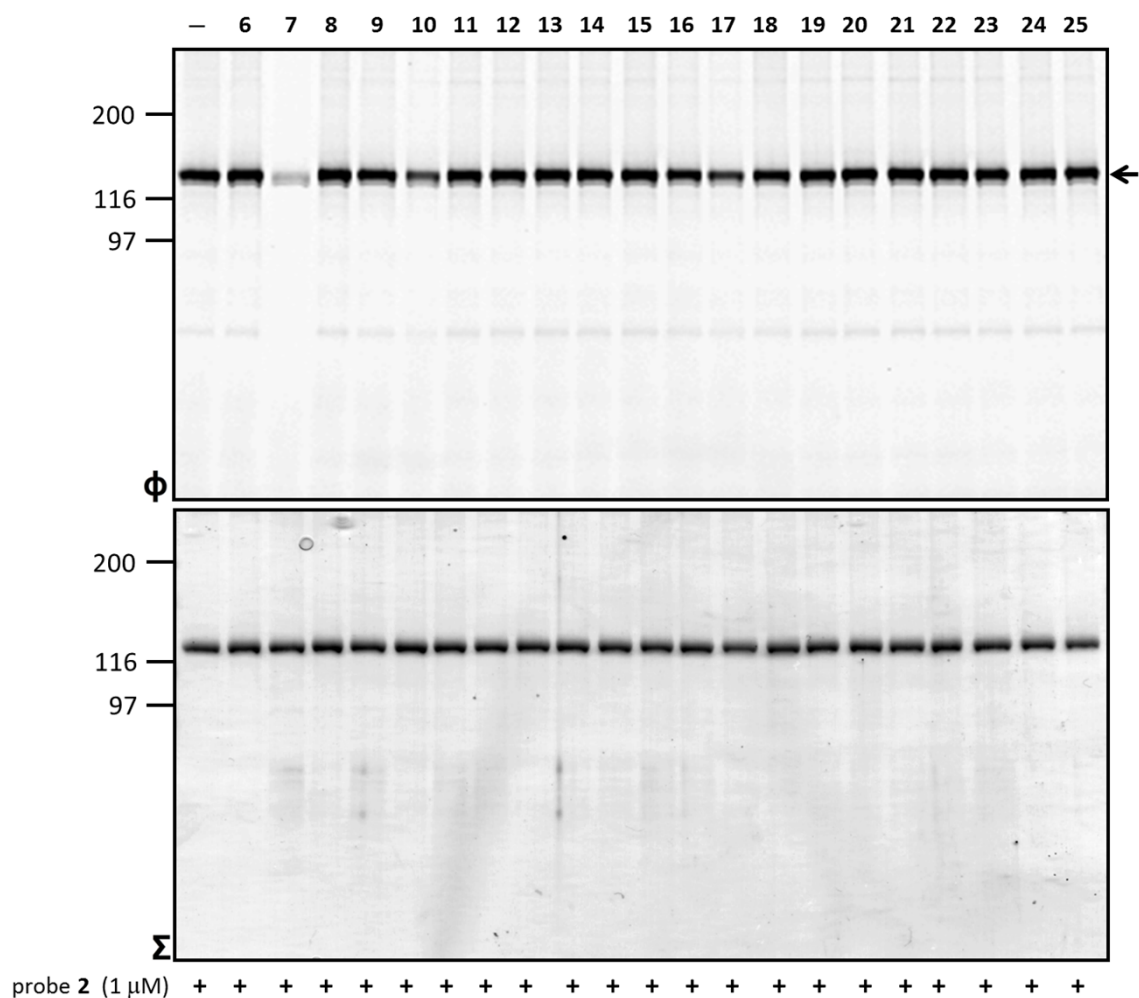

**Figure S16. Competitive ABPP of 6–25 toward the A-domains of recombinant TycB1.** Assessment of the inhibition potency (100  $\mu$ M compound) towards the Pro-activating domain of TycB1 (1  $\mu$ M) with probe 2 (1  $\mu$ M). The top image ( $\Phi$ ) depicts the fluorescence observed with  $\lambda_{\text{ex}} = 532$  nm and  $\lambda_{\text{em}} = 580$  nm and the bottom ( $\Sigma$ ) denotes total protein content by staining with Coomassie (Colloidal Coomassie Blue Stain).

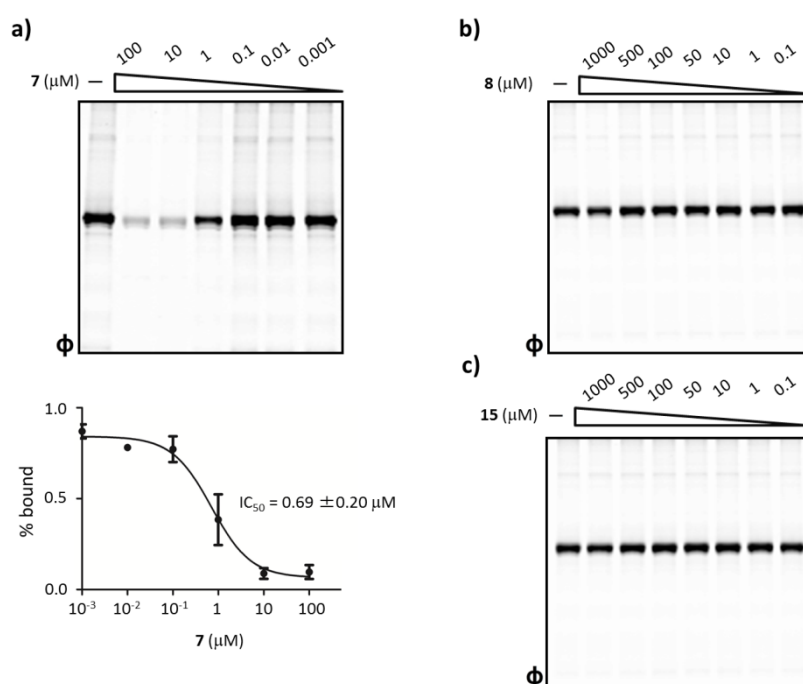

**Figure S17. Competitive ABPP of 7, 8, and 15 towards the Pro-activating domain of recombinant TycB1.** Dose–response competitive ABPP experiments to assess the selectivity of (a) 7, (b) 8, and (c) 15 towards the A-domain of TycB1 with probe 2. Recombinant TycB1 (1  $\mu\text{M}$ ) was pre-incubated with inhibitors 7 (1 nM to 100  $\mu\text{M}$ ), 8 (0.1  $\mu\text{M}$  to 1000  $\mu\text{M}$ ), and 15 (0.1  $\mu\text{M}$  to 1000  $\mu\text{M}$ ) before the addition of 1  $\mu\text{M}$  of probe 2. The image ( $\Phi$ ) depicts the fluorescence observed with  $\lambda_{\text{ex}} = 532 \text{ nm}$  and  $\lambda_{\text{em}} = 580 \text{ nm}$ .

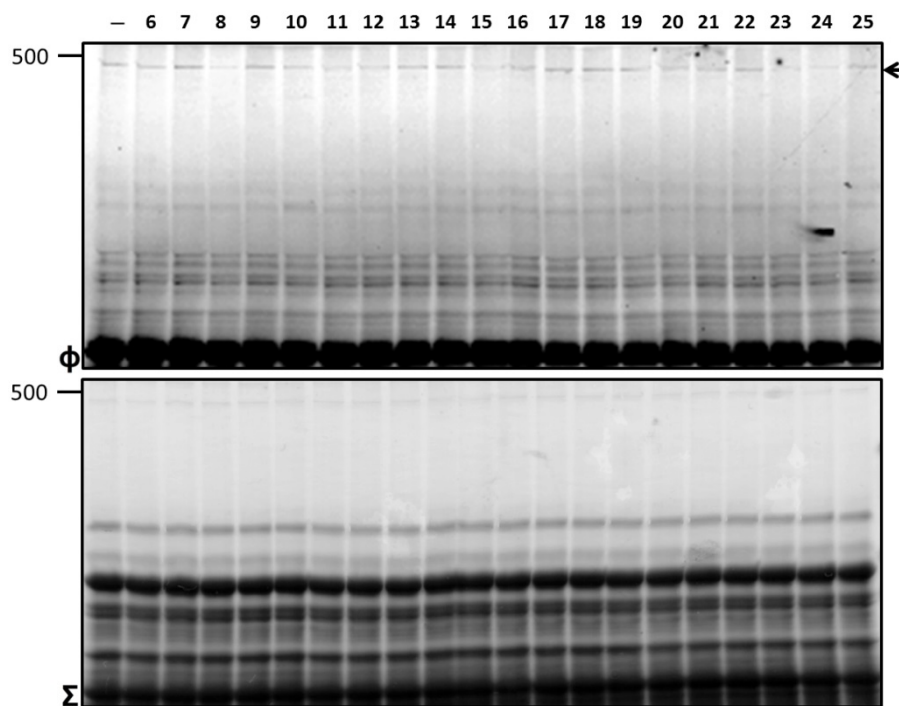

**Figure S18. Full images of SDS-PAGE gels from Figure 4b.** Competitive ABPP of **6–25** toward the A-domains of endogenous GrsB in the *A. migulanus* ATCC 5759 proteome. Assessment of the inhibition potency (100  $\mu$ M compound) towards the Orn-activating domain of GrsB with probe **3** (1  $\mu$ M). The top image ( $\Phi$ ) depicts the fluorescence observed with  $\lambda_{\text{ex}} = 532$  nm and  $\lambda_{\text{em}} = 580$  nm and the bottom ( $\Sigma$ ) denotes total protein content by staining with Coomassie (Colloidal Coomassie Blue Stain).

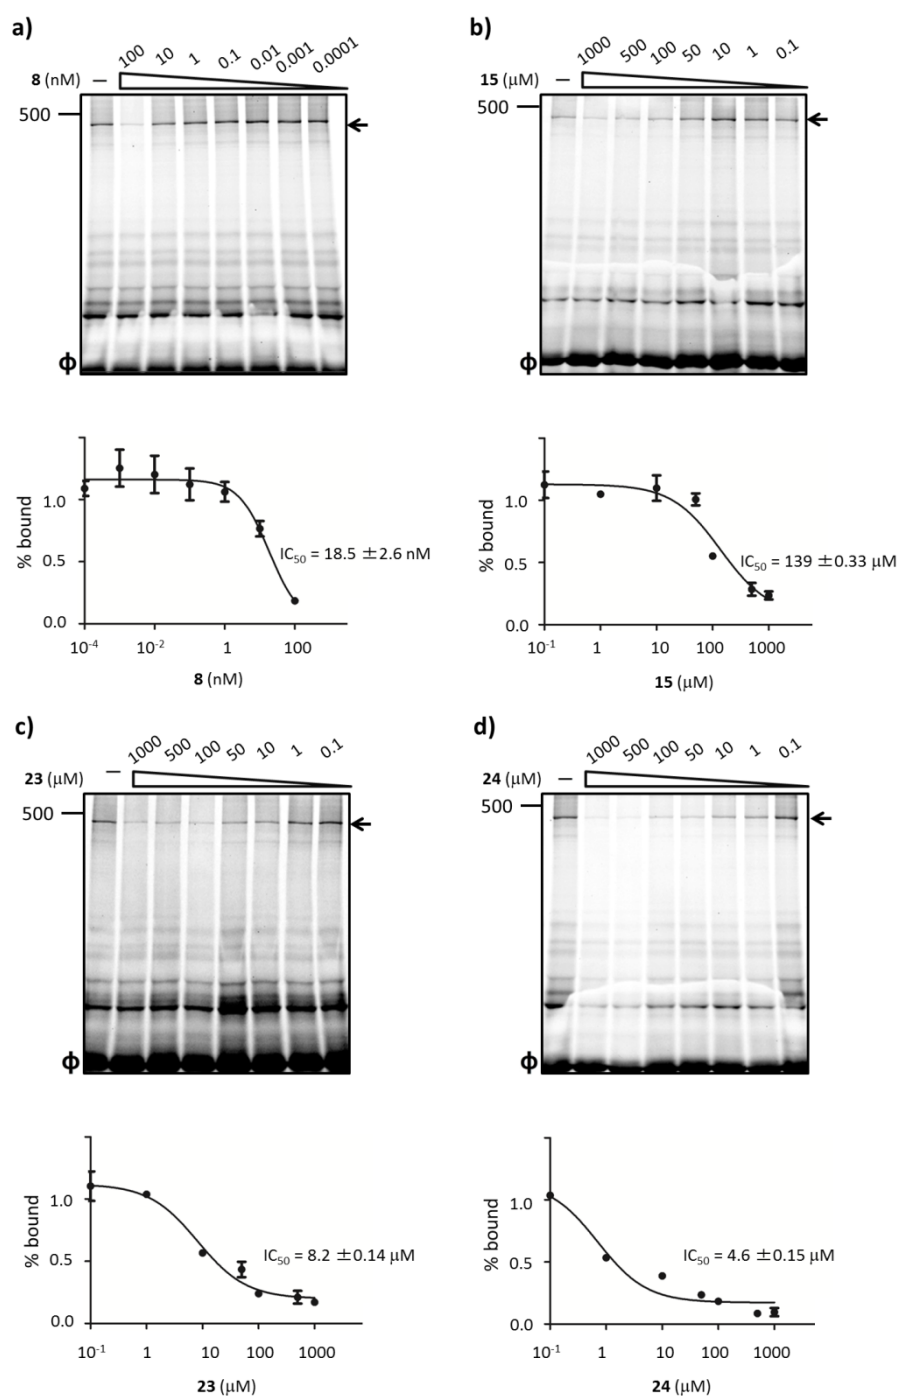

**Figure S19. Dose-response competitive ABPP of 8, 15, 23, and 24 towards the Orn-activating domain of endogenous GrsB.** The *A. migulanus* DSM 5759 lysate (2.0 mg/mL) was pre-incubated with (a) **8**, (b) **15**, (c) **23**, and (d) **24** at concentrations ranging from 0.1 pM to 1 mM (**8**: 0.1 pM to 100 nM; **15**: 100 nM to 1 mM; **23**: 100 nM to 1 mM; **24**: 100 nM to 1 mM) before the addition of 1 μM of probe **3**. The image (Φ) depicts the fluorescence observed with  $\lambda_{\text{ex}} = 532 \text{ nm}$  and  $\lambda_{\text{em}} = 580 \text{ nm}$ .

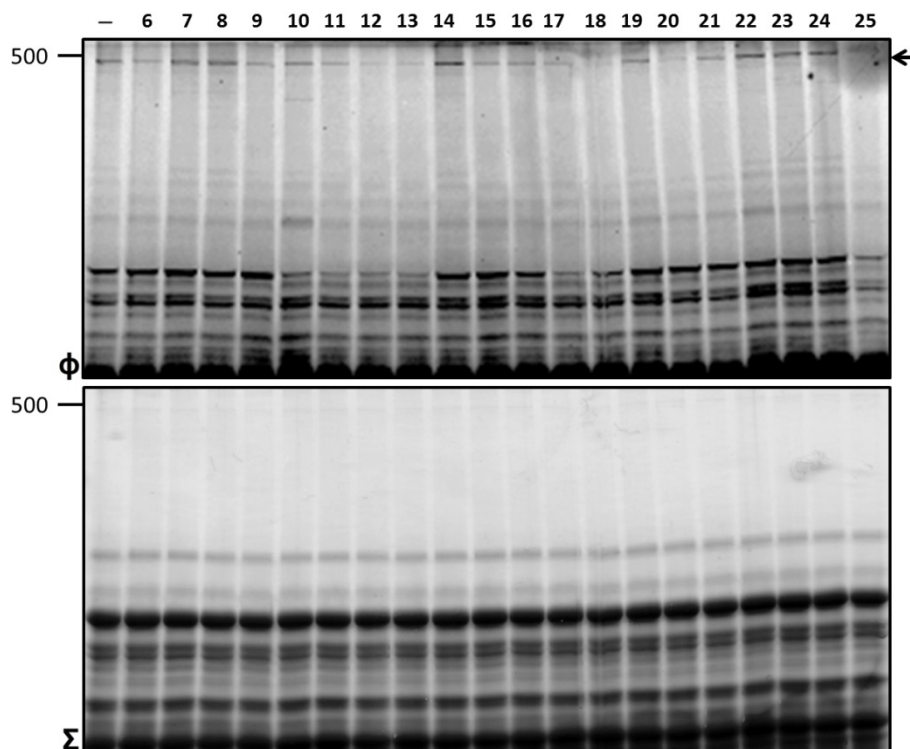

**Figure S20. Full images of SDS-PAGE gels from Figure 4c.** Competitive ABPP of 6–25 toward the A-domains of endogenous GrsB in the *A. migulanus* ATCC 5759 proteome. Assessment of the inhibition potency (100  $\mu$ M compound) towards the Val-activating domain of GrsB with probe 4 (1  $\mu$ M). The top image ( $\Phi$ ) depicts the fluorescence observed with  $\lambda_{\text{ex}} = 532$  nm and  $\lambda_{\text{em}} = 580$  nm and the bottom ( $\Sigma$ ) denotes total protein content by staining with Coomassie (Colloidal Coomassie Blue Stain).

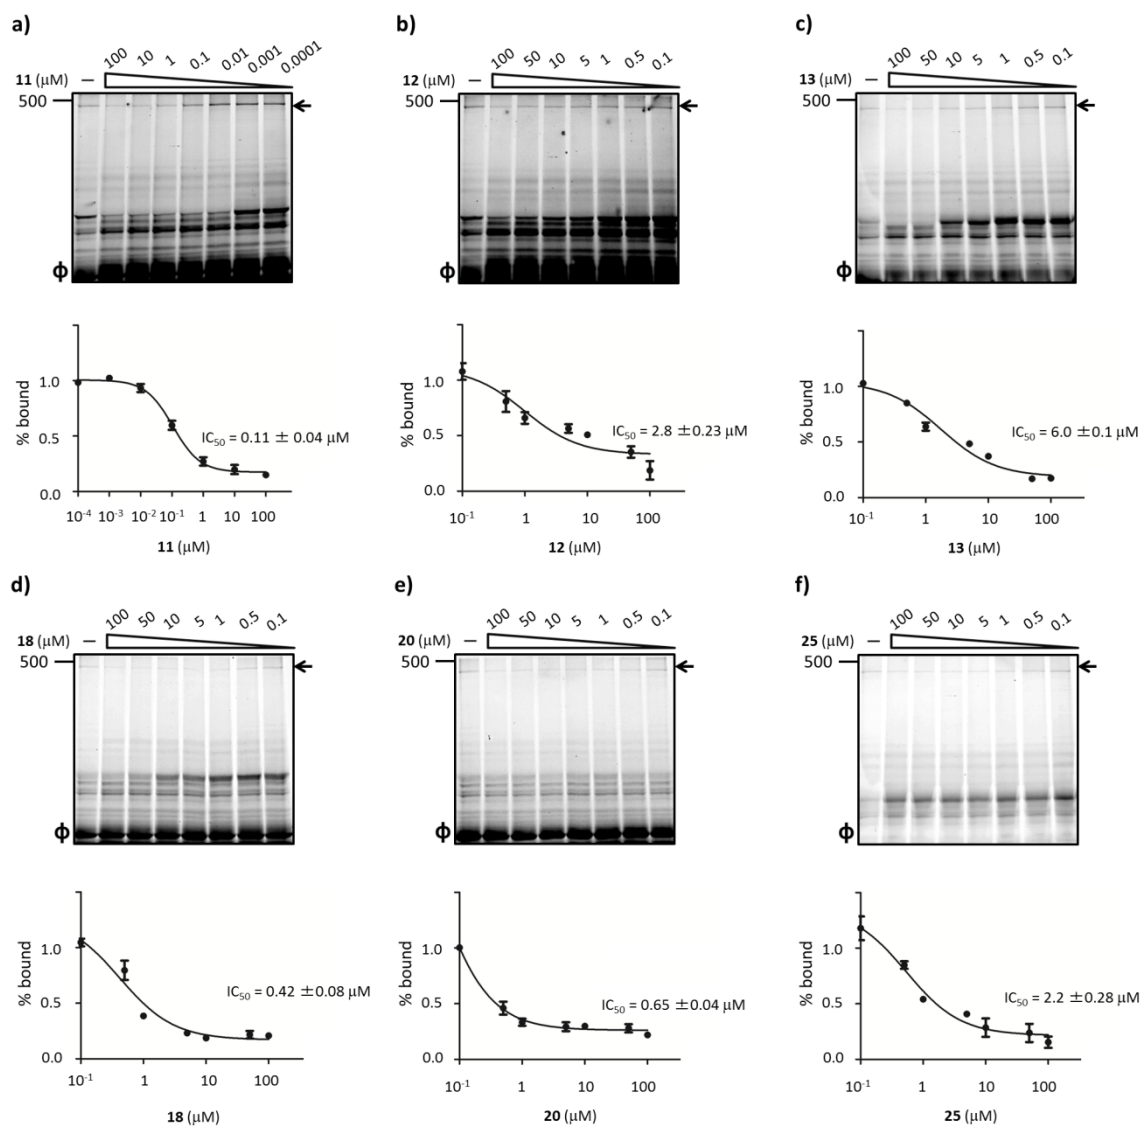

**Figure S21. Dose–response competitive ABPP of 11, 12, 13, 18, 20, and 25 towards the Val-activating domain of endogenous GrsB.** The *A. migulanus* DSM 5759 lysate (2.0 mg/mL) was pre-incubated with (a) 11, (b) 12, (c) 13, (d) 18, (e) 20, and (f) 25 at concentrations ranging from 0.1 nM to 100 μM (11: 0.1 nM to 100 μM; 12: 100 nM to 100 μM; 13: 100 nM to 100 μM; 20: 100 nM to 100 μM; 25: 100 nM to 100 μM) before the addition of 1 μM of probe 4. The image (Φ) depicts the fluorescence observed with  $\lambda_{\text{ex}} = 532$  nm and  $\lambda_{\text{em}} = 580$  nm.

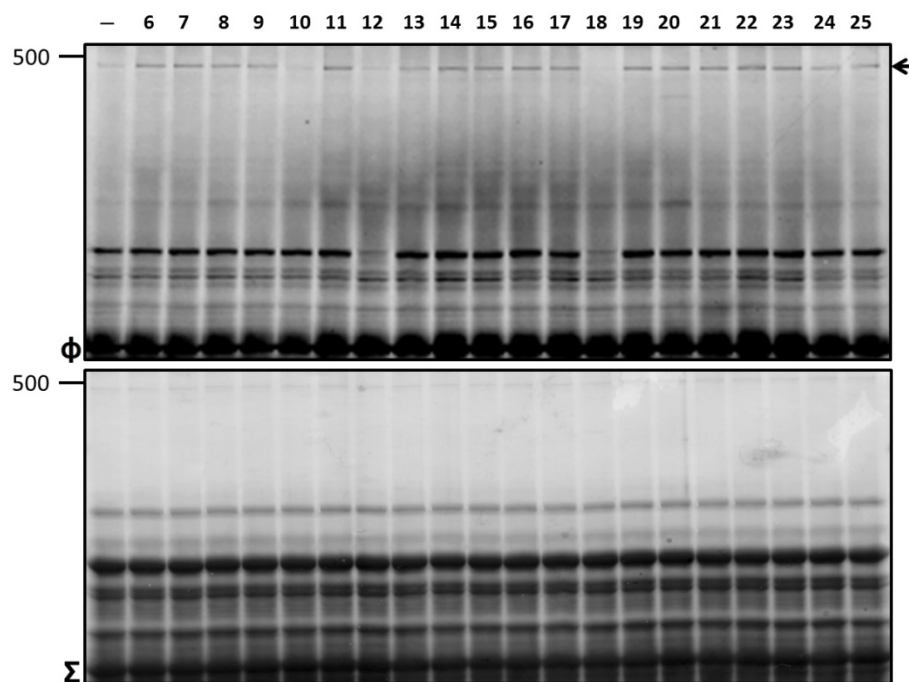

**Figure S22. Full images of SDS-PAGE gels from Figure 4d.** Competitive ABPP of **6–25** toward the A-domains of endogenous GrsB in the *A. migulanus* ATCC 5759 proteome. Assessment of the inhibition potency (100  $\mu$ M compound) towards the Leu-activating domain of GrsB with probe **5** (1  $\mu$ M). The top image ( $\Phi$ ) depicts the fluorescence observed with  $\lambda_{\text{ex}} = 532$  nm and  $\lambda_{\text{em}} = 580$  nm and the bottom ( $\Sigma$ ) denotes total protein content by staining with Coomassie (Colloidal Coomassie Blue Stain).

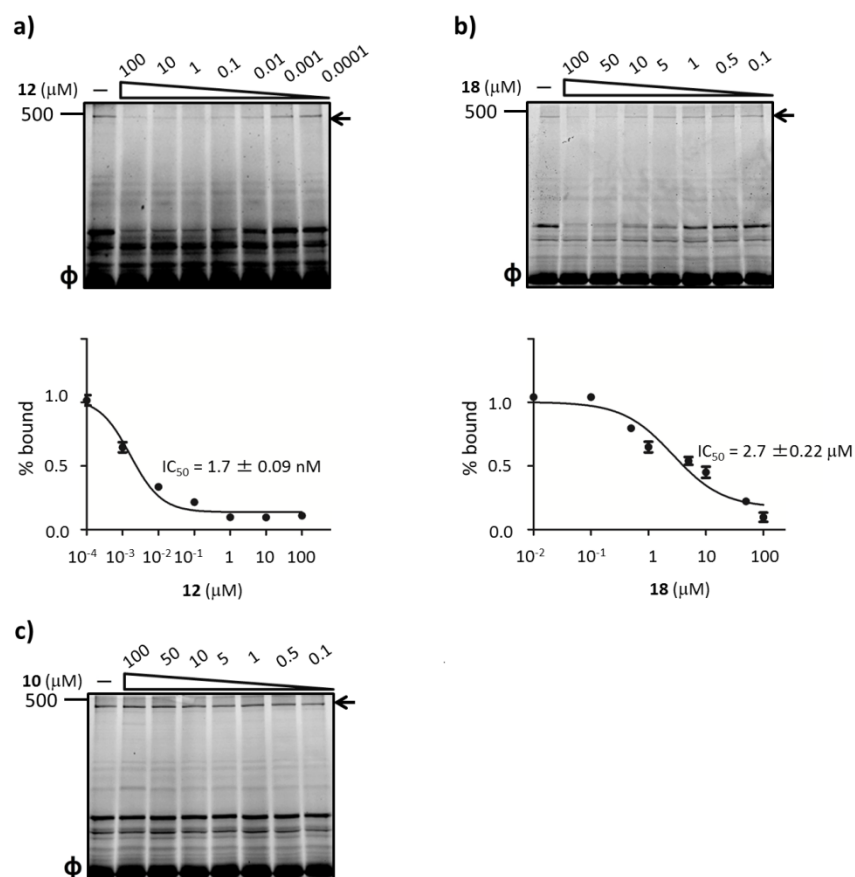

**Figure S23. Dose–response competitive ABPP of 10, 12, and 18 toward the Leu-activating domain of endogenous GrsB.** The *A. migulanus* DSM 5759 lysate (2.0 mg/mL) was pre-incubated with (a) **12**, (b) **18**, and (c) **10** at concentrations ranging from 0.1 nM to 1 mM (**12**: 0.1 nM to 100  $\mu\text{M}$ ; **18**: 100 nM to 100  $\mu\text{M}$ ; **10**: 100 nM to 100  $\mu\text{M}$ ) before the addition of 1  $\mu\text{M}$  of probe **5**. The image ( $\Phi$ ) depicts the fluorescence observed with  $\lambda_{\text{ex}} = 532 \text{ nm}$  and  $\lambda_{\text{em}} = 580 \text{ nm}$ .

**Table S1.** Catalytic parameters of the adenylation reaction catalyzed by the A-domain of GrsA.<sup>[a]</sup>

| substrate | $k_{\text{cat}}$ [min <sup>-1</sup> ] | $K_{\text{m}}$ [mM] | $k_{\text{cat}}/K_{\text{m}}$ [mM <sup>-1</sup> min <sup>-1</sup> ] |
|-----------|---------------------------------------|---------------------|---------------------------------------------------------------------|
| L-Phe     | 500 ± 12                              | 0.0248 ± 0.0023     | 20161 ± 5217                                                        |
| L-Leu     | 5.09 ± 0.40                           | 2.85 ± 0.57         | 1.79 ± 0.71                                                         |
| L-Thr     | 2.51 ± 0.39                           | 246 ± 69            | 0.011 ± 0.0007                                                      |
| L-Met     | 35.8 ± 2.1                            | 18.5 ± 3.3          | 1.92 ± 0.17                                                         |
| L-Trp     | 5.98 ± 0.43                           | 1.49 ± 0.19         | 4.02 ± 2.2                                                          |
| L-Lys     | n.d. <sup>[b]</sup>                   | n.d. <sup>[b]</sup> | n.d. <sup>[b]</sup>                                                 |
| L-His     | 1.56 ± 0.09                           | 17.5 ± 3.0          | 0.089 ± 0.0037                                                      |

[a] Catalytic parameters were determined by a coupled hydroxamate-MesG continuous spectrophotometric assay.<sup>1</sup> [b] not detected.

**Table S2.** Catalytic parameters of the adenylation reaction catalyzed by the A-domain of TycB1.<sup>[a]</sup>

| substrate | $k_{\text{cat}}$ [min <sup>-1</sup> ] | $K_{\text{m}}$ [μM] | $k_{\text{cat}}/K_{\text{m}}$ [mM <sup>-1</sup> min <sup>-1</sup> ] |
|-----------|---------------------------------------|---------------------|---------------------------------------------------------------------|
| L-Pro     | 6.36 ± 0.28                           | 125 ± 24            | 50.8 ± 11.6                                                         |

[a] Catalytic parameters were determined by a coupled hydroxamate-MesG continuous spectrophotometric assay.<sup>1</sup> Comprehensive analysis of relative substrate specificities of the homologous A-domain within the first module of TycB (TycB1) have revealed that it exhibited strict substrate specificities and activated exclusively the cognate substrate L-Pro within the 10 amino acid substrates tested.<sup>2</sup>

**Table S3.** Dose–response competitive ABPP experiments to assess the selectivity of **6**, **12**, **18**, **20**, and **25** towards the A-domains of endogenous and recombinant GrsA.

| cpd       | structure | IC <sub>50</sub> (μM) |                  |
|-----------|-----------|-----------------------|------------------|
|           |           | endogenous GrsA       | recombinant GrsA |
| <b>6</b>  |           | 0.38 ± 0.14           | 0.24 ± 0.04      |
| <b>12</b> |           | 23.0 ± 0.12           | 10.0 ± 0.11      |
| <b>18</b> |           | 27.2 ± 0.22           | 9.86 ± 0.09      |
| <b>20</b> |           | 9.90 ± 0.13           | 1.51 ± 0.20      |
| <b>25</b> |           | 126 ± 0.18            | 49.9 ± 0.27      |

**Table S4.** Dose–response competitive ABPP experiments to assess the selectivity of **7** towards the Pro-activating domains of endogenous GrsB and recombinant TycB1.

| cpd      | structure | IC <sub>50</sub> (μM) |                   |
|----------|-----------|-----------------------|-------------------|
|          |           | endogenous GrsB       | recombinant TycB1 |
| <b>7</b> |           | 0.29 ± 0.09           | 0.69 ± 0.20       |

**Table S5.** Dose–response competitive ABPP experiments to assess the selectivity of **8**, **15**, **23**, and **24** towards the Orn-activating domain of endogenous GrsB.

| cpd       | structure | IC <sub>50</sub> |
|-----------|-----------|------------------|
|           |           | endogenous GrsB  |
| <b>8</b>  |           | 18.5 ± 2.6 (nM)  |
| <b>15</b> |           | 139 ± 0.33 (μM)  |
| <b>23</b> |           | 8.2 ± 0.14 (μM)  |
| <b>24</b> |           | 4.6 ± 0.15 (μM)  |

**Table S6.** Dose–response competitive ABPP experiments to assess the selectivity of **11**, **12**, **13**, **18**, **20**, and **25** towards the Val-activating domain of endogenous GrsB.

| cpd       | structure                                                                           | IC <sub>50</sub> (μM) |
|-----------|-------------------------------------------------------------------------------------|-----------------------|
|           |                                                                                     | endogenous GrsB       |
| <b>11</b> | 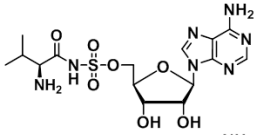   | 0.11 ± 0.04           |
| <b>12</b> | 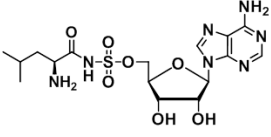   | 2.8 ± 0.23            |
| <b>13</b> | 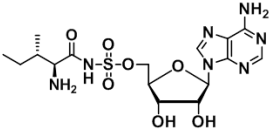   | 6.0 ± 0.10            |
| <b>18</b> | 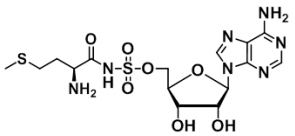  | 0.42 ± 0.08           |
| <b>20</b> | 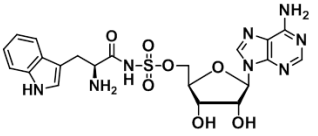 | 0.65 ± 0.04           |
| <b>25</b> | 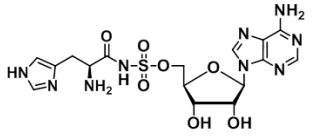 | 2.2 ± 0.28            |

**Table S7.** Dose–response competitive ABPP experiments to assess the selectivity of **12** and **18** towards the Leu-activating domain of endogenous GrsB.

| cpd       | structure                                                                           | IC <sub>50</sub> |
|-----------|-------------------------------------------------------------------------------------|------------------|
|           |                                                                                     | endogenous GrsB  |
| <b>12</b> | 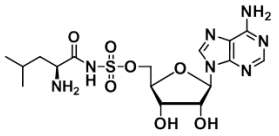 | 1.7 ± 0.09 nM    |
| <b>18</b> | 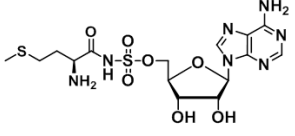 | 2.7 ± 0.22 μM    |

## Chemical Synthetic Procedures

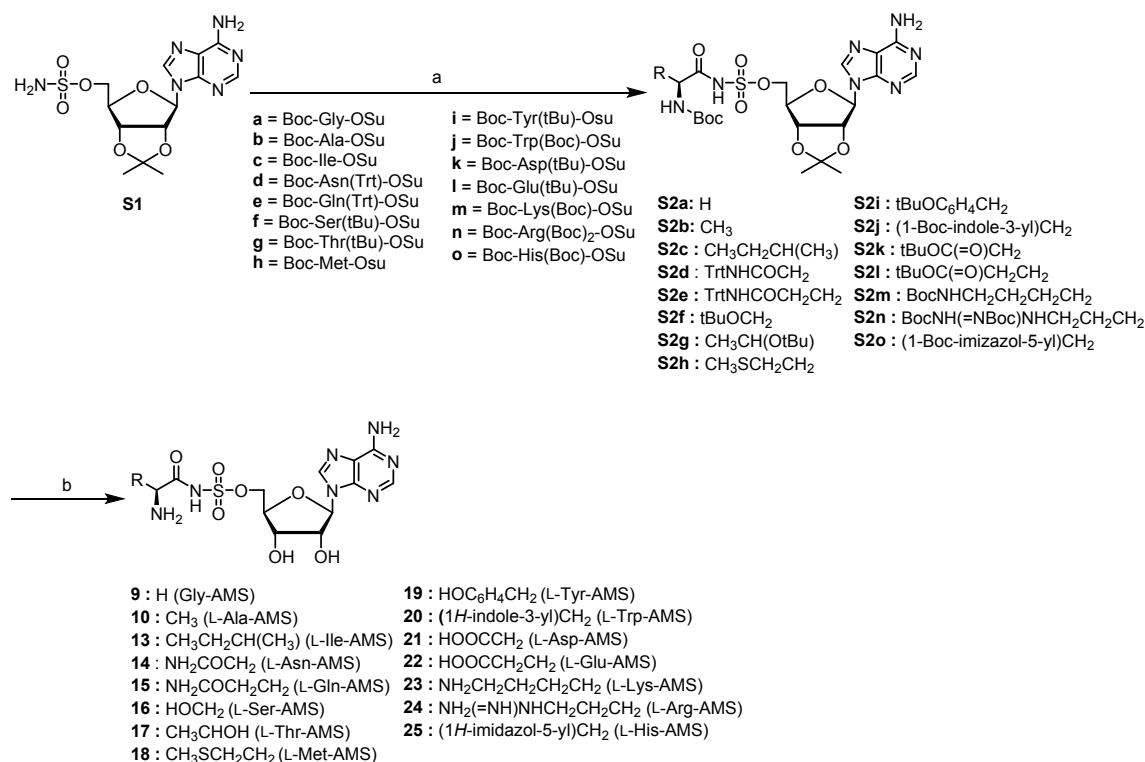

**Scheme S1. Synthetic route to sulfamoyloxy-linked aminoacyl-AMP analogues.** *Reagents and conditions:* [a] *N*-hydroxysuccinimide esters **a-o**, Cs<sub>2</sub>CO<sub>3</sub>, DMF, rt: 92% (**S2a**); 53% (**S2b**); 90% (**S2c**); 88% (**S2d**); 77% (**S2e**); 65% (**S2f**); 63% (**S2g**); 75% (**S2h**); 98% (**S2i**); 57% (**S2j**); 66% (**S2k**); 76% (**S2l**); 98% (**S2m**); 78% (**S2n**); 59% (**S2o**); [b] 80% aqueous TFA or a mixture of 90:5:5 (v/v) of TFA, H<sub>2</sub>O, and TIS, rt: 52% (**9**); 77% (**10**); 70% (**13**); 70% (**14**); 40% (**15**); 23% (**16**); 49% (**17**); 57% (**18**); 74% (**19**); 90% (**20**); 83% (**21**); 98% (**22**); 61% (**23**); 70% (**24**); 74% (**25**).

**General Synthetic Methods:** All commercial reagents were used as provided unless otherwise indicated. 5'-*O*-sulfamoyl-2',3'-isopropylideneadenosine **S1**<sup>3</sup> (Schemes S1) is known compounds. These compounds were prepared according to published literature procedures. All reactions were carried out under an atmosphere of nitrogen in dry solvents with oven-dried glassware and constant magnetic stirring unless otherwise noted. High performance liquid chromatography (HPLC) was performed on a Prominence CBM-20A (Shimadzu) system equipped with a Prominence SPD-20A UV/VIS detector (Shimadzu). <sup>1</sup>H-NMR spectra were recorded at 500 MHz. <sup>13</sup>C-NMR spectra were recorded at 125 MHz on JEOL NMR

spectrometers and standardized to the NMR solvent signal as reported by Gottlieb.<sup>4</sup> Multiplicities are given as s = singlet, d = doublet, t = triplet, q = quartet, dd = doublet of doublets, ddd = doublet of triplets, br = broad signal, m = multiplet using integration and coupling constant in Hertz. TLC analysis was performed using Silica Gel 60 F254 plates (Merck) and visualization was accomplished with ultraviolet light ( $\lambda = 254$  nm) and/or the appropriate stain [phosphomolybdic acid, iodine, ninhydrin, and potassium permanganate]. Silica gel chromatography was carried out with SiliaFlash F60 230-400 mesh (Silicycle), according to the method of Still.<sup>5</sup> Mass spectral data were obtained using a LCMS-IT-TOF mass spectrometer (Shimadzu).

### Chemical Synthesis of Gly-AMS 9

#### 5'-O-[N-(N-Boc-glycyl)sulfamoyl]-2',3'-O-isopropylideneadenosine triethylammonium salt (**S2a**)

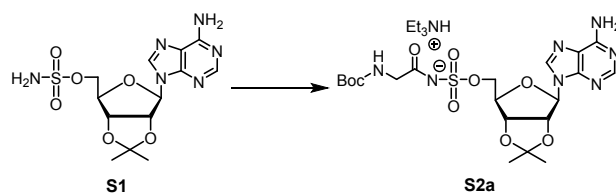

Boc-Gly-OSu (53 mg, 0.20 mmol) and cesium carbonate (127 mg, 0.39 mmol) were added to a solution of 5'-O-sulfamoyl-2',3'-O-isopropylideneadenosine **S1** (50 mg, 0.13 mmol) in DMF (10 mL). The solution was stirred at room temperature for 12 h. The reaction mixture was filtered through a pad of Celite. The filtrate was concentrated under reduced pressure. The residue was purified by flash chromatography (90:10:1 CHCl<sub>3</sub>/MeOH/Et<sub>3</sub>N) to afford compound **S2a** as a white solid (96 mg, 92%). <sup>1</sup>H NMR (500 MHz, DMSO-*d*<sub>6</sub>)  $\delta$  8.39 (s, 1H), 8.32 (s, 1H), 8.16 (s, 1H), 7.35 (br, 2H), 6.34 (t, *J* = 5.7 Hz), 6.16 (d, *J* = 2.9 Hz), 5.36 (dd, *J* = 6.3, 2.9 Hz, 1H), 5.01 (dd, *J* = 5.7, 2.3 Hz, 1H), 4.39–4.36 (m, 1H), 3.99 (dddd, *J* = 22.9, 22.9, 22.9, 5.2 Hz, 2H), 3.40 (t, *J* = 4.9 Hz, 2H), 2.88 (q, *J* = 7.4 Hz, 12H, Et<sub>3</sub>N-CH<sub>2</sub>), 1.54 (s, 3H), 1.35 (s, 9H), 1.32 (s, 3H), 1.09 (t, *J* = 7.4 Hz, 18H, Et<sub>3</sub>N-CH<sub>3</sub>). <sup>13</sup>C NMR (125 MHz, DMSO-*d*<sub>6</sub>)  $\delta$  173.8, 156.1, 155.5, 152.8, 149.0, 139.5, 118.8, 113.1, 89.2, 83.8, 83.4, 81.6, 79.2, 77.5, 67.0, 45.6, 28.2, 27.0, 25.2, 9.5. HRMS (ESI<sup>+</sup>): [M+H]<sup>+</sup> calcd for C<sub>20</sub>H<sub>29</sub>N<sub>7</sub>O<sub>9</sub>S, 544.1820; found, 544.1792.

#### 5'-O-(N-Glycyl)sulfamoyladenosine triethylammonium salt (**9**)

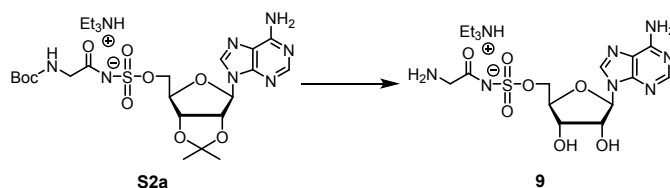

Compound **S2a** (44 mg, 0.082 mmol) was dissolved in a 4:1 (v/v) mixture of TFA and H<sub>2</sub>O at room temperature. After 10 h, the flask was placed on the rotary evaporator and the TFA and H<sub>2</sub>O were removed at reduced pressure. The residue was purified by flash chromatography (50:50:1 CHCl<sub>3</sub>/MeOH/Et<sub>3</sub>N) to afford compound **9** as a white solid (17 mg, 52%). <sup>1</sup>H NMR (500 MHz, DMSO-*d*<sub>6</sub>) δ 8.39 (s, 1H), 8.15 (s, 1H), 7.30 (br, 2H), 5.92 (d, *J* = 6.3 Hz, 1H), 4.60 (t, *J* = 5.5 Hz, 1H), 4.18–4.14 (m, 2H), 4.11–4.05 (m, 2H), 3.31 (s, 2H), 2.94 (q, *J* = 7.5 Hz, 1.3H, Et<sub>3</sub>N-CH<sub>2</sub>), 1.12 (t, *J* = 7.5 Hz, 2H, Et<sub>3</sub>N-CH<sub>3</sub>). <sup>13</sup>C NMR (125 MHz, DMSO-*d*<sub>6</sub>) δ 169.8, 156.1, 152.7, 149.6, 139.4, 118.9, 87.0, 82.4, 73.5, 70.7, 67.6, 45.6, 42.7, 9.1. HRMS (ESI<sup>+</sup>): [M+H]<sup>+</sup> calcd for C<sub>12</sub>H<sub>18</sub>N<sub>7</sub>O<sub>7</sub>S, 404.0983; found, 404.0955.

#### Chemical Synthesis of L-Ala-AMS 10

**5'-O-[N-(N-Boc-L-alanyl)sulfamoyl]-2',3'-O-isopropylideneadenosine triethylammonium salt (S2b)**

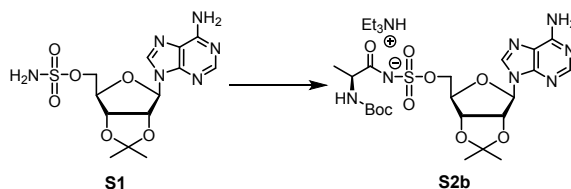

Boc-Ala-OSu (56 mg, 0.20 mmol) and cesium carbonate (127 mg, 0.39 mmol) were added to a solution of 5'-O-sulfamoyl-2',3'-O-isopropylideneadenosine **S1** (50 mg, 0.13 mmol) in DMF (10 mL). The solution was stirred at room temperature for 12 h. The reaction mixture was filtered through a pad of Celite. The filtrate was concentrated under reduced pressure. The residue was purified by flash chromatography (95:5:1 CHCl<sub>3</sub>/MeOH/Et<sub>3</sub>N) to afford compound **S2b** as a white solid (39 mg, 53%). <sup>1</sup>H NMR (500 MHz, CD<sub>3</sub>OD) δ 8.46 (s, 1H), 8.22 (s, 1H), 6.23 (d, *J* = 3.4 Hz, 1H), 5.36 (q, *J* = 2.9 Hz, 1H), 5.15–5.08 (m, 1H), 4.55–4.50 (m, 1H), 4.26–4.18 (m, 2H), 4.03–3.90 (m, 1H), 3.18 (q, *J* = 7.5 Hz, 6H, Et<sub>3</sub>N-CH<sub>2</sub>), 1.60 (s, 3H), 1.45–1.35 (m, 12H), 1.32–1.22 (m, 12H, Et<sub>3</sub>N-CH<sub>3</sub>). <sup>13</sup>C NMR (125 MHz, CD<sub>3</sub>OD) δ 181.4, 157.4, 157.3, 154.0, 150.5, 141.4, 120.1, 115.2, 91.8, 85.7, 85.6, 83.3, 80.0, 69.7, 53.7, 47.8, 28.8, 27.5, 25.6, 19.8, 9.2. HRMS (ESI<sup>−</sup>): [M−H]<sup>−</sup> calcd for C<sub>21</sub>H<sub>30</sub>N<sub>7</sub>O<sub>9</sub>S, 556.1826; found, 556.1833.

### 5'-O-*N*-(*L*-Alanyl)sulfamoyladenosine triethylammonium salt (**10**)

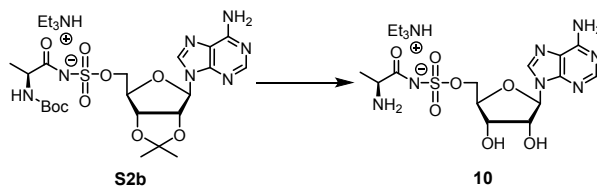

Compound **S2b** (40 mg, 0.061 mmol) was dissolved in a 4:1 (v/v) mixture of TFA and H<sub>2</sub>O at room temperature. After 3 h, the flask was placed on the rotary evaporator and the TFA and H<sub>2</sub>O were removed at reduced pressure. The residue was purified by flash chromatography (67:33:1 CHCl<sub>3</sub>/MeOH/Et<sub>3</sub>N to 100:1 MeOH/Et<sub>3</sub>N) to afford compound **10** as a white solid (21 mg, 77%). <sup>1</sup>H NMR (500 MHz, DMSO-*d*<sub>6</sub>) δ 8.37 (s, 1H), 8.14 (s, 1H), 7.27 (br, 2H), 5.91 (d, *J* = 5.7 Hz, 1H), 4.60 (t, *J* = 5.2 Hz, 1H), 4.18–4.12 (m, 2H), 4.11–4.03 (m, 2H), 3.48 (dd, *J* = 7.5, 6.9 Hz, 1H), 2.73 (q, *J* = 7.5 Hz, 2H, Et<sub>3</sub>N-CH<sub>2</sub>), 1.30 (d, *J* = 7.5 Hz, 1H), 1.03 (t, *J* = 7.5 Hz, 3H, Et<sub>3</sub>N-CH<sub>3</sub>). <sup>13</sup>C NMR (125 MHz, DMSO-*d*<sub>6</sub>) δ 173.2, 156.0, 152.7, 149.6, 139.4, 118.9, 87.0, 82.5, 73.4, 70.7, 67.6, 50.7, 45.7, 17.2, 10.2. HRMS (ESI<sup>−</sup>): [M-H]<sup>−</sup> calcd for C<sub>13</sub>H<sub>18</sub>N<sub>7</sub>O<sub>7</sub>S, 416.0988; found, 416.0983.

### Chemical Synthesis of L-Ile-AMS **13**

#### 5'-O-[*N*-(*N*-Boc-*L*-isoleucyl)sulfamoyl]-2',3'-O-isopropylideneadenosine triethylammonium salt (**S2c**)

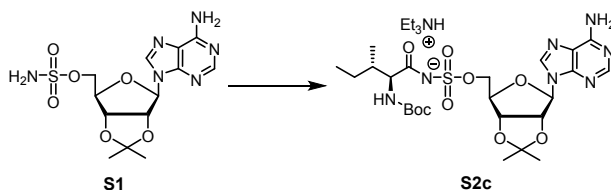

Boc-Ile-OSu (64 mg, 0.20 mmol) and cesium carbonate (127 mg, 0.39 mmol) were added to a solution of 5'-O-sulfamoyl-2',3'-O-isopropylideneadenosine **S1** (50 mg, 0.13 mmol) in DMF (10 mL). The solution was stirred at room temperature for 12 h. The reaction mixture was filtered through a pad of Celite. The filtrate was concentrated under reduced pressure. The residue was purified by flash chromatography (90:10:1 CHCl<sub>3</sub>/MeOH/Et<sub>3</sub>N) to afford compound **S2c** as a white solid (69 mg, 90%). <sup>1</sup>H NMR (500 MHz, DMSO-*d*<sub>6</sub>) δ 8.40 (s, 1H), 8.15 (s, 1H), 7.35 (br, 2H), 6.16 (d, *J* = 2.9 Hz, 1H), 5.84 (d, *J* = 8.0 Hz, 1H), 5.34 (dd, *J* = 5.8, 2.9 Hz, 1H), 5.00 (dd, *J* = 5.7, 1.7 Hz, 1H), 4.40–4.37 (m, 1H), 4.05–3.98 (m, 2H), 3.66 (dd, *J* = 8.6, 5.2 Hz, 1H), 2.81 (q, *J* = 7.5 Hz, 18H, Et<sub>3</sub>N-CH<sub>2</sub>), 1.75–1.66 (m, 1H), 1.54 (s, 3H), 1.35 (s, 9H), 1.31 (s, 3H), 1.06

(t,  $J = 7.5$  Hz, 27H, Et<sub>3</sub>N-CH<sub>3</sub>), 0.83–0.76 (m, 8H). <sup>13</sup>C NMR (125 MHz, DMSO-*d*<sub>6</sub>)  $\delta$  175.8, 156.1, 155.1, 152.8, 149.0, 139.5, 118.9, 113.2, 89.2, 83.7, 83.5, 81.7, 77.5, 67.2, 60.5, 48.6, 39.2, 28.2, 27.1, 25.2, 24.3, 15.7, 11.7, 9.8. HRMS (ESI<sup>+</sup>): [M+H]<sup>+</sup> calcd for C<sub>24</sub>H<sub>38</sub>N<sub>7</sub>O<sub>9</sub>S, 600.2446; found, 600.2417.

### 5'-*O*-*N*-(*L*-Isoleucyl)sulfamoyladenosine triethylammonium salt (**13**)

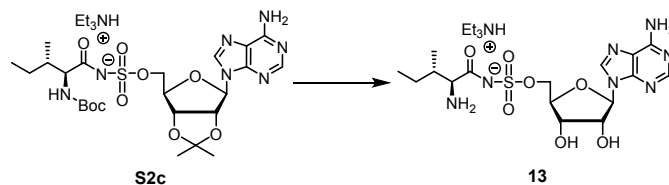

Compound **S2c** (30 mg, 0.050 mmol) was dissolved in a 4:1 (v/v) mixture of TFA and H<sub>2</sub>O at room temperature. After 4 h, the flask was placed on the rotary evaporator and the TFA and H<sub>2</sub>O were removed at reduced pressure. The residue was purified by flash chromatography (50:50:1 CHCl<sub>3</sub>/MeOH/Et<sub>3</sub>N) to afford compound **13** as a colorless oil (16 mg, 70%). <sup>1</sup>H NMR (500 MHz, CD<sub>3</sub>OD)  $\delta$  8.55 (s, 1H), 8.21 (s, 1H), 6.09 (d,  $J = 5.2$  Hz, 1H), 4.64 (t,  $J = 5.2$  Hz, 1H), 4.41–4.28 (m, 3H), 3.62–3.55 (m, 2H), 3.18 (q,  $J = 7.5$  Hz, 36H, Et<sub>3</sub>N-CH<sub>2</sub>), 1.64–1.55 (m, 1H), 1.32 (t,  $J = 7.5$  Hz, 54H, Et<sub>3</sub>N-CH<sub>3</sub>), 1.04–0.92 (m, 8H). <sup>13</sup>C NMR (125 MHz, CD<sub>3</sub>OD)  $\delta$  175.0, 173.1, 150.6, 141.6, 137.6, 120.1, 89.5, 84.3, 79.5, 76.2, 69.0, 61.3, 47.4, 38.1, 25.7, 15.5, 12.2, 9.1. HRMS (ESI<sup>+</sup>): [M+H]<sup>+</sup> calcd for C<sub>16</sub>H<sub>26</sub>N<sub>7</sub>O<sub>7</sub>S, 460.1614; found, 460.1604.

### Chemical Synthesis of L-Asn-AMS **14**

#### 5'-*O*-[*N*-(*N*-Boc-*L*-asparaginy)(Trt)sulfamoyl]-2',3'-*O*-isopropylideneadenosine triethylammonium salt (**S2d**)

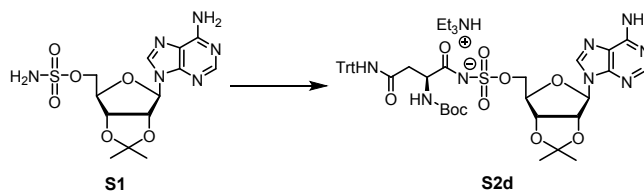

1-Ethyl-3-(3-dimethylaminopropyl)carbodiimide hydrochloride (182 mg, 0.95 mmol) and *N*-hydroxysuccinimide (173 mg, 1.56 mmol) were added to a solution of Boc-Asn(Trt)-OH (300 mg, 0.63 mmol) in DMF (6 mL). After 3 h, the reaction mixture was diluted with EtOAc. The mixture was washed with 5% citric acid, 5% NaHCO<sub>3</sub>, and brine. The organic layer was dried over Na<sub>2</sub>SO<sub>4</sub> and evaporated to dryness. Boc-Asn(Trt)-OSu (155 mg, 0.27 mmol) and cesium



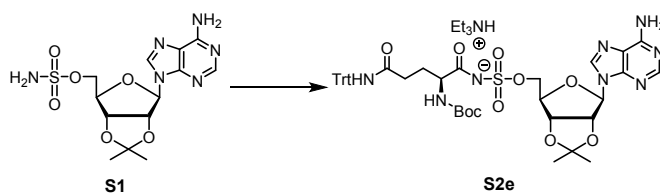

1-Ethyl-3-(3-dimethylaminopropyl)carbodiimide hydrochloride (240 mg, 1.20 mmol) and *N*-hydroxysuccinimide (140 mg, 1.20 mmol) were added to a solution of Boc-Gln(Trt)-OH (400 mg, 0.82 mmol) in CH<sub>2</sub>Cl<sub>2</sub> (5 mL). The solution was stirred at room temperature for 5 h. The reaction mixture was evaporated to dryness. The residue was purified by flash chromatography (1:4 to 2:1 EtOAc/hexane) to afford Boc-Gln(Trt)-OSu as a white solid (410 mg, 86%). Boc-Gln(Trt)-OSu (110 mg, 0.19 mmol) and cesium carbonate (127 mg, 0.39 mmol) were added to a solution of 5'-*O*-sulfamoyl-2',3'-isopropylideneadenosine **S1** (50 mg, 0.13 mmol) in DMF (2 mL). The solution was stirred at room temperature for 1 h. The reaction mixture was filtered through a pad of Celite. The filtrate was concentrated under reduced pressure. The residue was purified by flash chromatography (95:5:1 to 90:10:1 EtOAc/MeOH/Et<sub>3</sub>N) to afford compound **S2e** as a colorless oil (99 mg, 77%). <sup>1</sup>H NMR (500 MHz, CD<sub>3</sub>OD) δ 8.48 (s, 1H), 8.21 (s, 1H), 7.30–7.15 (m, 15H), 6.21 (d, *J* = 3.5 Hz, 1H), 5.32 (dd, *J* = 6.0, 3.5 Hz, 1H), 5.09 (dd, *J* = 6.0, 1.5 Hz, 1H), 4.50 (br, 1H), 4.23 (d, *J* = 4.0 Hz, 2H), 4.05 (dd, *J* = 6.0, 5.0 Hz, 1H), 3.06 (q, *J* = 7.5 Hz, 6H, Et<sub>3</sub>N-CH<sub>2</sub>), 2.41–2.24 (m, 2H), 2.10–1.94 (m, 1H), 1.94–1.79 (m, 1H), 1.61 (s, 3H), 1.41 (s, 9H), 1.36 (s, 3H), 1.20 (t, *J* = 7.5 Hz, 9H, Et<sub>3</sub>N-CH<sub>3</sub>). <sup>13</sup>C NMR (125 MHz, CD<sub>3</sub>OD) δ 180.0, 174.7, 157.6, 157.3, 154.0, 150.5, 146.0, 141.4, 130.0, 128.7, 127.7, 120.1, 115.2, 91.6, 85.6, 85.4, 83.1, 80.1, 71.5, 69.7, 57.5, 47.7, 34.3, 30.8, 28.8, 27.5, 25.6, 9.4. HRMS (ESI<sup>−</sup>): [M-H]<sup>−</sup> calcd for C<sub>42</sub>H<sub>47</sub>N<sub>8</sub>O<sub>10</sub>S, 855.3141; found, 855.3157.

#### 5'-*O*-*N*-(*L*-Glutaminy)sulfamoyl-adenosine triethylammonium salt (**15**)

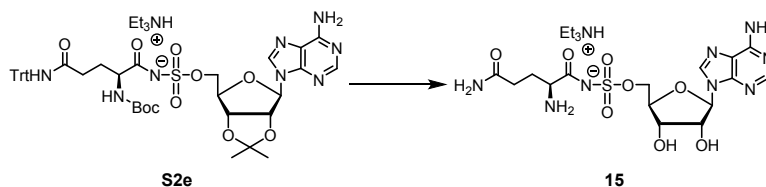

Compound **S2e** (35 mg, 0.035 mmol) was dissolved in a 4:1 (v/v) mixture of TFA and H<sub>2</sub>O at room temperature. After 30 min, the flask was placed on the rotary evaporator and the TFA and H<sub>2</sub>O were removed at reduced pressure. The residue was purified by flash chromatography (67:33:1 CHCl<sub>3</sub>/MeOH/Et<sub>3</sub>N to MeOH) to afford compound **15** as a white solid (7.5 mg, 40%). <sup>1</sup>H NMR (500 MHz, CD<sub>3</sub>OD): δ 8.51 (s, 1H), 8.20 (s, 1H), 6.09 (d, *J* = 5.0 Hz, 1H), 4.63 (t, *J* =

5.0 Hz, 1H), 4.41–4.27 (m, 4H), 3.68 (t,  $J = 6.0$  Hz, 1H), 3.14 (q,  $J = 7.5$  Hz, 6H, Et<sub>3</sub>N-CH<sub>2</sub>), 2.47 (t,  $J = 7.0$  Hz, 2H), 2.18–2.03 (m, 2H), 1.29 (t,  $J = 7.5$  Hz, 9H, Et<sub>3</sub>N-CH<sub>3</sub>). <sup>13</sup>C NMR (500 MHz, CD<sub>3</sub>OD)  $\delta$  181.5, 180.5, 157.3, 153.9, 150.8, 141.1, 120.2, 89.3, 84.4, 76.1, 72.2, 69.0, 60.6, 47.9, 30.9, 26.9, 9.2. HRMS (ESI<sup>−</sup>): [M−H]<sup>−</sup> calcd for C<sub>15</sub>H<sub>21</sub>N<sub>8</sub>O<sub>8</sub>S, 473.1209; found, 473.1208.

### Chemical Synthesis of L-Ser-AMS 16

#### 5'-O-[N-(N-Boc-L-seryl(tBu))sulfamoyl]-2',3'-O-isopropylideneadenosine triethylammonium salt (**S2f**)

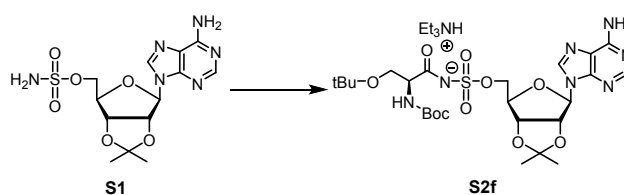

1-Ethyl-3-(3-dimethylaminopropyl)carbodiimide hydrochloride (160 mg, 0.81 mmol), *N*-hydroxysuccinimide (94 mg, 0.81 mmol), DIEA (0.35 mL, 2.0 mmol), and DMAP (8.3 mg, 0.068 mmol) were added to a solution of Boc-Ser(tBu)-OH·DCHA (300 mg, 0.68 mmol) in CH<sub>2</sub>Cl<sub>2</sub> (5 mL). The solution was stirred at room temperature for 3 h. The reaction mixture was washed with a 0.1 M HCl solution, saturated NaHCO<sub>3</sub>, and brine. The organic layer was dried over Na<sub>2</sub>SO<sub>4</sub> and evaporated to dryness. The residue was purified by flash chromatography (1:9 to 1:2 EtOAc/hexane) to afford Boc-Ser(tBu)-OSu as a white solid (147 mg, 60%). Boc-Ser(tBu)-OSu (70 mg, 0.19 mmol) and cesium carbonate (127 mg, 0.39 mmol) were added to a solution of 5'-O-sulfamoyl-2',3'-O-isopropylideneadenosine **S1** (50 mg, 0.13 mmol) in DMF (2 mL). The solution was stirred at room temperature for 1 h. The reaction mixture was filtered through a pad of Celite. The filtrate was concentrated under reduced pressure. The residue was purified by flash chromatography (95:5:1 to 80:20:1 EtOAc/MeOH/Et<sub>3</sub>N) to afford compound **S2f** as a colorless oil (61 mg, 65%). <sup>1</sup>H NMR (500 MHz, CD<sub>3</sub>OD):  $\delta$  8.49 (s, 1H), 8.22 (s, 1H), 6.24 (d,  $J = 3.5$  Hz, 1H), 5.37 (dd,  $J = 5.5, 3.5$  Hz, 1H), 5.12 (d,  $J = 4.5$  Hz, 1H), 4.54 (dd,  $J = 6.0, 4.0$  Hz, 1H), 4.27–4.19 (m, 2H), 4.07 (t,  $J = 3.5$  Hz, 1H), 3.76–3.68 (m, 1H), 3.63 (dd,  $J = 9.5, 3.5$  Hz, 1H), 3.18 (q,  $J = 7.5$  Hz, 6H, Et<sub>3</sub>N-CH<sub>2</sub>), 1.61 (s, 3H), 1.42 (s, 9H), 1.39 (s, 3H), 1.28 (t,  $J = 7.5$  Hz, 9H, Et<sub>3</sub>N-CH<sub>3</sub>), 1.12 (s, 9H). <sup>13</sup>C NMR (125 MHz, CD<sub>3</sub>OD):  $\delta$  178.5, 157.5, 157.3, 154.0, 150.5, 141.4, 120.1, 115.2, 91.9, 85.7, 85.5, 83.4, 80.2, 74.3, 69.7, 64.2, 58.6, 47.8, 28.8, 27.8, 27.5, 25.6, 9.2. HRMS (ESI<sup>+</sup>): [M+H]<sup>+</sup> calcd for C<sub>25</sub>H<sub>40</sub>N<sub>7</sub>O<sub>10</sub>S, 630.2552; found, 630.2552.

### 5'-O-N-(L-Seryl)sulfamoyladenosine triethylammonium salt (**16**)

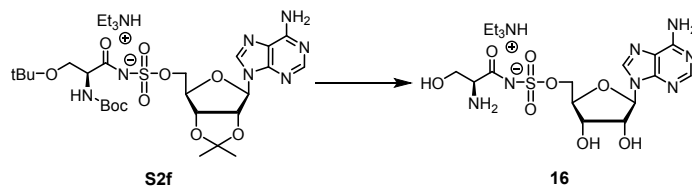

Compound **S2f** (27.4 mg, 0.038 mmol) was dissolved in a 90:5:5 (v/v) mixture of TFA, H<sub>2</sub>O, and TIS at room temperature. After 30 min, the flask was placed on the rotary evaporator and the TFA and H<sub>2</sub>O were removed at reduced pressure. The residue was purified by flash chromatography (80:20:1 to 50:50:1 CHCl<sub>3</sub>/MeOH/Et<sub>3</sub>N) to afford compound **16** as a white solid (4.7 mg, 23%). <sup>1</sup>H NMR (500 MHz, CD<sub>3</sub>OD): δ 8.50 (s, 1H), 8.21 (s, 1H), 6.09 (d, *J* = 5.0 Hz, 1H), 4.62 (t, *J* = 5.0 Hz, 1H), 4.43–4.26 (m, 3H), 3.97 (dd, *J* = 11.5, 4.0 Hz, 1H), 3.93–3.78 (m, 2H), 3.75–3.66 (m, 1H), 3.19 (q, *J* = 7.5 Hz, 6H, Et<sub>3</sub>N-CH<sub>2</sub>), 1.30 (t, *J* = 7.5 Hz, 9H, Et<sub>3</sub>N-CH<sub>3</sub>). <sup>13</sup>C NMR (500 MHz, DMSO-*d*<sub>6</sub>) δ 170.5, 156.0, 152.7, 149.6, 139.4, 118.9, 87.0, 82.5, 73.5, 70.7, 67.5, 60.8, 57.4, 45.5, 9.9. HRMS (ESI<sup>+</sup>): [M+H]<sup>+</sup> calcd for C<sub>13</sub>H<sub>20</sub>N<sub>7</sub>O<sub>8</sub>S, 434.1089; found, 434.1086.

### Chemical Synthesis of L-Thr-AMS 17

#### 5'-O-[N-(N-Boc-L-threonyl(tBu))sulfamoyl]-2',3'-O-isopropylideneadenosine triethylammonium salt (**S2g**)

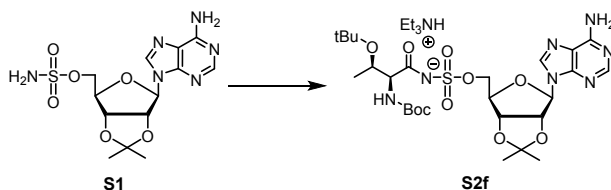

1-Ethyl-3-(3-dimethylaminopropyl)carbodiimide hydrochloride (170 mg, 0.87 mmol), *N*-hydroxysuccinimide (100 mg, 0.87 mmol), DIEA (0.38 mL, 2.2 mmol), and DMAP (8.9 mg, 0.073 mmol) were added to a solution of Boc-Thr(tBu)-OH (200 mg, 0.73 mmol) in CH<sub>2</sub>Cl<sub>2</sub> (5 mL). The solution was stirred at room temperature for 2 h. The reaction mixture was washed with a 0.1 M HCl solution, saturated NaHCO<sub>3</sub>, and brine. The organic layer was dried over Na<sub>2</sub>SO<sub>4</sub> and evaporated to dryness. The residue was purified by flash chromatography (1:5 to 1:2 EtOAc/hexane) to afford Boc-thr(tBu)-OSu as a white solid (220 mg, 82%). Boc-Thr(tBu)-OSu (72 mg, 0.19 mmol) and cesium carbonate (127 mg, 0.39 mmol) were added to a solution of 5'-O-sulfamoyl-2',3'-isopropylideneadenosine **S1** (50 mg, 0.13 mmol) in DMF (2 mL). The

solution was stirred at room temperature for 1 h. The reaction mixture was filtered through a pad of Celite. The filtrate was concentrated under reduced pressure. The residue was purified by flash chromatography (95:5:1 to 80:20:1 EtOAc/MeOH/Et<sub>3</sub>N) to afford compound **S2g** as a white solid (62 mg, 63%). <sup>1</sup>H NMR (500 MHz, CD<sub>3</sub>OD): δ 8.49 (s, 1H), 8.22 (s, 1H), 6.23 (d, *J* = 3.5 Hz, 1H), 5.37 (dd, *J* = 6.0, 3.5 Hz, 1H), 5.10 (dd, *J* = 6.0, 2.0 Hz, 1H), 4.53 (dd, *J* = 6.0, 3.5 Hz, 1H), 4.26 (dd, *J* = 11.0, 4.0 Hz, 1H), 4.22 (dd, *J* = 11.0, 3.0 Hz, 1H), 4.18 (dd, *J* = 6.0, 2.5 Hz, 1H), 3.88 (dd, *J* = 7.5, 2.5 Hz, 1H), 3.11 (q, *J* = 7.5 Hz, 6H, Et<sub>3</sub>N-CH<sub>2</sub>), 1.61 (s, 3H), 1.42 (s, 9H), 1.38 (s, 3H), 1.25 (t, *J* = 7.5 Hz, 9H, Et<sub>3</sub>N-CH<sub>3</sub>), 1.16 (s, 9H). <sup>13</sup>C NMR (125 MHz, CD<sub>3</sub>OD): δ 179.2, 158.1, 157.3, 154.0, 150.5, 141.4, 120.1, 115.2, 91.9, 85.7, 85.6, 83.4, 80.2, 74.9, 69.7, 63.4, 47.8, 29.0, 28.8, 27.5, 25.7, 21.9, 9.4. HRMS (ESI<sup>+</sup>): [M+H]<sup>+</sup> calcd for C<sub>26</sub>H<sub>40</sub>N<sub>7</sub>O<sub>10</sub>S, 642.2563; found, 642.2561.

#### 5'-O-N-(L-Threonyl)sulfamoyladenosine triethylammonium salt (**17**)

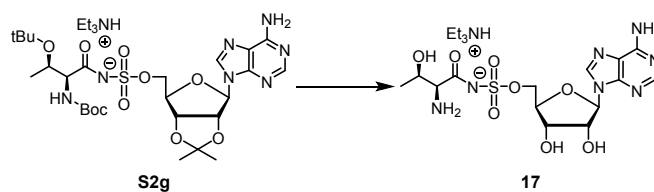

Compound **S2g** (41 mg, 0.054 mmol) was dissolved in a 90:5:5 (v/v) mixture of TFA, H<sub>2</sub>O, and TIS at room temperature. After 30 min, the flask was placed on the rotary evaporator and the TFA and H<sub>2</sub>O were removed at reduced pressure. The residue was purified by flash chromatography (90:10:1 to 60:40:1 CHCl<sub>3</sub>/MeOH/Et<sub>3</sub>N) to afford compound **17** as a white solid (13 mg, 49%). <sup>1</sup>H NMR (500 MHz, CD<sub>3</sub>OD): δ 8.51 (s, 1H), 8.19 (s, 1H), 6.08 (d, *J* = 4.5 Hz, 1H), 4.61 (t, *J* = 4.5 Hz, 1H), 4.45–4.27 (m, 4H), 4.19 (t, *J* = 6.0 Hz, 1H), 3.45 (d, *J* = 4.5 Hz, 1H), 3.13 (q, *J* = 7.5 Hz, 6H, Et<sub>3</sub>N-CH<sub>2</sub>), 1.31 (d, *J* = 6.5 Hz, 3H), 1.28 (t, *J* = 7.5 Hz, 9H, Et<sub>3</sub>N-CH<sub>3</sub>). <sup>13</sup>C NMR (125 MHz, CD<sub>3</sub>OD): δ 174.6, 157.2, 153.9, 150.7, 141.2, 120.1, 89.5, 84.2, 76.2, 71.9, 68.9, 67.6, 62.9, 47.8, 21.0, 9.4. HRMS (ESI<sup>+</sup>): [M+H]<sup>+</sup> calcd for C<sub>14</sub>H<sub>22</sub>N<sub>7</sub>O<sub>8</sub>S, 448.1245; found, 448.1220.

#### Chemical Synthesis of L-Met-AMS **18**

##### 5'-O-[N-(N-Boc-L-methionyl)sulfamoyl]-2',3'-O-isopropylideneadenosine triethylammonium salt (**S2h**)

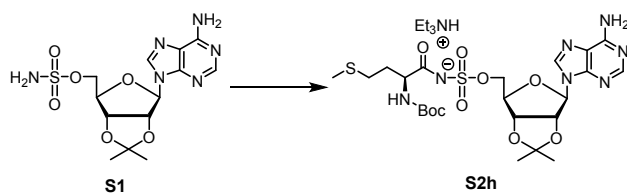

Boc-Met-OSu (68 mg, 0.20 mmol) and cesium carbonate (127 mg, 0.39 mmol) were added to a solution of 5'-*O*-sulfamoyl-2',3'-isopropylideneadenosine **S1** (50 mg, 0.13 mmol) in DMF (10 mL). The solution was stirred at room temperature for 12 h. The reaction mixture was filtered through a pad of Celite. The filtrate was concentrated under reduced pressure. The residue was purified by flash chromatography (94:6:1 EtOAc/MeOH/Et<sub>3</sub>N) to afford compound **S2h** as a white solid (80 mg, 75%). <sup>1</sup>H NMR (500 MHz, CD<sub>3</sub>OD) δ 8.47 (s, 1H), 8.22 (s, 1H), 6.23 (d, *J* = 2.9 Hz, 1H), 5.38–5.33 (m, 1H), 5.14–5.09 (m, 1H), 4.56–4.52 (m, 1H), 4.27–4.22 (m, 2H), 4.11–4.00 (m, 1H), 3.19 (q, *J* = 7.5 Hz, 6H, Et<sub>3</sub>N-CH<sub>2</sub>), 2.53–2.45 (m, 2H), 2.08–2.00 (m, 4H), 1.90–1.80 (m, 1H), 1.61 (s, 3H), 1.44 (s, 9H), 1.39 (s, 3H), 1.29 (t, *J* = 7.5 Hz, 9H, Et<sub>3</sub>N-CH<sub>3</sub>). <sup>13</sup>C NMR (125 MHz, CD<sub>3</sub>OD) δ 180.2, 157.6, 157.3, 154.0, 150.5, 141.4, 120.1, 115.3, 91.8, 85.7, 85.6, 83.3, 80.1, 69.7, 57.4, 47.9, 34.3, 31.2, 28.8, 27.5, 25.6, 15.3, 9.2. HRMS (ESI<sup>−</sup>): [M-H]<sup>−</sup> calcd for C<sub>23</sub>H<sub>34</sub>N<sub>7</sub>O<sub>9</sub>S<sub>2</sub>, 616.1859; found, 616.1861.

#### 5'-*O*-*N*-(*L*-Methionyl)sulfamoyl-adenosine triethylammonium salt (**18**)

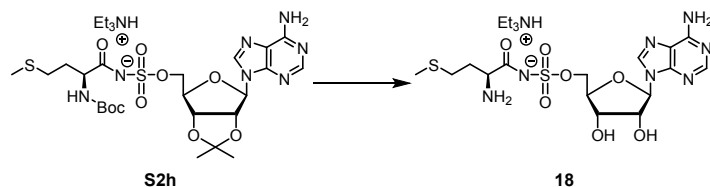

Compound **S2h** (40 mg, 0.061 mmol) was dissolved in a 4:1 (v/v) mixture of TFA and H<sub>2</sub>O at room temperature. After 3 h, the flask was placed on the rotary evaporator and the TFA and H<sub>2</sub>O were removed at reduced pressure. The residue was purified by flash chromatography (75:25:1 CHCl<sub>3</sub>/MeOH/Et<sub>3</sub>N) to afford compound **18** as a white solid (12 mg, 57%). <sup>1</sup>H NMR (500 MHz, DMSO-*d*<sub>6</sub>) δ 8.37 (s, 1H), 8.14 (s, 1H), 7.26 (br, 2H), 5.90 (d, *J* = 5.7 Hz, 1H), 4.59 (t, *J* = 5.2 Hz, 1H), 4.28–4.23 (m, 2H), 4.11–4.04 (m, 2H), 5.52 (dd, *J* = 6.9, 5.2 Hz, 1H), 2.64 (q, *J* = 7.5 Hz, 1.5H, Et<sub>3</sub>N-CH<sub>2</sub>), 2.58–2.52 (m, 1H), 2.05–1.98 (m, 4H), 1.91–1.82 (m, 1H), 1.10 (t, *J* = 7.5 Hz, 2.3H, Et<sub>3</sub>N-CH<sub>3</sub>). <sup>13</sup>C NMR (125 MHz, DMSO-*d*<sub>6</sub>) δ 172.2, 156.0, 152.7, 149.5, 139.4, 118.9, 87.1, 82.4, 73.4, 82.4, 73.4, 70.7, 67.6, 53.8, 45.7, 30.9, 29.0, 14.3, 10.6. HRMS (ESI<sup>−</sup>): [M-H]<sup>−</sup> calcd for C<sub>15</sub>H<sub>22</sub>N<sub>7</sub>O<sub>7</sub>S<sub>2</sub>, 476.1022; found, 476.1027.

## Chemical Synthesis of L-Tyr-AMS 19

### 5'-O-[N-(N-Boc-L-tyrosyl(tBu))sulfamoyl]-2',3'-O-isopropylideneadenosine triethylammonium salt (**S2i**)

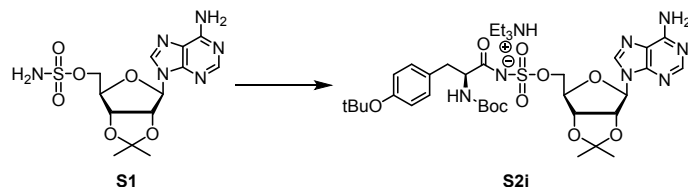

1-Ethyl-3-(3-dimethylaminopropyl)carbodiimide hydrochloride (127 mg, 0.66 mmol) and *N*-hydroxysuccinimide (76 mg, 0.66 mmol) were added to a solution of Boc-Tyr(tBu)-OH (100 mg, 0.30 mmol) in CH<sub>2</sub>Cl<sub>2</sub> (10 mL). The solution was stirred at room temperature for 12 h. The reaction mixture was washed with 5% citric acid, 5% NaHCO<sub>3</sub>, and brine. The organic layer was dried over Na<sub>2</sub>SO<sub>4</sub> and evaporated to dryness to afford Boc-Tyr(tBu)-OSu as a colorless oil (120 mg, 92%). Boc-Tyr(tBu)-OSu (120 mg, 0.28 mmol) and cesium carbonate (293 mg, 0.90 mmol) were added to a solution of 5'-O-sulfamoyl-2',3'-O-isopropylideneadenosine **S1** (58 mg, 0.15 mmol) in DMF (10 mL). The solution was stirred at room temperature for 12 h. The reaction mixture was filtered through a pad of Celite. The filtrate was concentrated under reduced pressure. The residue was purified by flash chromatography (90:10:1 CHCl<sub>3</sub>/MeOH/Et<sub>3</sub>N) to afford compound **S2i** as a colorless oil (104 mg, 98%). <sup>1</sup>H NMR (500 MHz, CD<sub>3</sub>OD) δ 8.46 (s, 1H), 8.22 (s, 1H), 7.13 (d, *J* = 8.0 Hz, 2H), 6.87 (d, *J* = 8.0 Hz, 2H), 6.24 (d, *J* = 2.8 Hz, 1H), 5.36 (dd, *J* = 5.7, 2.9 Hz, 1H), 5.11 (dddd, *J* = 7.3, 7.3, 7.3, 1.8 Hz, 1H), 4.57–4.49 (m, 1H), 4.24–4.15 (m, 2H), 3.45–3.32 (m, 1H), 3.16 (q, *J* = 7.5 Hz, 18H, Et<sub>3</sub>N-CH<sub>2</sub>), 2.89–2.70 (m, 2H), 1.61 (s, 3H), 1.38 (s, 9H), 1.35 (s, 3H), 1.30 (s, 9H), 1.27 (t, *J* = 7.5, 27H, Et<sub>3</sub>N-CH<sub>3</sub>). <sup>13</sup>C NMR (125 MHz, CD<sub>3</sub>OD) δ 178.7, 157.3, 154.8, 154.0, 150.5, 141.4, 134.9, 134.4, 131.0, 124.9, 120.1, 115.2, 91.8, 85.7, 83.2, 79.9, 79.3, 69.7, 58.3, 47.6, 39.2, 29.2, 28.8, 27.5, 25.6, 9.16. HRMS (ESI<sup>−</sup>): [M−H]<sup>−</sup> calcd for C<sub>31</sub>H<sub>42</sub>N<sub>7</sub>O<sub>10</sub>S, 704.2714; found, 704.2722.

### 5'-O-(*N*-Tyrosyl)sulfamoyladenosine triethylammonium salt (**19**)

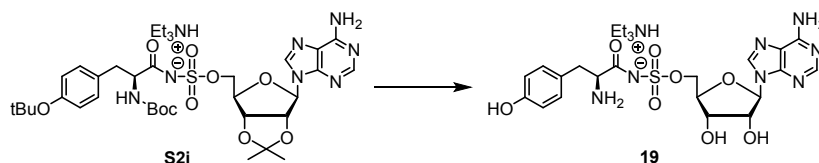

Compound **S2i** (58 mg, 0.082 mmol) was dissolved in a mixture of 90:5:5 (v/v) of TFA, H<sub>2</sub>O, and TIS at room temperature. After 8 h, the flask was placed on the rotary evaporator, and the TFA and H<sub>2</sub>O were removed at reduced pressure. The residue was purified by HPLC [COSMISIL 5C<sub>18</sub>-PAQ: C-18 reverse-phase column,  $\phi$  10 mm  $\times$  250 mm, acetonitrile/aqueous TFA (0.1%, 10:90), 3.0 mL/min, 220 nm,  $t_R$ : 12.5 min] to afford compound **19** as a yellow oil (31 mg, 74%). <sup>1</sup>H NMR (500 MHz, CD<sub>3</sub>OD)  $\delta$  8.60 (s, 1H), 8.39 (s, 1H), 7.09 (d,  $J$  = 8.0 Hz, 2H), 6.70 (d,  $J$  = 8.0 Hz, 2H), 6.14 (d,  $J$  = 4.6 Hz, 1H), 4.63 (t,  $J$  = 4.9 Hz, 1H), 4.44–4.35 (m, 3H), 4.34–4.29 (m, 1H), 3.94 (t,  $J$  = 6.3 Hz, 1H), 3.25–3.16 (m, 1H, overlapping with Et<sub>3</sub>N-CH<sub>2</sub>), 3.08–2.96 (m, 1H). NMR data were in agreement with published data.<sup>6</sup> HRMS (ESI<sup>–</sup>): [M–H]<sup>–</sup> calcd for C<sub>19</sub>H<sub>22</sub>N<sub>7</sub>O<sub>8</sub>S, 508.1251; found, 508.1280.

### Chemical Synthesis of L-Trp-AMS 20

#### 5'-O-[N-(N-Boc-L-tryptophanyl(Boc))sulfamoyl]-2',3'-O-isopropylideneadenosine triethylammonium salt (**S2j**)

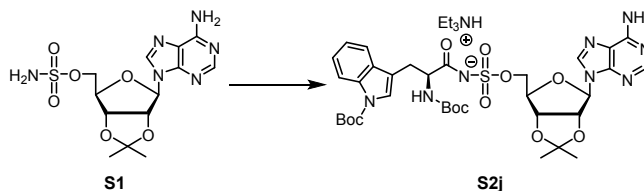

1-Ethyl-3-(3-dimethylaminopropyl)carbodiimide hydrochloride (230 mg, 1.2 mmol) and *N*-hydroxysuccinimide (138 mg, 1.2 mmol) were added to a solution of Boc-Trp(Boc)-OH (405 mg, 1.0 mmol) in DMF (10 mL). After 6 h, the reaction mixture was diluted with EtOAc. The mixture was washed with 5% citric acid, 5% NaHCO<sub>3</sub>, and brine. The organic layer was dried over Na<sub>2</sub>SO<sub>4</sub> and evaporated to dryness. Boc-Trp(Boc)-OSu (98 mg, 0.20 mmol) and cesium carbonate (127 mg, 0.39 mmol) were added to a solution of 5'-O-sulfamoyl-2',3'-isopropylideneadenosine **S1** (50 mg, 0.13 mmol) in DMF (2 mL). The solution was stirred at room temperature for 1 h. The reaction mixture was filtered through a pad of Celite. The filtrate was concentrated under reduced pressure. The residue was purified by flash chromatography (95:5:1 to 91:9:1 EtOAc/MeOH/Et<sub>3</sub>N) to afford compound **S2j** as a white solid (65 mg, 57%). <sup>1</sup>H NMR (500 MHz, CD<sub>3</sub>OD)  $\delta$  8.45 (s, 1H), 8.20 (s, 1H), 8.09–8.00 (m, 1H), 7.72–7.59 (m, 1H), 7.52–7.43 (m, 1H), 7.28–7.13 (m, 2H), 6.21 (d,  $J$  = 3.4 Hz, 1H), 5.36–5.27 (m, 1H), 5.12–5.00 (m, 1H), 4.55–4.45 (m, 1H), 4.37–4.11 (m, 3H), 3.28–3.21 (m, 1H), 3.12 (q,  $J$  = 7.5 Hz, 6H, Et<sub>3</sub>N-CH<sub>2</sub>), 3.04–2.95 (m, 1H), 1.64 (s, 9H), 1.59 (s, 3H), 1.40–1.29 (m, 12H), 1.23 (t,  $J$  = 7.5 Hz, 9H, Et<sub>3</sub>N-CH<sub>3</sub>). <sup>13</sup>C NMR (125 MHz, CD<sub>3</sub>OD)  $\delta$  179.6, 157.3, 154.0, 151.1, 150.5, 141.4, 136.7, 132.4, 125.2, 125.1, 123.5, 120.5, 120.1, 118.1, 115.9, 115.2, 91.8, 85.7, 85.5,

84.5, 83.2, 80.1, 69.7, 58.4, 47.8, 29.6, 28.7, 28.4, 28.2, 27.5, 25.5, 9.2. HRMS (ESI<sup>−</sup>): [M−H]<sup>−</sup> calcd for C<sub>34</sub>H<sub>43</sub>N<sub>8</sub>O<sub>11</sub>S, 771.2772; found, 771.2781.

### 5'-O-N-(L-Tryptophanyl)sulfamoyladenosine triethylammonium salt (**20**)

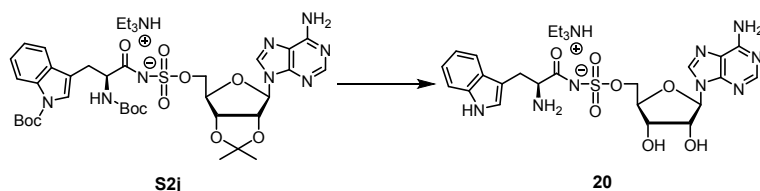

Compound **S2j** (40 mg, 0.046 mmol) was dissolved in a 4:1 (v/v) mixture of TFA and H<sub>2</sub>O at room temperature. After 3 h, the flask was placed on the rotary evaporator and the TFA and H<sub>2</sub>O were removed at reduced pressure. The residue was purified by flash chromatography (67:33:1 CHCl<sub>3</sub>/MeOH/Et<sub>3</sub>N) to afford compound **20** as a white solid (25 mg, 90%). <sup>1</sup>H NMR (500 MHz, DMSO-*d*<sub>6</sub>) δ 10.9 (br, 1H), 8.40 (s, 1H), 8.13 (s, 1H), 7.56 (d, *J* = 8.0 Hz, 1H), 7.34 (d, *J* = 8.6 Hz, 1H), 7.26 (br, 2H), 7.21 (d, *J* = 2.3 Hz, 1H), 7.07 (dd, *J* = 8.0, 6.9 Hz, 1H), 6.98 (t, *J* = 7.5 Hz, 1H), 5.92 (d, *J* = 5.7 Hz, 1H), 4.64–4.59 (m, 1H), 4.20–4.15 (m, 2H), 4.14–4.05 (m, 2H), 3.67 (dd, *J* = 8.6, 4.6 Hz, 1H), 3.32 (dd, *J* = 14.9, 4.0 Hz, 1H), 3.03 (dd, *J* = 14.9, 8.6 Hz, 1H), 2.57 (q, *J* = 7.5 Hz, 3H, Et<sub>3</sub>N-CH<sub>2</sub>), 0.97 (d, *J* = 7.5 Hz, 4.5H, Et<sub>3</sub>N-CH<sub>3</sub>). <sup>13</sup>C NMR (125 MHz, DMSO-*d*<sub>6</sub>) δ 172.7, 156.0, 152.7, 149.6, 139.4, 136.3, 127.2, 124.5, 121.0, 118.9, 118.5, 118.3, 111.4, 108.2, 87.1, 82.5, 79.2, 73.5, 70.7, 67.5, 55.7, 45.7, 27.5, 10.9. HRMS (ESI<sup>−</sup>): [M−H]<sup>−</sup> calcd for C<sub>21</sub>H<sub>23</sub>N<sub>8</sub>O<sub>7</sub>S, 531.1410; found, 531.1413.

### Chemical Synthesis of L-Asp-AMS **21**

#### 5'-O-[N-(N-Boc-L-aspartyl (tBu))sulfamoyl]-2',3'-O-isopropylideneadenosine triethylammonium salt (**S2k**)

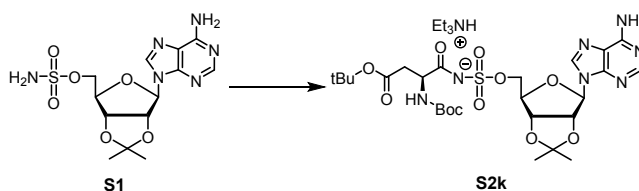

1-Ethyl-3-(3-dimethylaminopropyl)carbodiimide hydrochloride (298 mg, 1.56 mmol) and *N*-hydroxysuccinimide (180 mg, 1.56 mmol) were added to a solution of Boc-Asp(OtBu)-OH (300 mg, 1.04 mmol) in DMF (10 mL). After 22 h, the reaction mixture was diluted with EtOAc. The mixture was washed with 5% citric acid, 5% NaHCO<sub>3</sub>, and brine. The organic layer was dried

over Na<sub>2</sub>SO<sub>4</sub> and evaporated to dryness. Boc-Asp(OtBu)-OSu (75 mg, 0.20 mmol) and cesium carbonate (127 mg, 0.39 mmol) were added to a solution of 5'-*O*-sulfamoyl-2',3'-isopropylideneadenosine **S1** (50 mg, 0.13 mmol) in DMF (2 mL). The solution was stirred at room temperature for 3 h. The reaction mixture was filtered through a pad of Celite. The filtrate was concentrated under reduced pressure. The residue was purified by flash chromatography (94:6:1 EtOAc/MeOH/Et<sub>3</sub>N) to afford compound **S2k** as a white solid (50 mg, 66%). <sup>1</sup>H NMR (500 MHz, CD<sub>3</sub>OD) δ 8.46 (s, 1H), 8.22 (s, 1H), 6.23 (d, *J* = 2.9 Hz, 1H), 5.38–5.34 (m, 1H), 5.14–5.10 (m, 1H), 4.55–4.52 (m, 1H), 4.33–4.28 (m, 1H), 4.25–4.20 (m, 2H), 3.18 (q, *J* = 7.5 Hz, 6H, Et<sub>3</sub>N-CH<sub>2</sub>), 2.75 (dd, *J* = 15.5, 5.2 Hz, 1H), 2.56 (dd, *J* = 15.5, 7.5 Hz, 1H), 1.61 (s, 3H), 1.44–1.37 (m, 21H), 1.28 (t, *J* = 7.5 Hz, 9H, Et<sub>3</sub>N-CH<sub>3</sub>). <sup>13</sup>C NMR (125 MHz, CD<sub>3</sub>OD) δ 178.9, 172.5, 157.4, 157.3, 154.0, 150.5, 141.4, 120.1, 115.2, 91.9, 85.7, 85.6, 83.3, 81.9, 80.2, 69.6, 55.0, 47.8, 40.2, 28.8, 28.4, 27.5, 25.6, 9.2. HRMS (ESI<sup>−</sup>): [M−H]<sup>−</sup> calcd for C<sub>26</sub>H<sub>38</sub>N<sub>7</sub>O<sub>11</sub>S, 656.2350; found, 656.2346.

#### 5'-*O*-*N*-(*L*-Aspartyl)sulfamoyladenosine triethylammonium salt (**21**)

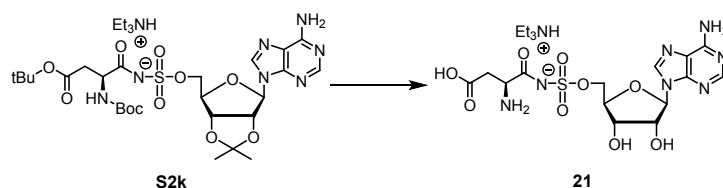

Compound **S2k** (40 mg, 0.053 mmol) was dissolved in a 4:1 (v/v) mixture of TFA and H<sub>2</sub>O at room temperature. After 6 h, the flask was placed on the rotary evaporator and the TFA and H<sub>2</sub>O were removed at reduced pressure. The residue was purified by flash chromatography (67:33:1 CHCl<sub>3</sub>/MeOH/Et<sub>3</sub>N) to afford compound **21** as a white solid (26 mg, 83%). <sup>1</sup>H NMR (500 MHz, DMSO-*d*<sub>6</sub>) δ 8.39 (s, 1H), 8.14 (s, 1H), 7.27 (br, 2H), 5.90 (d, *J* = 6.3 Hz, 1H), 4.60–4.55 (m, 1H), 4.18–4.00 (m, 4H), 3.58–3.54 (m, 1H), 2.86 (q, *J* = 7.5 Hz, 8H, Et<sub>3</sub>N-CH<sub>2</sub>), 2.55 (dd, *J* = 16.6, 4.0 Hz, 1H), 2.36 (dd, *J* = 16.6, 8.6 Hz, 1H), 1.08 (t, *J* = 7.5 Hz, 12H, Et<sub>3</sub>N-CH<sub>3</sub>). <sup>13</sup>C NMR (125 MHz, DMSO-*d*<sub>6</sub>) δ 173.5, 172.3, 156.0, 152.7, 149.6, 139.4, 118.8, 87.0, 82.4, 73.5, 70.6, 67.5, 52.7, 45.4, 36.3, 9.4. HRMS (ESI<sup>−</sup>): [M−H]<sup>−</sup> calcd for C<sub>14</sub>H<sub>18</sub>N<sub>7</sub>O<sub>9</sub>S, 460.0887; found, 460.0882.

#### Chemical Synthesis of L-Glu-AMS **22**

##### 5'-*O*-[*N*-(*N*-Boc-*L*-glutamyl(*t*Bu))sulfamoyl]-2',3'-*O*-isopropylideneadenosine triethylammonium salt (**S2l**)

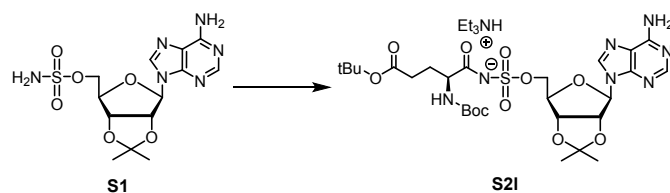

1-Ethyl-3-(3-dimethylaminopropyl)carbodiimide hydrochloride (380 mg, 1.98 mmol) and *N*-hydroxysuccinimide (228 mg, 1.98 mmol) were added to a solution of Boc-Glu(OtBu)-OH (500 mg, 1.65 mmol) in DMF (16 mL). After 24 h, the reaction mixture was diluted with EtOAc. The mixture was washed with 5% citric acid, 5% NaHCO<sub>3</sub>, and brine. The organic layer was dried over Na<sub>2</sub>SO<sub>4</sub> and evaporated to dryness. Boc-Glu(OtBu)-OSu (78 mg, 0.20 mmol) and cesium carbonate (127 mg, 0.39 mmol) were added to a solution of 5'-*O*-sulfamoyl-2',3'-isopropylideneadenosine **S1** (50 mg, 0.13 mmol) in DMF (2 mL). The solution was stirred at room temperature for 3 h. The reaction mixture was filtered through a pad of Celite. The filtrate was concentrated under reduced pressure. The residue was purified by flash chromatography (95:5:1 to 91:9:1 EtOAc/MeOH/Et<sub>3</sub>N) to afford compound **S2I** as a white solid (76 mg, 76%). <sup>1</sup>H NMR (500 MHz, CD<sub>3</sub>OD) δ 8.46 (s, 1H), 8.22 (s, 1H), 6.23 (d, *J* = 2.9 Hz, 1H), 5.37–5.33 (m, 1H), 5.12–5.08 (m, 1H), 4.56–4.51 (m, 1H), 4.27–4.21 (m, 2H), 4.04–3.97 (m, 1H), 3.18 (q, *J* = 7.5 Hz, 6H, Et<sub>3</sub>N-CH<sub>2</sub>), 2.34–3.22 (m, 2H), 2.11–2.01 (m, 1H), 1.89–1.80 (m, 1H), 1.61 (s, 3H), 1.46–1.35 (m, 21H), 1.28 (t, *J* = 7.5 Hz, 9H, Et<sub>3</sub>N-CH<sub>3</sub>). <sup>13</sup>C NMR (125 MHz, CD<sub>3</sub>OD) δ 180.0, 174.3, 157.5, 157.3, 154.0, 150.5, 141.4, 120.1, 115.2, 91.8, 85.7, 85.5, 83.3, 81.4, 80.1, 69.7, 57.4, 47.8, 32.8, 29.8, 28.8, 28.3, 27.5, 25.6, 9.2. HRMS (ESI<sup>−</sup>): [M-H]<sup>−</sup> calcd for C<sub>27</sub>H<sub>40</sub>N<sub>7</sub>O<sub>11</sub>S, 670.2507; found, 670.2509.

#### 5'-*O*-*N*-(*L*-Glutamyl)sulfamoyladenosine triethylammonium salt (**22**)

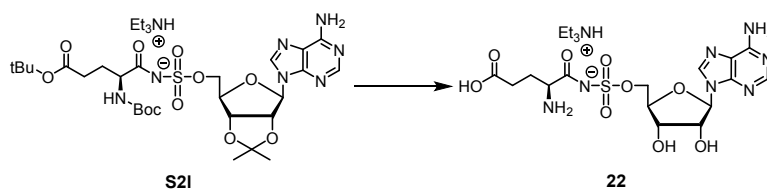

Compound **S2I** (40 mg, 0.052 mmol) was dissolved in a 4:1 (v/v) mixture of TFA and H<sub>2</sub>O at room temperature. After 3 h, the flask was placed on the rotary evaporator and the TFA and H<sub>2</sub>O were removed at reduced pressure. The residue was purified by flash chromatography (67:33:1 CHCl<sub>3</sub>/MeOH/Et<sub>3</sub>N to 100:1 MeOH/Et<sub>3</sub>N) to afford compound **22** as a white solid (32 mg, 98%). <sup>1</sup>H NMR (500 MHz, DMSO-*d*<sub>6</sub>) δ 8.37 (s, 1H), 8.14 (s, 1H), 7.26 (br, 2H), 5.90 (d, *J* = 5.7 Hz, 1H), 4.60–4.57 (m, 1H), 4.17–4.04 (m, 4H), 3.44 (dd, *J* = 6.8, 4.6 Hz, 1H), 2.70 (q, *J*

= 7.5 Hz, 9H, Et<sub>3</sub>N-CH<sub>2</sub>), 2.39–2.21 (m, 2H), 2.00–1.91 (m, 1H), 1.85–1.77 (m, 1H), 1.02 (d, *J* = 7.5 Hz, 15H, Et<sub>3</sub>N-CH<sub>3</sub>). <sup>13</sup>C NMR (125 MHz, DMSO-*d*<sub>6</sub>) δ 175.2, 172.6, 156.0, 152.6, 149.6, 139.3, 118.9, 87.0, 82.5, 73.5, 70.7, 67.5, 54.7, 45.5, 32.1, 27.1, 10.2. HRMS (ESI<sup>−</sup>): [M−H]<sup>−</sup> calcd for C<sub>15</sub>H<sub>20</sub>N<sub>7</sub>O<sub>9</sub>S, 474.1043.; found, 474.1045.

### Chemical Synthesis of L-Lys-AMS 23

#### 5'-O-[N-(N-Boc-L-lysyl(ε-Boc))sulfamoyl]-2',3'-O-isopropylideneadenosine triethylammonium salt (**S2m**)

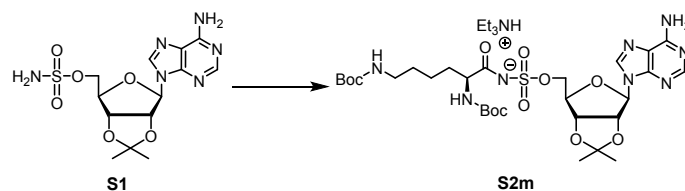

Boc-Lys(Boc)-OSu (127 mg, 0.20 mmol) and cesium carbonate (127 mg, 0.39 mmol) were added to a solution of 5'-O-sulfamoyl-2',3'-isopropylideneadenosine **S1** (50 mg, 0.13 mmol) in DMF (10 mL). The solution was stirred at room temperature for 12 h. The reaction mixture was filtered through a pad of Celite. The filtrate was concentrated under reduced pressure. The residue was purified by flash chromatography (90:10:1 CHCl<sub>3</sub>/MeOH/Et<sub>3</sub>N) to afford compound **S2m** as a white solid (106 mg, 98%). <sup>1</sup>H NMR (500 MHz, CD<sub>3</sub>OD) δ 8.51 (s, 1H), 8.21 (s, 1H), 6.23 (d, *J* = 3.4 Hz, 1H), 5.34 (dd, *J* = 5.7, 3.4 Hz, 1H), 5.10 (d, *J* = 4.6 Hz, 1H), 4.56 (dd, *J* = 5.2, 3.5 Hz, 1H), 4.27–4.20 (m, 2H), 4.01–3.95 (m, 1H), 3.14 (q, *J* = 7.5 Hz, 12H, Et<sub>3</sub>N-CH<sub>2</sub>), 3.04–2.99 (m, 2H), 1.82–1.72 (m, 2H), 1.61 (s, 3H), 1.49–1.42 (m, 22H), 1.39 (s, 3H), 1.28 (t, *J* = 7.5 Hz, 18H, Et<sub>3</sub>N-CH<sub>3</sub>). <sup>13</sup>C NMR (125 MHz, CDCl<sub>3</sub>) δ 180.9, 158.4, 157.6, 157.6, 157.3, 154.0, 150.4, 120.1, 115.2, 91.7, 85.7, 85.6, 83.2, 80.0, 79.7, 69.7, 58.0, 47.7, 41.1, 34.3, 34.2, 34.1, 30.6, 28.8, 27.5, 25.6, 24.1, 9.32. HRMS (ESI<sup>+</sup>): [M+H]<sup>+</sup> calcd for C<sub>29</sub>H<sub>47</sub>N<sub>8</sub>O<sub>11</sub>S, 715.3080; found, 715.3039.

#### 5'-O-(N-L-lysyl)sulfamoyladenosine triethylammonium salt (**23**)

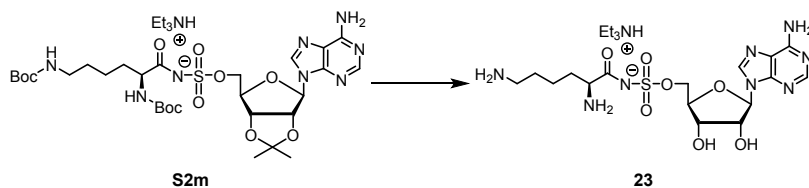

Compound **S2m** (50 mg, 0.070 mmol) was dissolved in a 4:1 (v/v) mixture of TFA and H<sub>2</sub>O at

room temperature. After 10 h, the flask was placed on the rotary evaporator and the TFA and H<sub>2</sub>O were removed at reduced pressure. The residue was purified by HPLC [COSMISIL 5C<sub>18</sub>-PAQ: C-18 reverse-phase column,  $\phi$  10 mm  $\times$  250 mm, aqueous TFA (0.01%), 3.0 mL/min, 220 nm,  $t_R$ : 9.5 min] to afford compound **23** as a colorless oil (20 mg, 61%). <sup>1</sup>H NMR (500 MHz, CD<sub>3</sub>OD)  $\delta$  8.63 (s, 1H), 8.41 (s, 1H), 6.14 (d,  $J$  = 4.6 Hz, 1H), 4.64 (t,  $J$  = 4.9 Hz, 1H), 4.47–4.39 (m, 3H), 4.33 (dd,  $J$  = 7.5, 2.9 Hz, 1H), 3.78 (t,  $J$  = 5.7 Hz, 1H), 3.21 (q,  $J$  = 7.5 Hz, 3H, Et<sub>3</sub>N-CH<sub>2</sub>), 2.94 (t,  $J$  = 7.8 Hz, 2H), 2.00–1.86 (m, 2H), 1.74–1.68 (m, 2H), 1.58–1.49 (m, 2H), 1.31 (t,  $J$  = 7.5 Hz, 4.5H, Et<sub>3</sub>N-CH<sub>3</sub>). <sup>13</sup>C NMR (125 MHz, CD<sub>3</sub>OD)  $\delta$  174.1, 152.3, 150.1, 146.2, 143.6, 120.2, 90.2, 84.2, 76.2, 71.8, 70.0, 56.0, 47.8, 40.3, 31.7, 28.0, 22.8, 9.1. HRMS (ESI<sup>+</sup>): [M+H]<sup>+</sup> calcd for C<sub>14</sub>H<sub>22</sub>N<sub>8</sub>O<sub>7</sub>S, 475.1718; found, 475.1691.

### Chemical Synthesis of L-Arg-AMS 24

#### 5'-O-[N-(N-Boc-L-arginyl (Boc)<sub>2</sub>)sulfamoyl]-2',3'-O-isopropylideneadenosine triethylammonium salt (**S2n**)

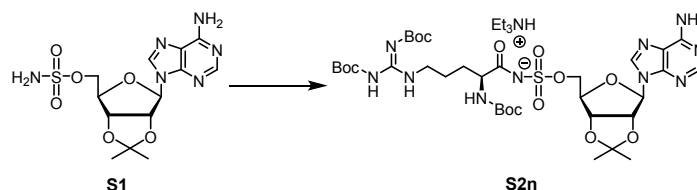

1-Ethyl-3-(3-dimethylaminopropyl)carbodiimide hydrochloride (150 mg, 0.76 mmol) and *N*-hydroxsuccinimide (87 mg, 0.76 mmol) were added to a solution of Boc-Arg(Boc)<sub>2</sub>-OH (300 mg, 0.63 mmol) in THF (6 mL) at room temperature. After 15 h, the solvent was evaporated in vacuo. The residue was purified by flash chromatography (9:1 to 3:1 EtOAc/hexane) to afford Boc-Arg(Boc)<sub>2</sub>-OSu as a white solid (250 mg, 68%). Boc-Arg(Boc)<sub>2</sub>-OSu (110 mg, 0.19 mmol) and cesium carbonate (127 mg, 0.39 mmol) were added to a solution of 5'-O-sulfamoyl-2',3'-isopropylideneadenosine **S1** (50 mg, 0.13 mmol) in DMF (2 mL). The solution was stirred at room temperature for 1 h. The reaction mixture was concentrated under reduced pressure. The residue was purified by flash chromatography (95:5:1 to 90:10:1 EtOAc/MeOH/Et<sub>3</sub>N) to afford compound **S2n** as a white solid (99 mg, 78%). <sup>1</sup>H NMR (500 MHz, CD<sub>3</sub>OD):  $\delta$  8.48 (s, 1H), 8.22 (s, 1H), 6.23 (d,  $J$  = 3.0 Hz, 1H), 5.33 (dd,  $J$  = 6.0, 3.0 Hz, 1H), 5.09 (dd,  $J$  = 5.0, 3.0 Hz, 1H), 4.52 (dd,  $J$  = 6.0, 3.5 Hz, 1H), 4.23 (d,  $J$  = 3.5 Hz, 2H), 4.04–3.94 (m, 1H), 3.94–3.76 (m, 3H), 3.17 (q,  $J$  = 7.5 Hz, 6 H, Et<sub>3</sub>N-CH<sub>2</sub>), 1.78 (br, 1H), 1.63 (br, 3H), 1.61 (s, 3H), 1.54 (s, 3H), 1.51 (s, 9H), 1.46 (s, 9H), 1.44–1.36 (m, 9H), 1.27 (t,  $J$  = 7.5 Hz, 9H, Et<sub>3</sub>N-CH<sub>3</sub>). <sup>13</sup>C NMR (125 MHz, CD<sub>3</sub>OD):  $\delta$  180.4, 157.5, 157.3, 156.14, 156.11, 154.0, 150.5, 141.4, 120.1, 115.3, 91.7, 85.8, 85.5, 85.1, 85.0, 83.2, 80.0, 79.9, 69.7, 57.9, 47.7, 45.8, 31.7, 28.8, 28.7, 28.3,

27.3, 26.3, 26.2, 25.6, 9.2. HRMS (ESI<sup>-</sup>): [M-H]<sup>-</sup> calcd for C<sub>34</sub>H<sub>53</sub>N<sub>10</sub>O<sub>13</sub>S, 841.3520; found, 841.3521.

#### 5'-O-N-(L-arginyl)sulfamoyladenine (24)

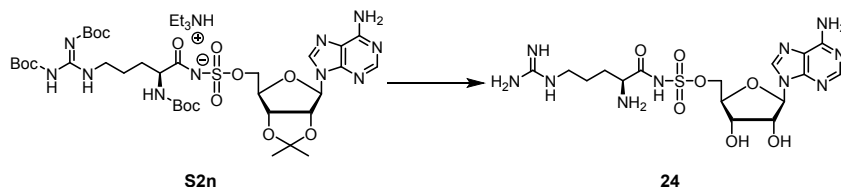

Compound **S2n** (40 mg, 0.10 mmol) was dissolved in a 4:1 (v/v) mixture of TFA and H<sub>2</sub>O at room temperature. After 2 h, the flask was placed on the rotary evaporator and the TFA and H<sub>2</sub>O were removed at reduced pressure. The residue was purified by flash chromatography (50:50:1 CHCl<sub>3</sub>/MeOH/Et<sub>3</sub>N to 100:1 MeOH/Et<sub>3</sub>N) to afford compound **24** as a white solid (14 mg, 70%). <sup>1</sup>H NMR (500 MHz, CD<sub>3</sub>OD): δ 8.52 (s, 1H), 8.20 (s, 1H), 6.09 (d, *J* = 2.5 Hz, 1H), 4.64 (t, *J* = 5.0 Hz, 1H), 4.40 (t, *J* = 4.5 Hz, 1H), 4.36 (dd, *J* = 11.0, 3.0 Hz, 1H), 4.34–4.27 (m, 2H), 3.34–3.32 (m, 1H), 3.16 (t, *J* = 6.5 Hz, 2H), 1.82–1.70 (m, 1H), 1.70–1.60 (m, 3H). <sup>13</sup>C NMR (500 MHz, DMSO-*d*<sub>6</sub>) δ 178.6, 156.8, 156.0, 152.6, 149.6, 139.4, 118.8, 86.8, 82.7, 73.7, 70.7, 67.2, 56.1, 40.6, 31.8, 25.2. HRMS (ESI<sup>-</sup>): [M-H]<sup>-</sup> calcd for C<sub>16</sub>H<sub>25</sub>N<sub>10</sub>O<sub>7</sub>S, 501.1634; found, 501.1639.

#### Chemical Synthesis of L-His-AMS 25

##### 5'-O-[N-(N-Boc-L-histidyl(1-Boc))sulfamoyl]-2',3'-O-isopropylideneadenosine triethylammonium salt (**S2o**)

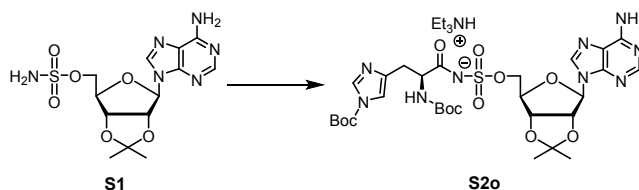

Boc-His(Boc)-OSu (88 mg, 0.20 mmol) and cesium carbonate (127 mg, 0.39 mmol) were added to a solution of 5'-O-sulfamoyl-2',3'-isopropylideneadenosine **S1** (50 mg, 0.13 mmol) in DMF (10 mL). The solution was stirred at room temperature for 12 h. The reaction mixture was filtered through a pad of Celite. The filtrate was concentrated under reduced pressure. The residue was purified by flash chromatography (95:5:1 to 83:17:1 EtOAc/MeOH/Et<sub>3</sub>N) to afford compound **S2o** as a white solid (55 mg, 59%). <sup>1</sup>H NMR (500 MHz, CD<sub>3</sub>OD) δ 8.47 (s, 1H),

8.21 (s, 1H), 8.03 (s, 1H), 6.23 (d,  $J = 3.4$  Hz, 1H), 5.36–5.31 (m, 1H), 5.11–5.07 (m, 1H), 4.55–4.51 (m, 1H), 4.30–4.19 (m, 3H), 3.18 (q,  $J = 7.5$  Hz, 6H, Et<sub>3</sub>N-CH<sub>2</sub>), 3.10–3.01 (m, 1H), 2.93–2.85 (m, 1H), 1.61 (s, 3H), 1.58 (s, 9H), 1.39–1.36 (m, 12H), 1.27 (t,  $J = 7.5$  Hz, 9H, Et<sub>3</sub>N-CH<sub>3</sub>). <sup>13</sup>C NMR (125 MHz, CD<sub>3</sub>OD)  $\delta$  179.5, 157.4, 157.3, 154.0, 150.5, 148.2, 141.4, 140.7, 137.8, 120.1, 116.0, 115.2, 91.8, 86.8, 85.7, 85.5, 83.3, 80.1, 69.7, 57.6, 47.8, 32.8, 28.8, 28.6, 28.0, 27.5, 25.6, 9.2. HRMS (ESI<sup>−</sup>): [M-H]<sup>−</sup> calcd for C<sub>29</sub>H<sub>40</sub>N<sub>9</sub>O<sub>11</sub>S, 722.2568; found, 722.2571.

### 5'-O-N-(L-histidyl)sulfamoyladenine triethylammonium salt (**25**)

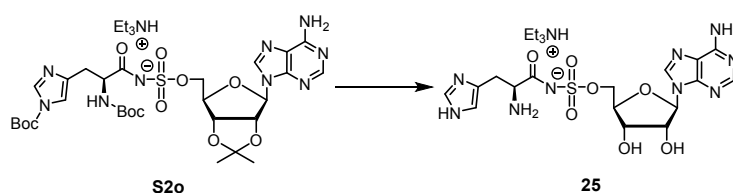

Compound **S2o** (40 mg, 0.061 mmol) was dissolved in a 4:1 (v/v) mixture of TFA and H<sub>2</sub>O at room temperature. After 3 h, the flask was placed on the rotary evaporator and the TFA and H<sub>2</sub>O were removed at reduced pressure. The residue was purified by flash chromatography (67:33:1 CHCl<sub>3</sub>/MeOH/Et<sub>3</sub>N to 100:1 MeOH/Et<sub>3</sub>N) to afford compound **25** as a white solid (17 mg, 74%). <sup>1</sup>H NMR (500 MHz, DMSO-*d*<sub>6</sub>)  $\delta$  8.37 (s, 1H), 8.13 (s, 1H), 7.61 (s, 1H), 7.27 (br, 2H), 6.93 (s, 1H), 5.91 (d,  $J = 5.7$  Hz, 1H), 4.62–4.57 (m, 1H), 4.19–4.14 (m, 1H), 4.13–4.07 (m, 2H), 4.04–4.00 (m, 1H), 3.63 (dd,  $J = 9.2, 3.4$  Hz, 1H), 3.11 (dd,  $J = 14.9, 3.4$  Hz, 1H), 2.81 (dd,  $J = 14.9, 9.2$  Hz, 1H), 2.66 (q,  $J = 7.5$  Hz, 4H, Et<sub>3</sub>N-CH<sub>2</sub>), 1.01 (t,  $J = 7.5$  Hz, 6H, Et<sub>3</sub>N-CH<sub>3</sub>). <sup>13</sup>C NMR (125 MHz, DMSO-*d*<sub>6</sub>)  $\delta$  171.9, 156.0, 152.7, 149.6, 139.4, 135.0, 118.9, 87.0, 82.5, 73.5, 70.7, 67.4, 55.6, 45.7, 28.7, 10.6. HRMS (ESI<sup>−</sup>): [M-H]<sup>−</sup> calcd for C<sub>16</sub>H<sub>21</sub>N<sub>9</sub>O<sub>7</sub>S, 482.1206; found, 482.1212.

## Chemical Biology Procedures

**Protein Expression and Materials:** Recombinant proteins *holo*-GrsA and *holo*-TycB1 were expressed and purified as described previously.<sup>7,8,9,10</sup> Recombinant *holo*-GrsA and *holo*-TycB1 were overproduced and isolated as C-terminal His-tagged constructs using the *E. coli* overexpression strain, BL21 (DE3), kindly provided by Prof. Mohamed A. Marahiel at Philipps-Universität Marburg, Germany.

### Hydroxamate-MesG Assay<sup>1</sup>

*Standard assay conditions:* Reactions contained *holo*-GrsA (140–1400 nM) to maintain initial

velocity conditions, 20 mM Tris (pH 8.0), 2.5 mM ATP, 1 mM MgCl<sub>2</sub>, 1 mM TCEP, 150 mM hydroxylamine (pH 7.0), 0.1 U purine nucleoside phosphorylase (Sigma–Aldrich, N8264), 0.04 U inorganic pyrophosphatase (Sigma–Aldrich, I1643), 0.2 mM MesG (Berry & Associates) and varying concentrations of substrates. The reactions (100 µL) were run in 96-well half-area plates (Corning, 3881) and the cleavage of MesG was monitored at  $A_{355}$  on an EnVision Multilabel Reader (PerkinElmer). Working stocks of hydroxylamine were prepared fresh by combining 500 µL of 4 M hydroxylamine, 250 µL of water and 250 µL of 7 M NaOH on ice.

*Determination of kinetic parameters:* Steady-state kinetic parameters of the substrates were determined for *holo*-GrsA using standard assay conditions as described above. GrsA was used at 700 nM with L-Leu (0.625–10 mM), 1.4 µM with L-Thr (25–300 nM), 140 nM with L-Met (2.5–100 mM), 700 nM with L-Trp (0.125–2.0 mM), and 1.4 µM with L-His (3.125–100 mM). TycB1 was used at 400 nM with L-Pro (10–2000 µM). In all experiments, the total DMSO concentration was kept at or below 2.0%. Initial velocities were fit to the Michaelis-Menten equation using Prism 5 (GraphPad Software).

**Bacterial strains:** *A. migulanus* ATCC 9999 and DSM 5759 were obtained from the American Type Culture Collection (ATCC) and Deutsche Sammlung von Mikroorganismen und Zellkulturen (DSMZ), respectively.

**Cultivation media:** YPG media comprises yeast extract (50 g/L), Bacto Peptone (50 g/L), and glucose (5 g/L).<sup>11</sup>

**Preparation of Cellular Lysates for Proteomic Labeling Experiments:** *A. migulanus* ATCC 9999 and DSM 5756 were maintained on nutrient agar. Single colonies were used to inoculate YPG medium and cultures were shaken for 24 h at 37 °C. The seed culture (2 mL) was transferred to YPG media (250 mL) and the resulting mixture was incubated at 37 °C. Growth was routinely monitored at  $A_{660}$  on a U-2910 spectrophotometer (Hitachi). The cells were harvested by centrifugation and stored in the freezer until used. The frozen cell pellets were resuspended in Tris pH 8.0 (20 mM), MgCl<sub>2</sub> (1 mM), TCEP (1 mM), NP-40 (0.05%), and a protease inhibitor cocktail. Because of the lability of the synthetase during mechanical cell disruption processes,<sup>12</sup> a gentle treatment of cells with lysozyme (0.2 mg/mL) was used to release intracellular protein. The cell suspension was incubated at 0 °C for 30 min. The mixture was then incubated at 30 °C for 30 min. The solution was centrifuged for 5 min at 15,000 rpm and the pellets were discarded. The total protein concentration was quantitated by the method of Bradford.<sup>13</sup>

**Competitive ABPP of the A-domain of endogenous GrsA in a complex proteome:** *A. migulanus* ATCC 9999 proteome (2.0 mg/mL) was individually treated with inhibitors **6–25** (100  $\mu$ M from a 10 mM stock in DMSO) in 20 mM Tris (pH 8.0), 1 mM MgCl<sub>2</sub>, 1 mM TCEP, 0.05% NP-40, 0.2 mg/mL lysozyme and the protease inhibitor cocktail. These samples were incubated for 10 min at room temperature and subsequently treated with probe **1** (1  $\mu$ M from a 100  $\mu$ M stock in DMSO). In all experiments, the total DMSO concentration was kept at 2.2%. After 10 min at room temperature, these samples were irradiated at 365 nm for 30 min on ice. To initiate the click reaction, rhodamine (Rh)-azide, TCEP, TBTA ligand, and CuSO<sub>4</sub> were added to provide final concentrations of 100  $\mu$ M, 1 mM, 100  $\mu$ M, and 1 mM, respectively. After 1 h at room temperature, 5 $\times$  SDS-loading buffer (strong reducing) was added and the samples were heated at 95  $^{\circ}$ C for 5 min. Samples were separated by 1D SDS-PAGE and fluorescent gel visualization was performed using a Typhoon 9410 Gel and Blot Imager (GE Healthcare). IC<sub>50</sub> values for the A-domain of GrsA were determined from dose–response curves from two trials at each inhibitor concentration (L-Phe-AMS **6**: 1 nM to 10  $\mu$ M; L-Leu-AMS **12**: 10 nM to 1 mM; L-Met-AMS **18**: 10 nM to 1 mM; L-Trp-AMS **20**: 10 nM to 1 mM; L-His-AMS **25**: 10 nM to 1 mM; L-Thr-AMS **17**: 10 nM to 1 mM; L-Lys-AMS **23**: 10 nM to 1 mM) using Prism 5 (GraphPad Software).

**Competitive ABPP of the A-domain of recombinant GrsA:** Recombinant GrsA (1  $\mu$ M) were individually treated with inhibitors **6–25** (100  $\mu$ M from a 10 mM stock in DMSO) in 20 mM Tris (pH 8.0), 1 mM MgCl<sub>2</sub>, 1 mM TCEP, and 0.0025% NP-40. These samples were incubated for 10 min at room temperature and subsequently treated with probe **1** (1  $\mu$ M from a 100  $\mu$ M stock in DMSO). In all experiments, the total DMSO concentration was kept at 2.2%. After 10 min at room temperature, these samples were irradiated at 365 nm for 30 min on ice and reacted with Rh-azide for 1 h at room temperature. Reactions were treated with 5 $\times$  SDS-loading buffer (strong reducing) and subjected to SDS-PAGE. Fluorescent gel visualization was performed using a Typhoon 9410 Gel and Blot Imager (GE Healthcare). IC<sub>50</sub> values for the A-domain of GrsA were determined from dose–response curves from two trials at each inhibitor concentration (L-Phe-AMS **6**: 1 nM to 100  $\mu$ M; L-Leu-AMS **12**: 10 nM to 1 mM; L-Met-AMS **18**: 10 nM to 1 mM; L-Trp-AMS **20**: 10 nM to 1 mM; L-His-AMS **25**: 10 nM to 1 mM; L-Thr-AMS **17**: 10 nM to 1 mM; L-Lys-AMS **23**: 10 nM to 1 mM) using Prism 5 (GraphPad Software).

**Competitive ABPP of the A-domains of endogenous GrsB in a complex proteome:** *A. migulanus* DSM 5759 proteome (2.0 mg/mL) was individually treated with inhibitors **6–25** (100  $\mu$ M from a 10 mM stock in DMSO) in 20 mM Tris (pH 8.0), 1 mM MgCl<sub>2</sub>, 1 mM TCEP, 0.05% NP-40, 0.2 mg/mL lysozyme, and the protease inhibitor cocktail. These samples were incubated

for 10 min at room temperature and subsequently treated with individual members of probes **2–5** (1  $\mu$ M from a 100  $\mu$ M stock in DMSO). In all experiments, the total DMSO concentration was kept at 2.2%. After 10 min at room temperature, these samples were irradiated at 365 nm for 5 min on ice and reacted with Rh-azide for 1 h at room temperature. Reactions were treated with 5 $\times$  SDS-loading buffer (strong reducing) and subjected to SDS-PAGE. Fluorescent gel visualization was performed using a Typhoon 9410 Gel and Blot Imager (GE Healthcare). IC<sub>50</sub> values for the L-Pro activating domain of GrsB were determined from dose–response curves from two trials at various inhibitor concentrations (L-Pro-AMS **7**: 0.01 nM to 10  $\mu$ M; L-Orn-AMS **8**: 100 nM to 1 mM; L-Gln-AMS **15**: 100 nM to 1 mM). IC<sub>50</sub> values for the L-Orn activating domain of GrsB were determined from dose–response curves from two trials at each inhibitor concentration (L-Orn-AMS **8**: 0.1 pM to 100 nM; L-Gln-AMS **15**: 100 nM to 1 mM; L-Lys-AMS **23**: 100 nM to 1 mM; L-Arg-AMS **24**: 100 nM to 1 mM). IC<sub>50</sub> values for the L-Val activating domain of GrsB were estimated from dose–response curves from two trials at each inhibitor concentration (L-Val-AMS **11**: 0.1 nM to 100  $\mu$ M; L-Leu-AMS **12**: 100 nM to 100  $\mu$ M; L-Ile-AMS **13**: 100 nM to 100  $\mu$ M; L-Met-AMS **18**: 100 nM to 100  $\mu$ M; L-Trp-AMS **20**: 100 nM to 100  $\mu$ M; L-His-AMS **25**: 100 nM to 100  $\mu$ M). IC<sub>50</sub> values for the L-Leu activating domain of GrsB were estimated from dose–response curves from two trials at each inhibitor concentration (L-Leu-AMS **12**: 0.1 nM to 100  $\mu$ M; L-Met-AMS **18**: 100 nM to 100  $\mu$ M).

**Competitive ABPP of the A-domain of recombinant TycB1:** Recombinant TycB1 (1  $\mu$ M) were individually treated with inhibitors **6–25** (100  $\mu$ M from a 10 mM stock in DMSO) in 20 mM Tris (pH 8.0), 1 mM MgCl<sub>2</sub>, 1 mM TCEP, and 0.0025% NP-40. These samples were incubated for 10 min at room temperature and subsequently treated with probe **2** (1  $\mu$ M from a 100  $\mu$ M stock in DMSO). In all experiments, the total DMSO concentration was kept at 2.2%. After 10 min at room temperature, these samples were irradiated at 365 nm for 30 min on ice and reacted with Rh-azide for 1 h at room temperature. Reactions were treated with 5 $\times$  SDS-loading buffer (strong reducing) and subjected to SDS-PAGE. Fluorescent gel visualization was performed using a Typhoon 9410 Gel and Blot Imager (GE Healthcare). IC<sub>50</sub> values for the A-domain of TycB1 were determined from dose–response curves from two trials at each inhibitor concentration (L-Pro-AMS **7**: 1 nM to 100  $\mu$ M; L-Orn-AMS **8**: 100 nM to 1 mM; L-Gln-AMS **15**: 100 nM to 1 mM) using Prism 5 (GraphPad Software).

## References

1. Wilson, D. J.; Aldrich, C. C. A continuous kinetic assay for adenylation enzyme activity and inhibition. *Anal. Chem.* **2010**, 404, 56–63.
2. Mootz, H. D. and Marahiel, M. A. The tyrocidine biosynthesis operon of *Bacillus brevis*: complete nucleotide sequence and biochemical characterization of functional internal adenylation domains. *J. Bacteriol.* **1997**, 179, 6843–6850
3. Neres, J.; Labello, N. P.; Somu, R. V.; Boshoff, H. I.; Wilson, D. J.; Vannada, J.; Chen, L.; Barry, C. E., III; Bennett, E. M.; Aldrich, C. C. Inhibition of siderophore biosynthesis in *Mycobacterium tuberculosis* with nucleoside bisubstrate analogues: Structure-activity relationships of the nucleobase domain of 5'-O-[N-(salicyl)sulfamoyl]adenosine. *J. Med. Chem.* **2008**, 51, 5349–5370.
4. Gottlieb, H. E.; Kotlyar, V.; Nudelman, A. NMR chemical shifts of common laboratory solvents as trace impurities. *J. Org. Chem.* **1997**, 62, 7512–7515.
5. Still, W. C.; Kahn, A.; Mitra, A. Rapid chromatographic technique for preparative separations with moderate resolution. *J. Org. Chem.* **1978**, 43, 2923–2925.
6. Brown, P.; Richardson, C. M.; Mensah, L. M.; O'Hanlon, P. J.; Osborne, N. F.; Pope, A. J.; Walker, G. Molecular recognition of tyrosinyl adenylate analogues by prokaryotic tyrosyl tRNA synthetases. *Bioorg. Med. Chem.* **1999**, 7, 2473–2485.
7. Stachelhaus, T.; Hüser, A.; Marahiel, M. A. Biochemical characterization of peptidyl carrier protein (PCP), the thiolation domain of multifunctional peptide synthetases. *Chem. Biol.* **1996**, 3, 913–921.
8. Stachelhaus, T.; Mootz, H.; Bergendahl, V.; Marahiel, M. A. Peptide bond formation in nonribosomal peptide biosynthesis. *J. Biol. Chem.* **1998**, 273, 22773–22781.
9. Ishikawa, F.; Kakeya, H. Specific enrichment of nonribosomal peptide synthetase module by an affinity probe for adenylation domains. *Bioorg. Med. Chem. Lett.* **2014**, 24, 865–869.
10. Konno, S.; Ishikawa, F.; Suzuki, T.; Dohmae, N.; Burkart, M. D.; Kakeya, H. Active site-directed proteomic probes for adenylation domains in nonribosomal peptide synthetases. *Chem. Commun.* **2015**, 51, 2262–2265.
11. Matteo, C. C.; Glade, M.; Tanaka, A.; Piret, J.; Demain, A. L. Microbiological studies on the formation of gramicidin S synthetases. *Biotechnol. Bioeng.* **1975**, 17, 129–142.
12. Augenstein, D. C.; Thrasher, K. D.; Sinskey, A. J.; Wang, D. I. C. Optimization in the recovery of a labile intracellular enzyme. *Biotechnol. Bioeng.* **1974**, 16, 1433–1447.
13. Bradford, M. M. A rapid and sensitive method for the quantitation of microgram quantities of protein utilizing the principle of protein-dye binding. *Anal. Biochem.* **1976**, 72, 248–254.

<sup>1</sup>H-NMR (500 MHz) and <sup>13</sup>C-NMR (125 MHz) spectra of **S2a**

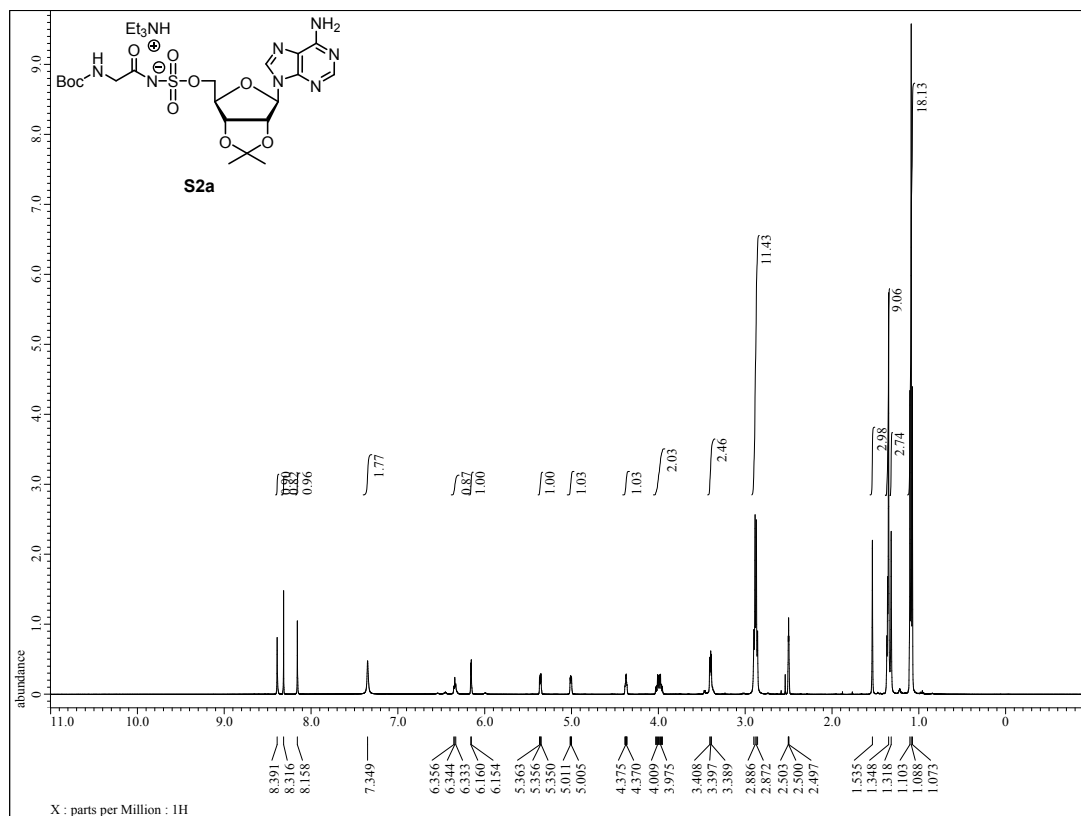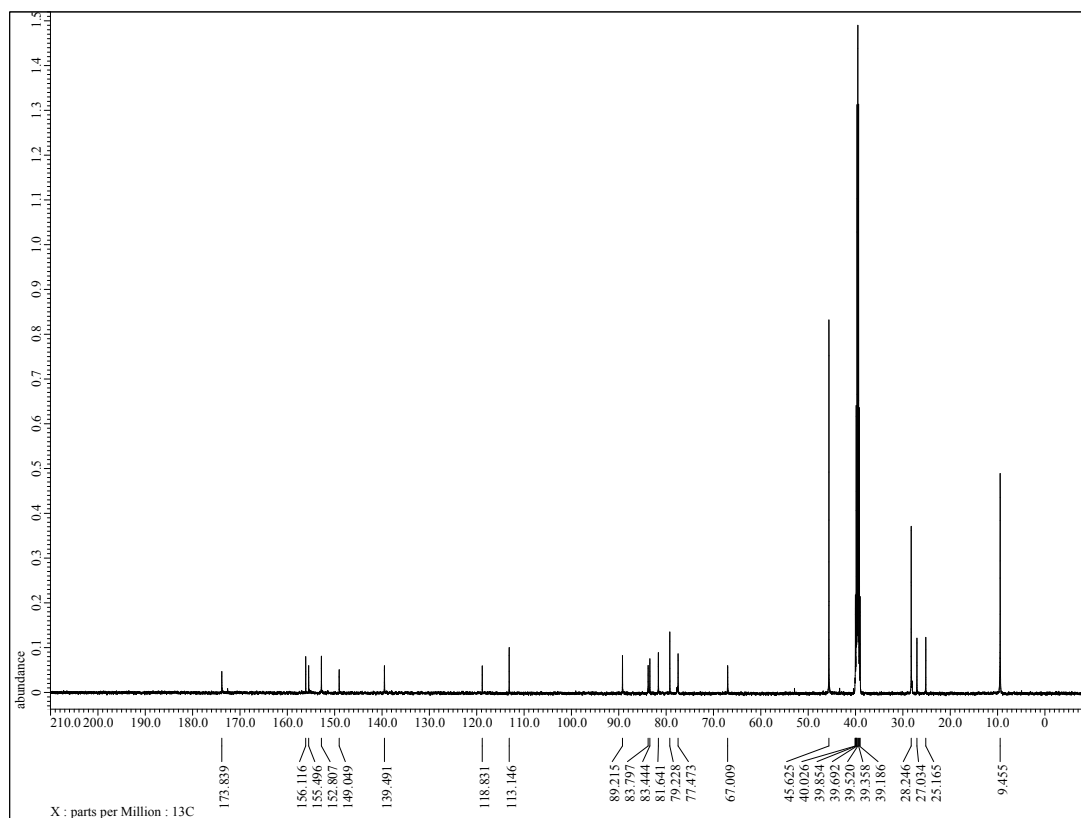

$^1\text{H}$ -NMR (500 MHz) and  $^{13}\text{C}$ -NMR (125 MHz) spectra of **9**

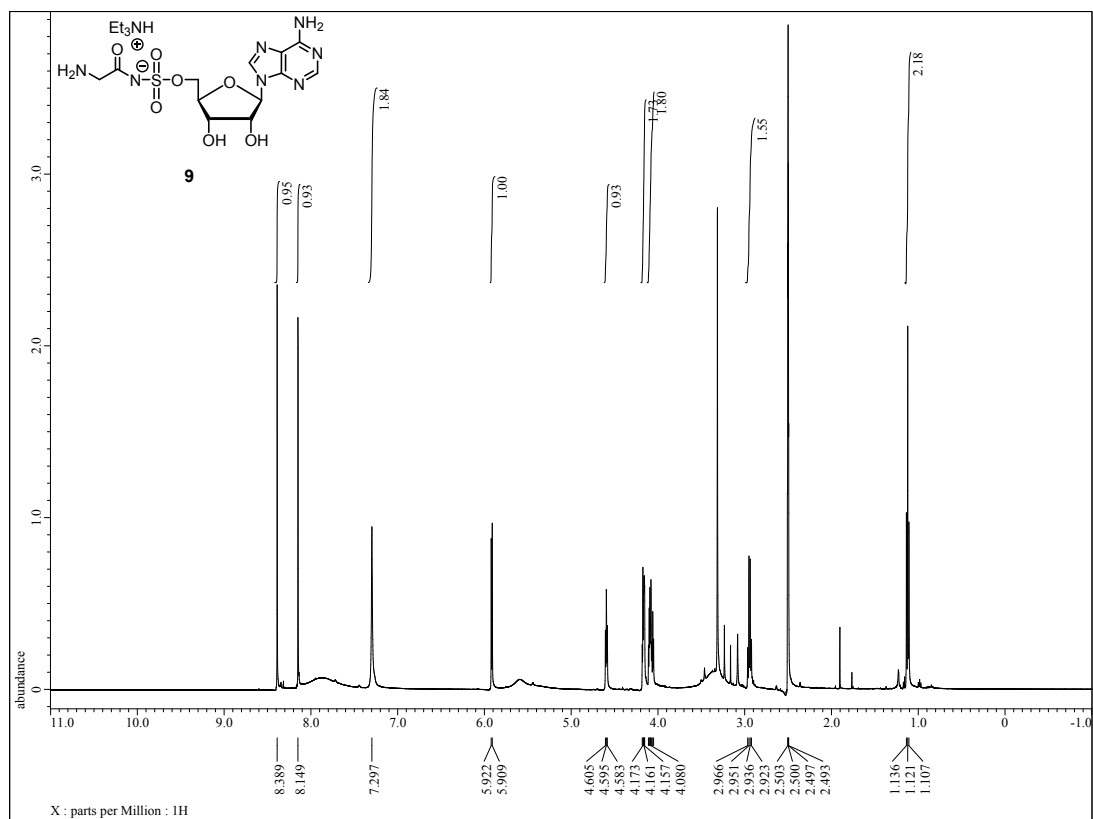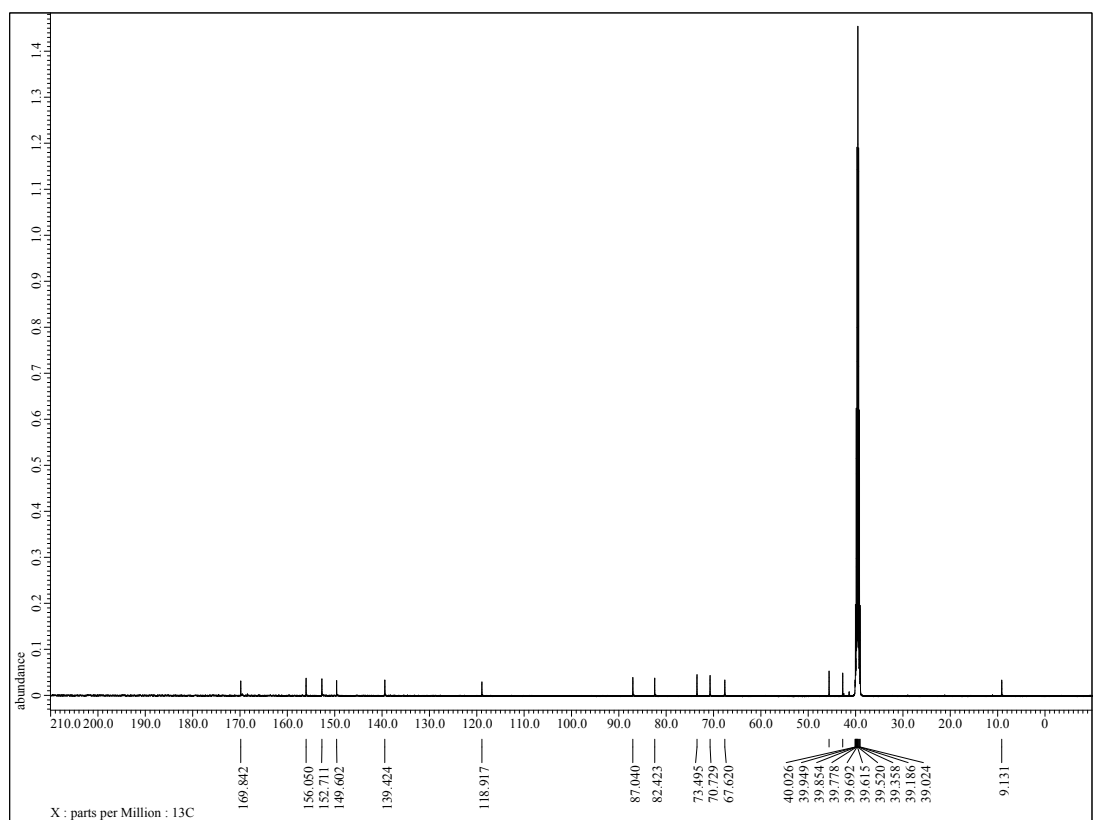

$^1\text{H}$ -NMR (500 MHz) and  $^{13}\text{C}$ -NMR (125 MHz) spectra of **S2b**

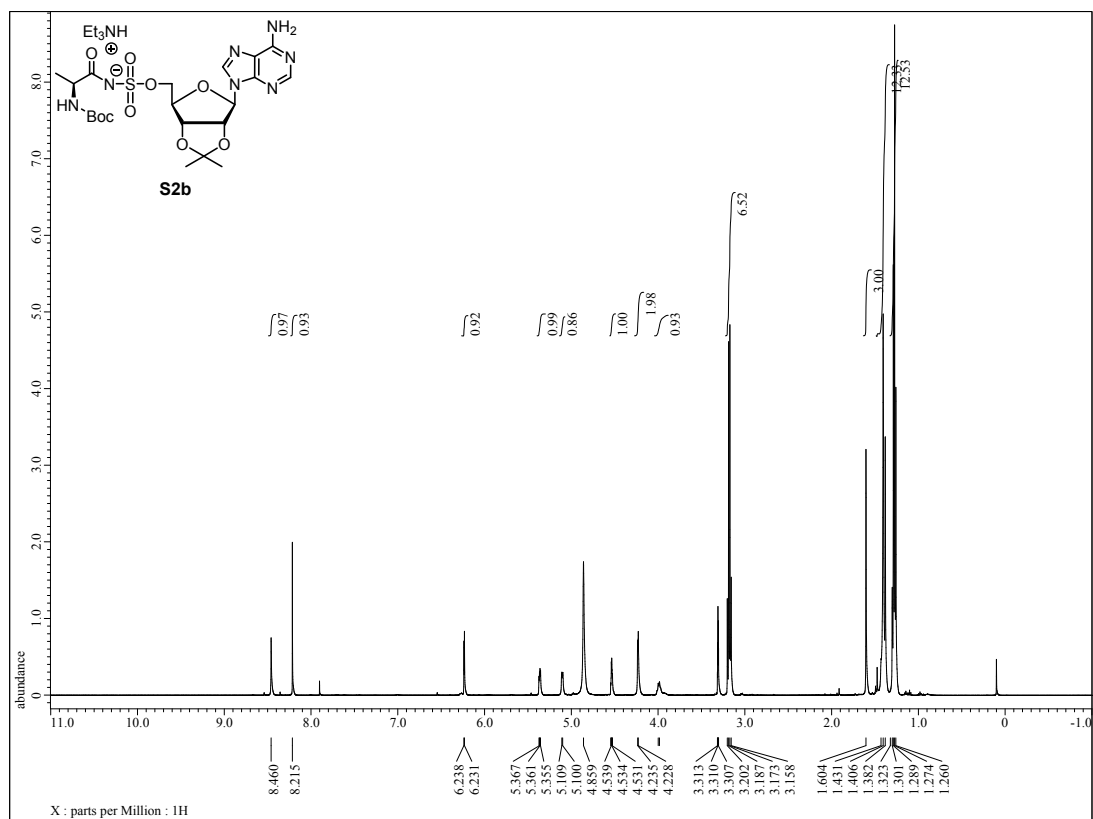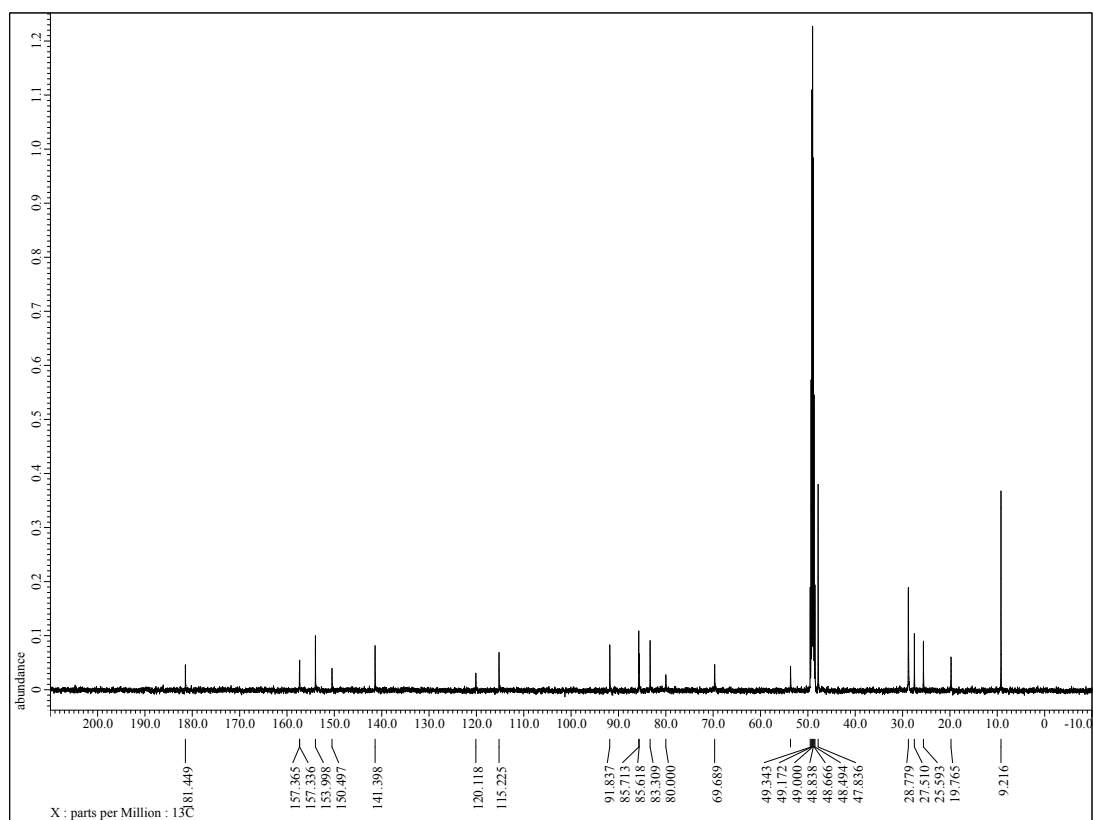

$^1\text{H}$ -NMR (500 MHz) and  $^{13}\text{C}$ -NMR (125 MHz) spectra of **10**

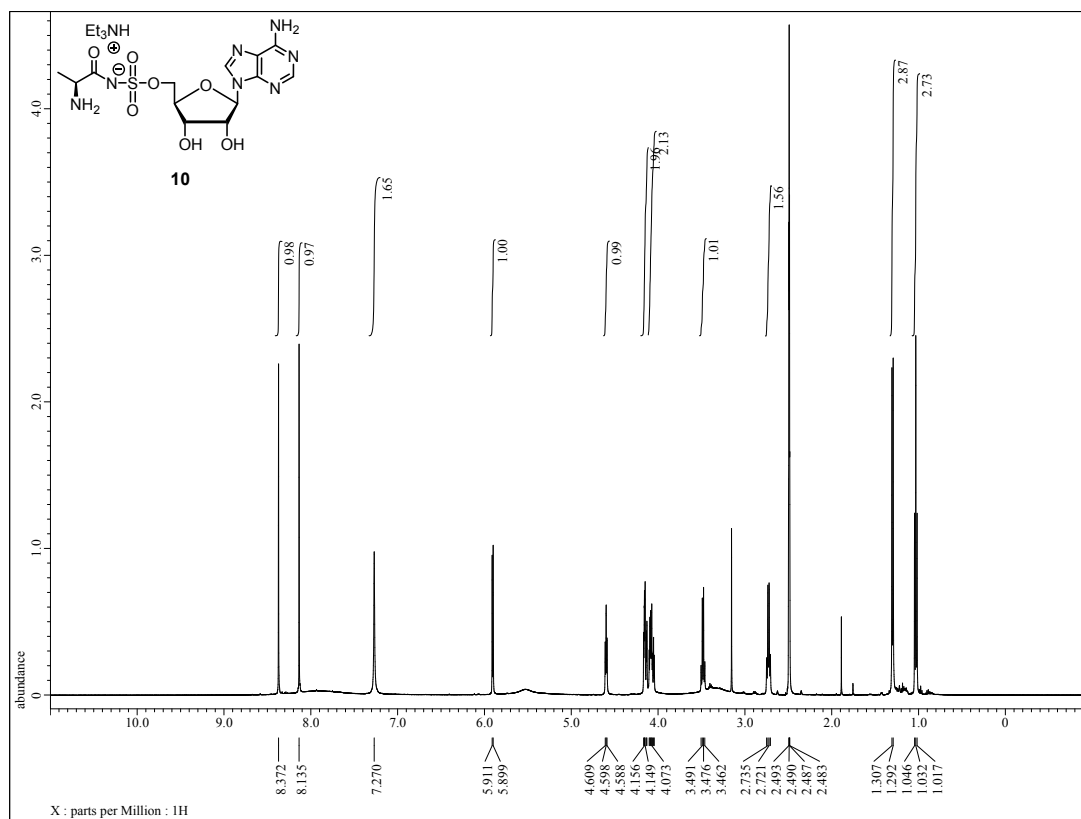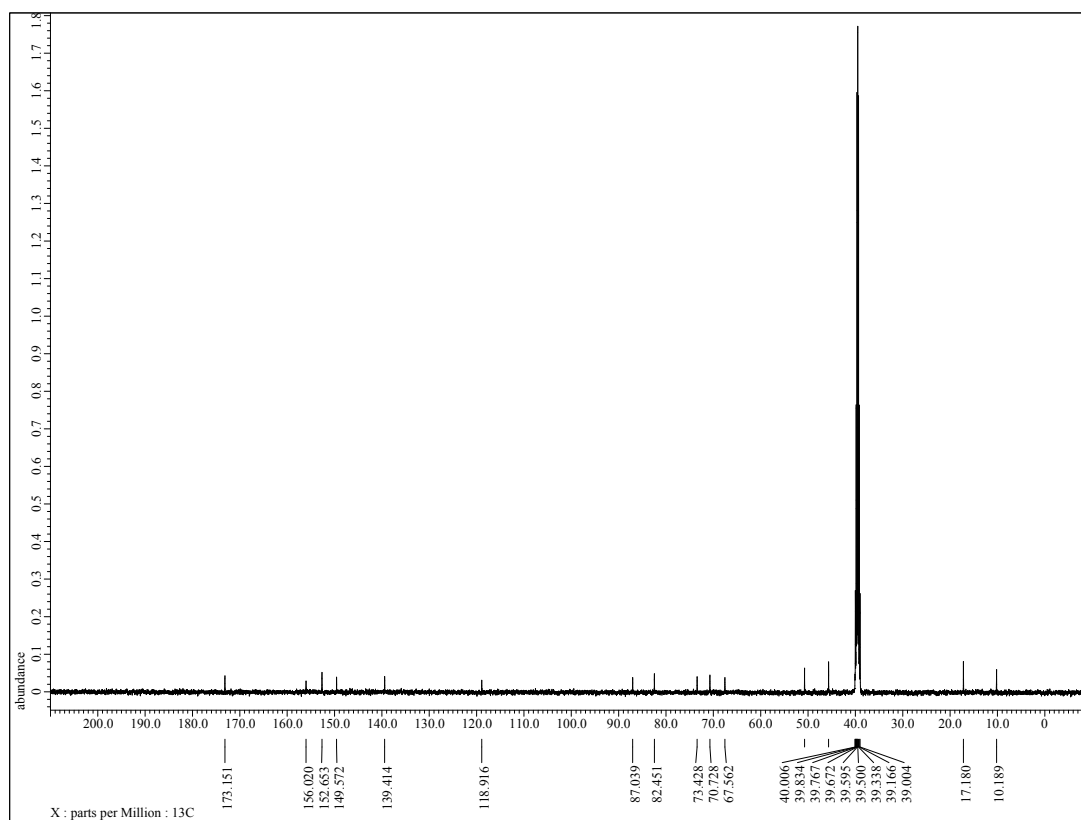

$^1\text{H}$ -NMR (500 MHz) and  $^{13}\text{C}$ -NMR (125 MHz) spectra of **S2c**

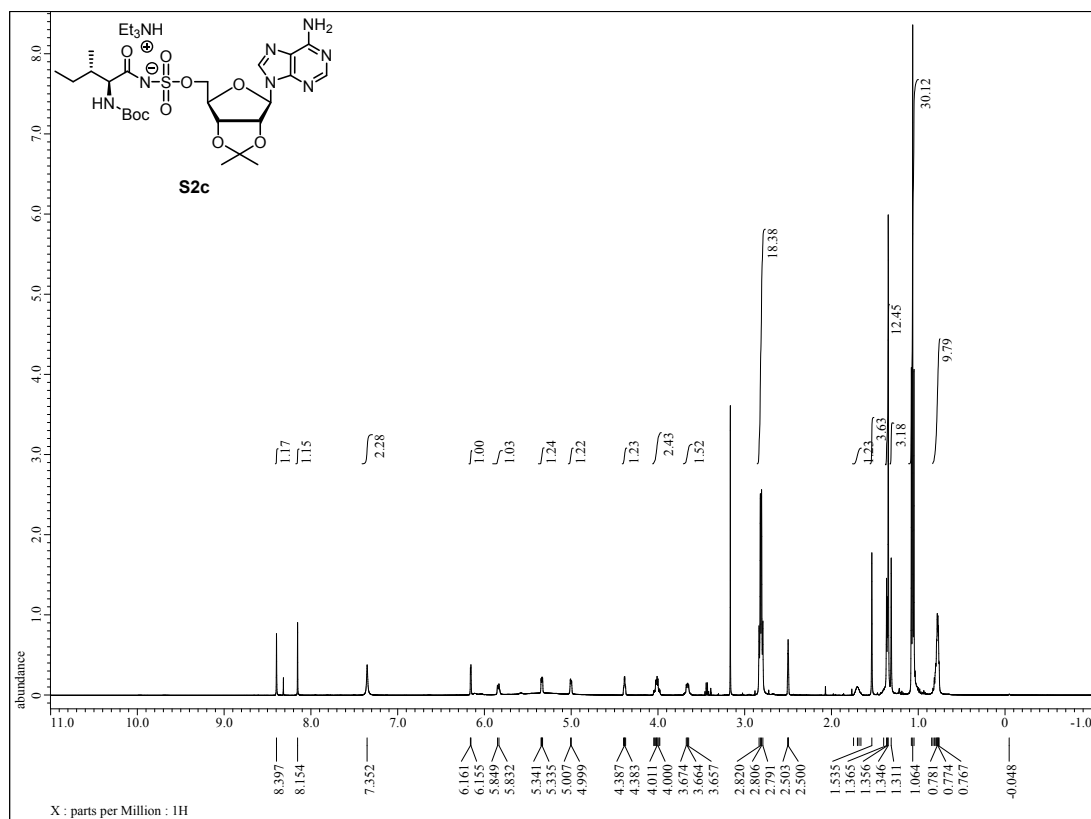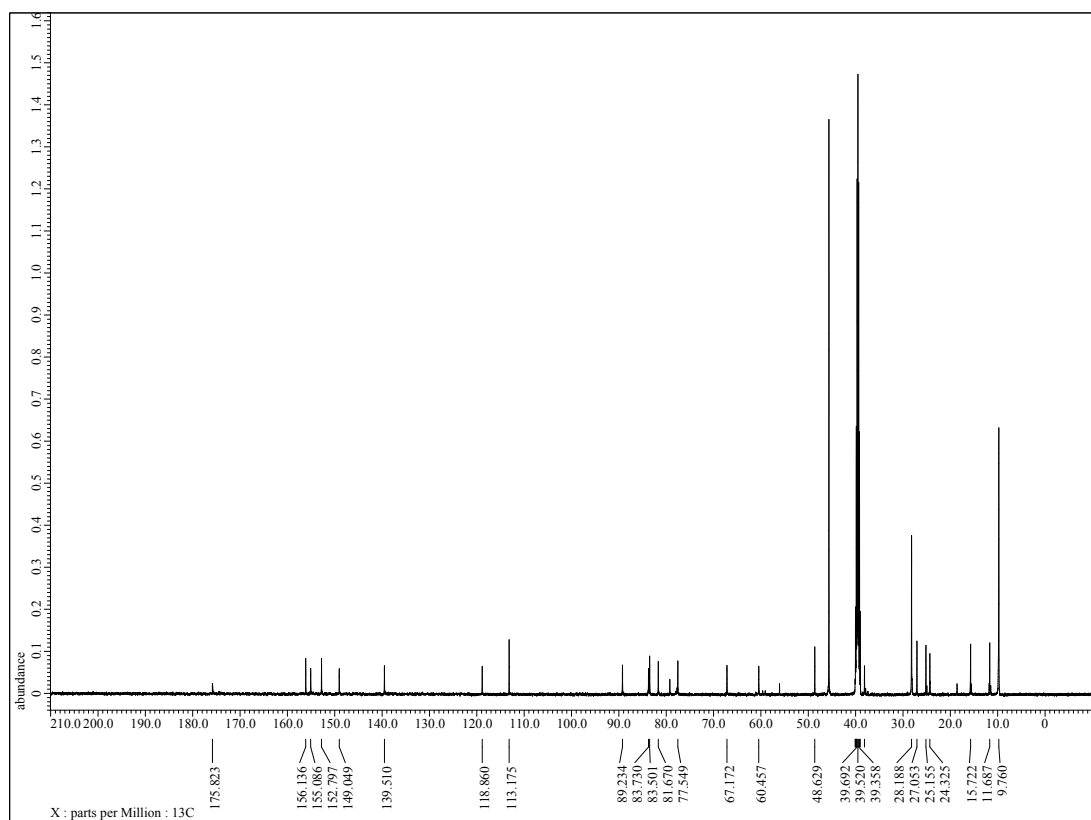

$^1\text{H}$ -NMR (500 MHz) and  $^{13}\text{C}$ -NMR (125 MHz) spectra of **13**

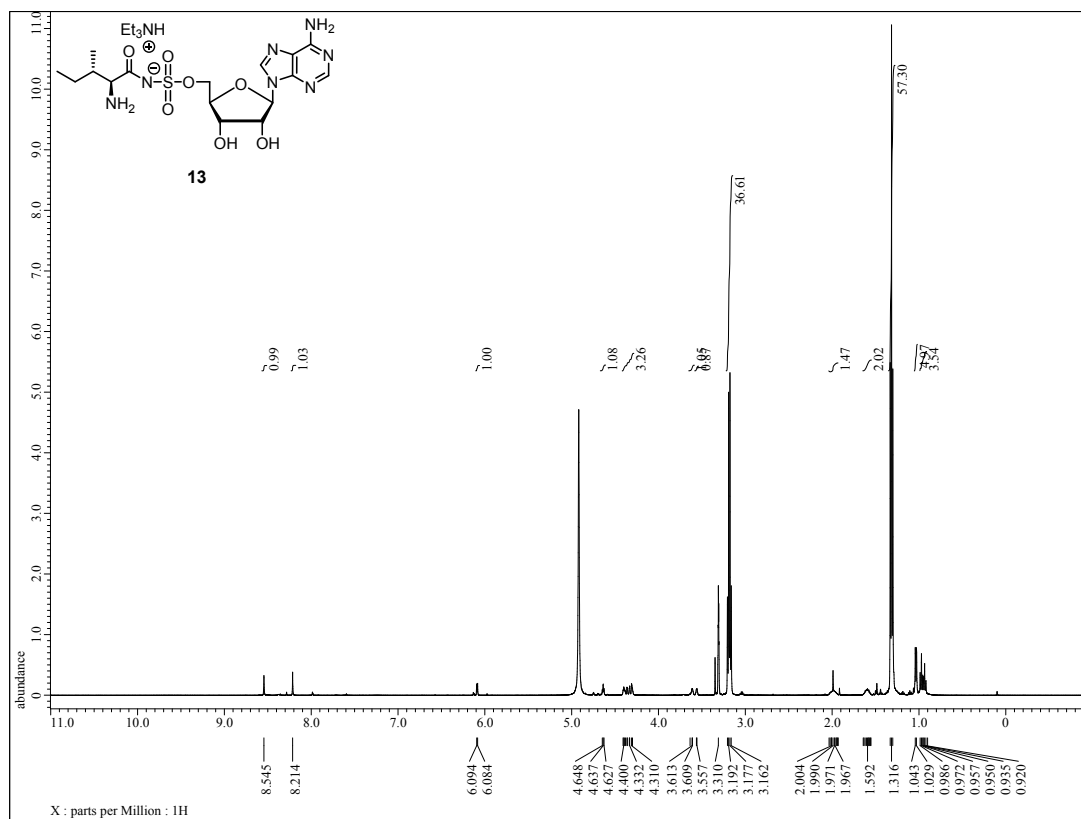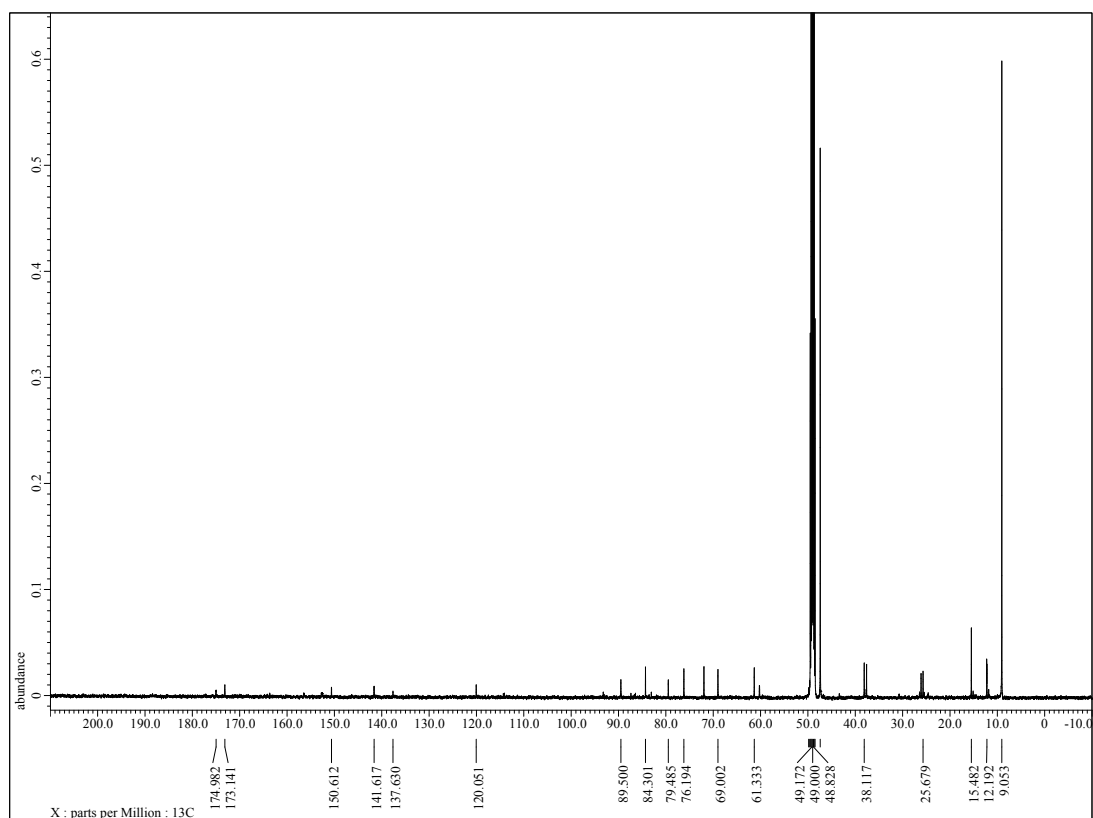

$^1\text{H}$ -NMR (500 MHz) and  $^{13}\text{C}$ -NMR (125 MHz) spectra of **S2d**

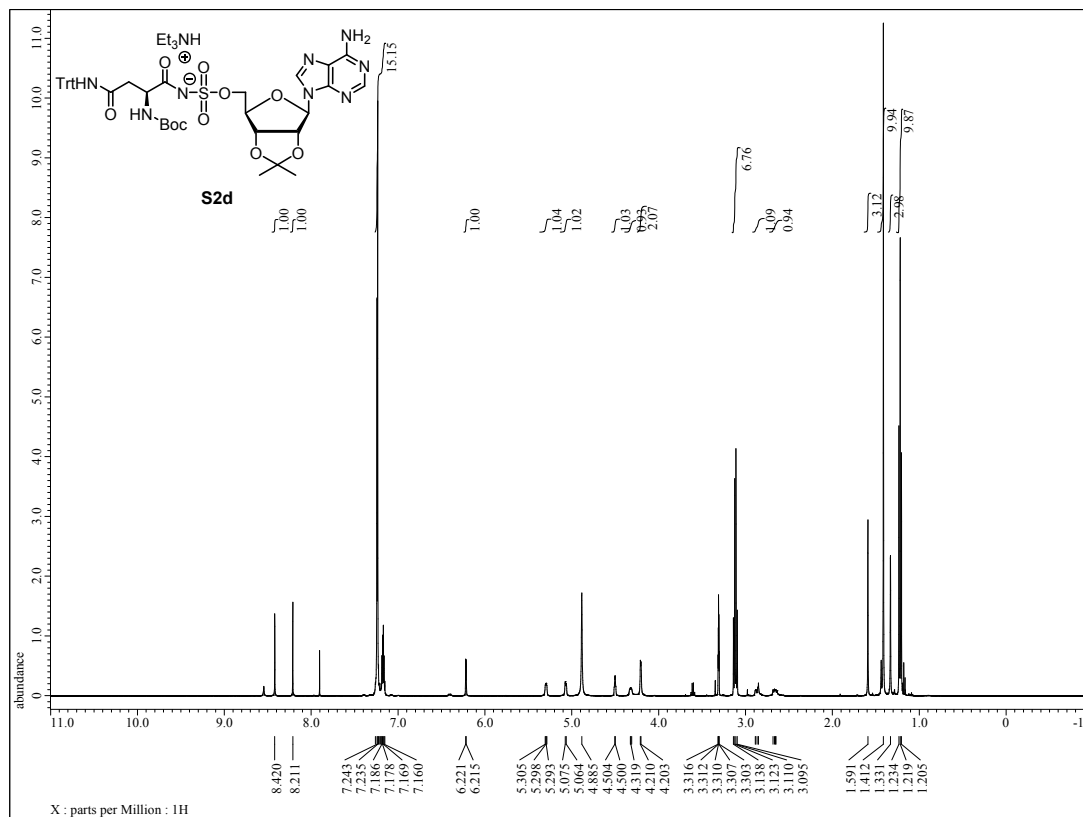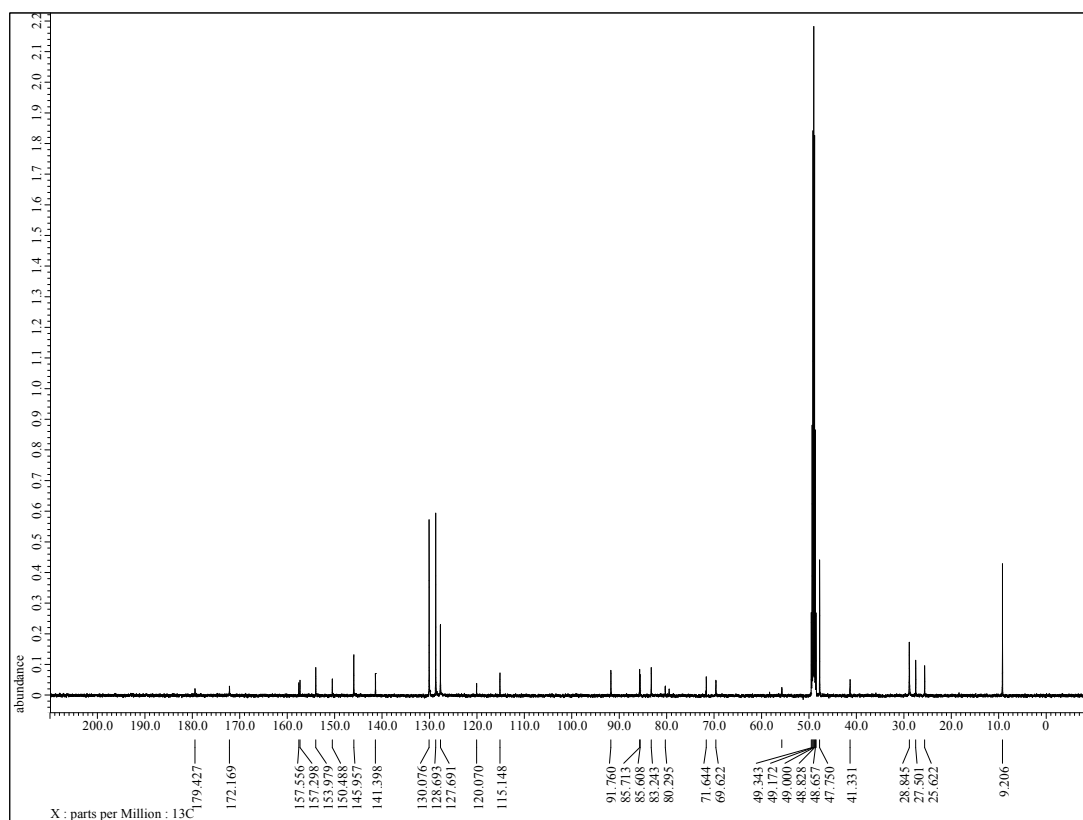

$^1\text{H}$ -NMR (500 MHz) and  $^{13}\text{C}$ -NMR (125 MHz) spectra of **14**

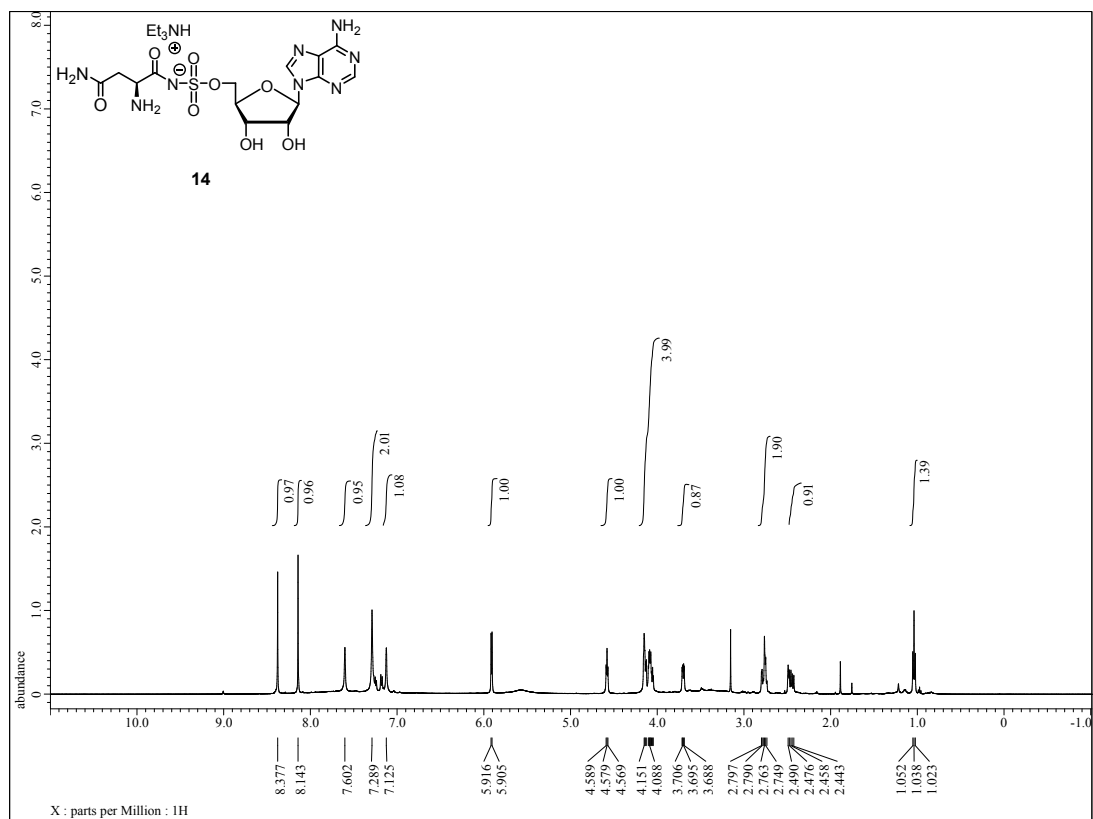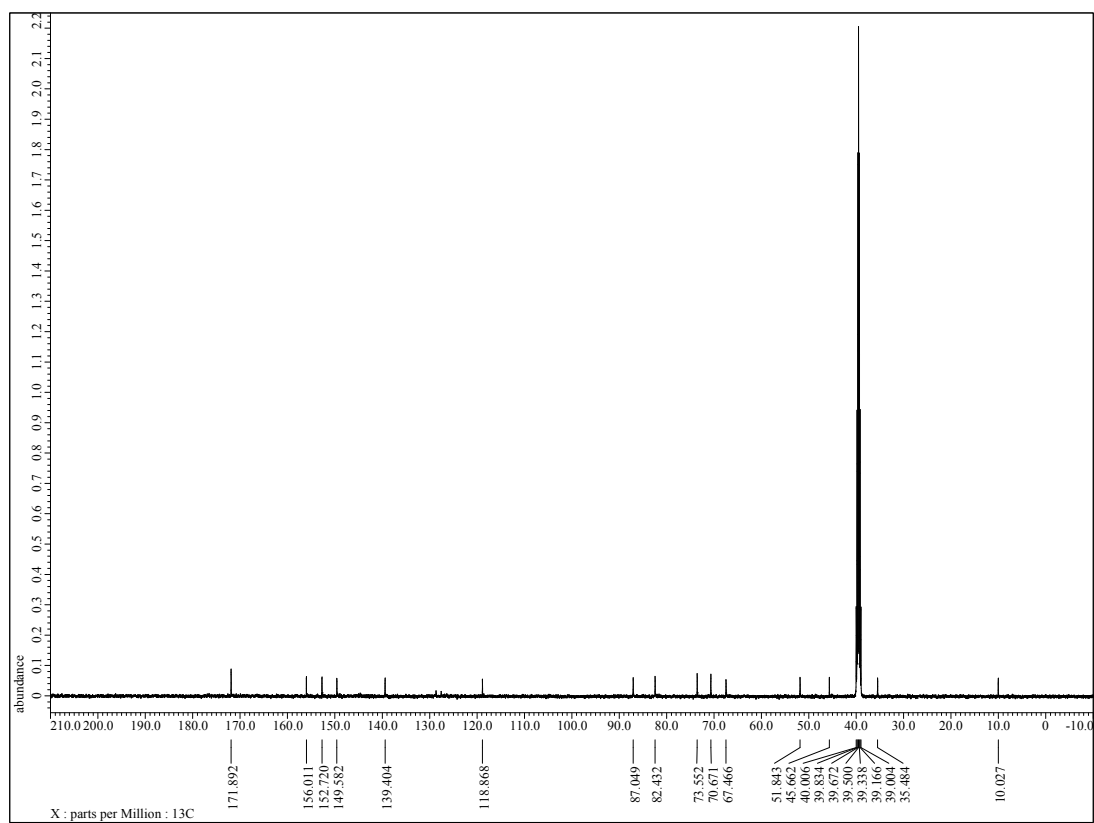

$^1\text{H}$ -NMR (500 MHz) and  $^{13}\text{C}$ -NMR (125 MHz) spectra of **S2e**

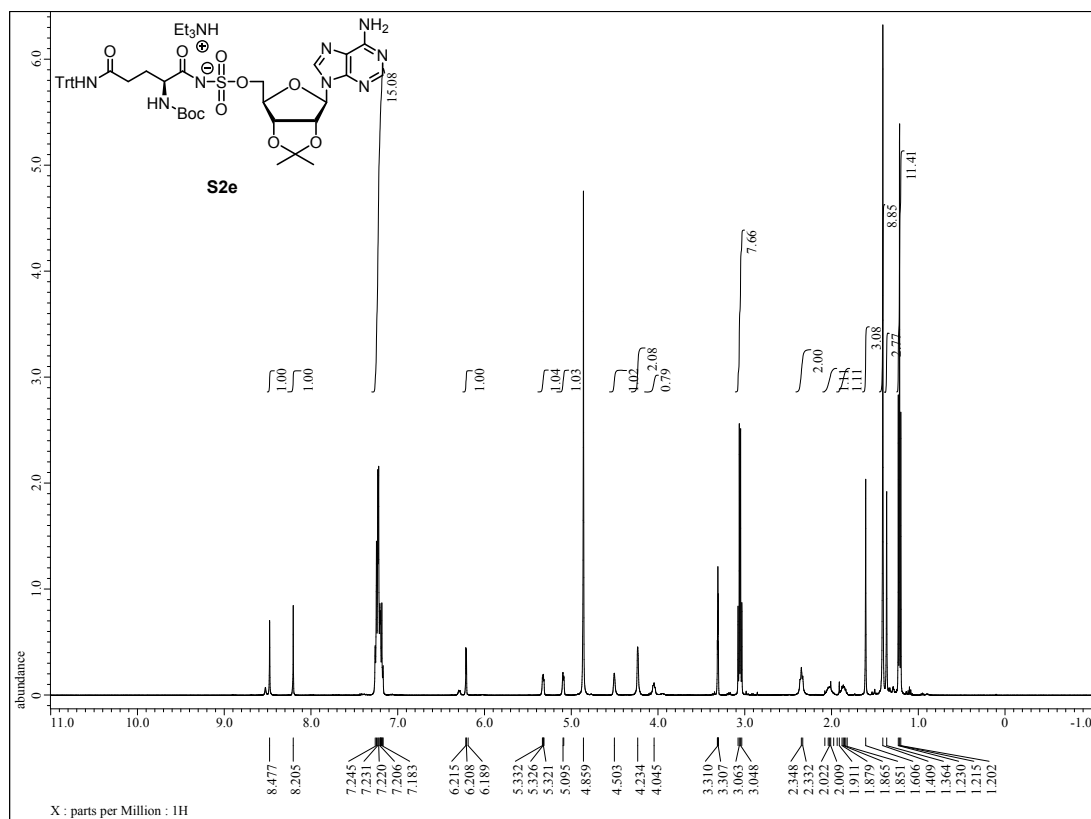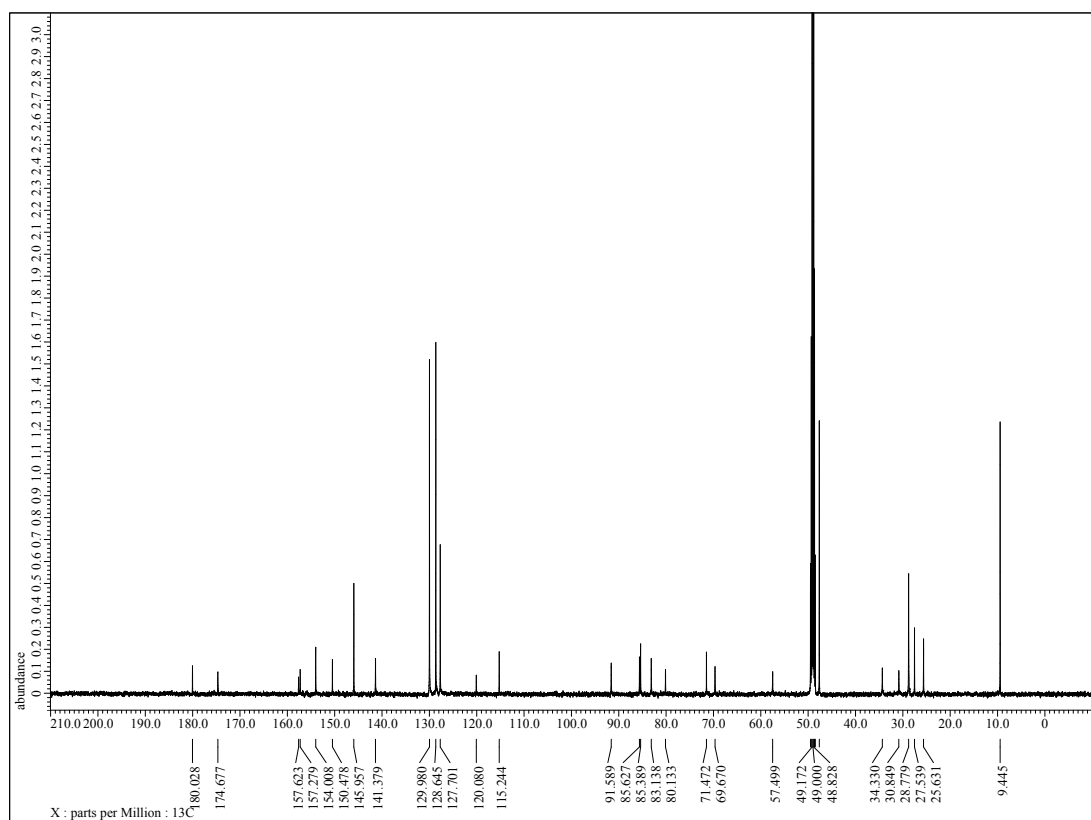

$^1\text{H}$ -NMR (500 MHz) and  $^{13}\text{C}$ -NMR (125 MHz) spectra of **15**

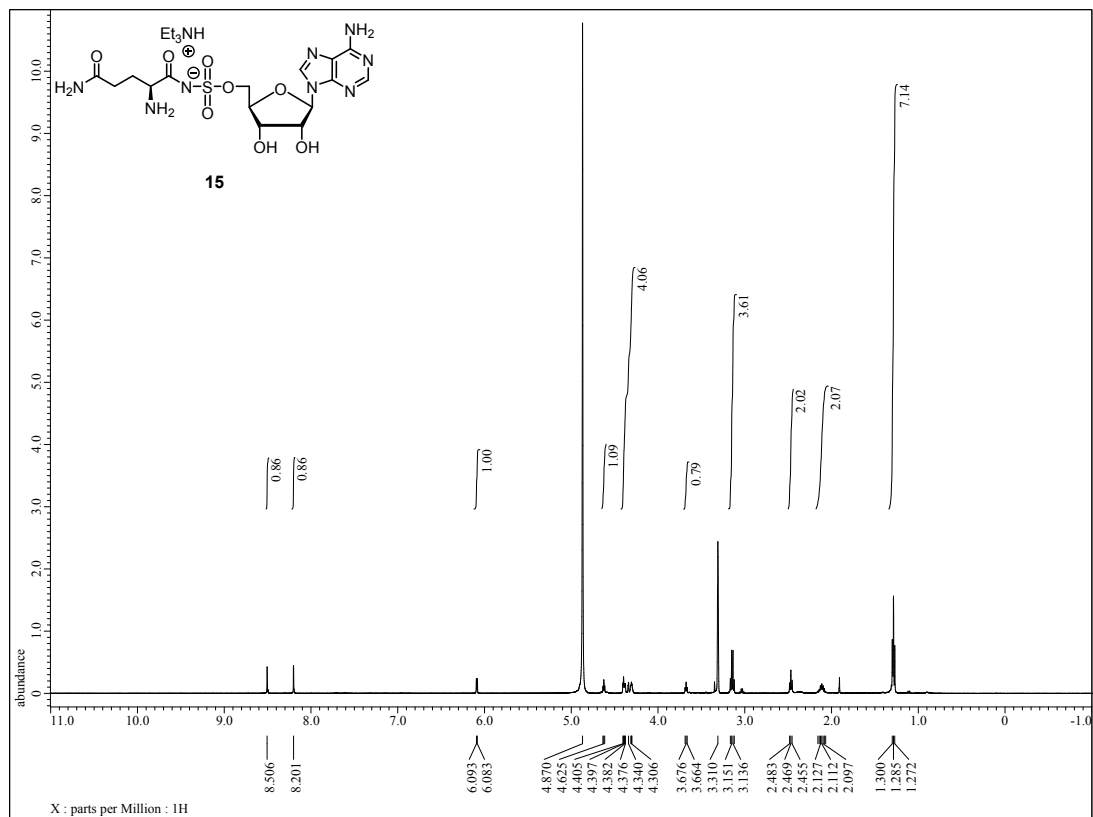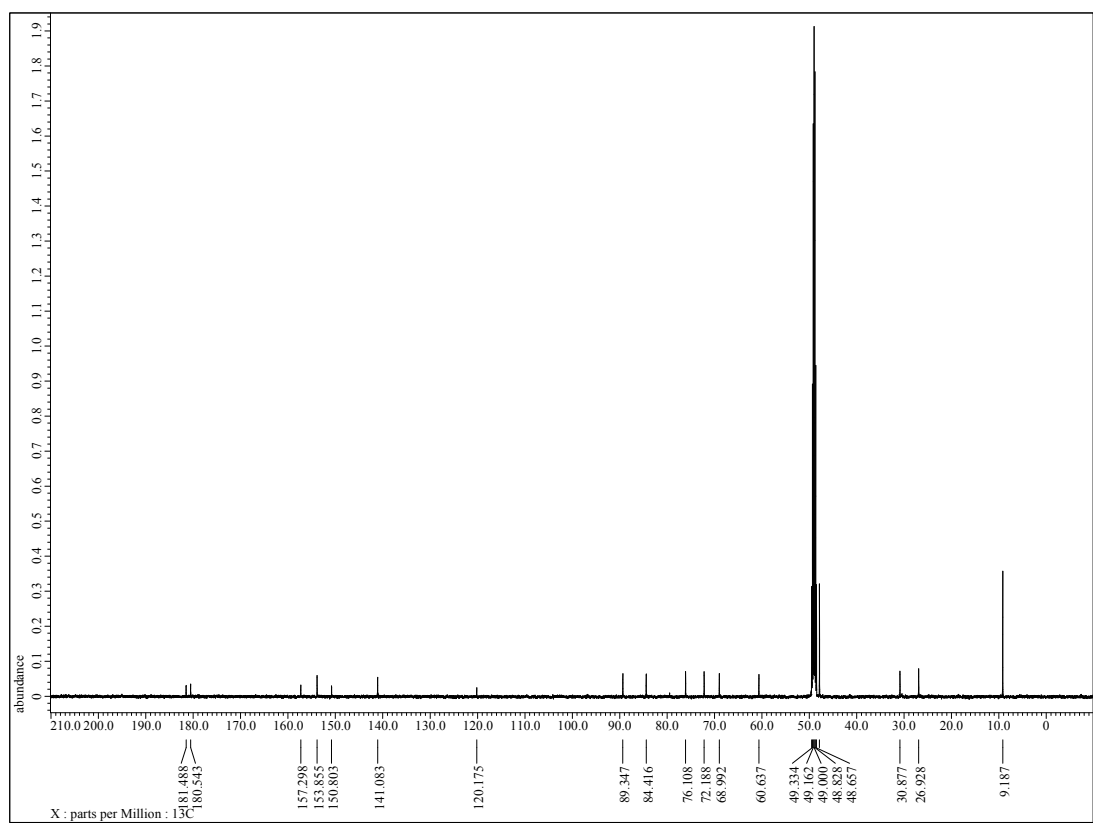

$^1\text{H}$ -NMR (500 MHz) and  $^{13}\text{C}$ -NMR (125 MHz) spectra of **S2f**

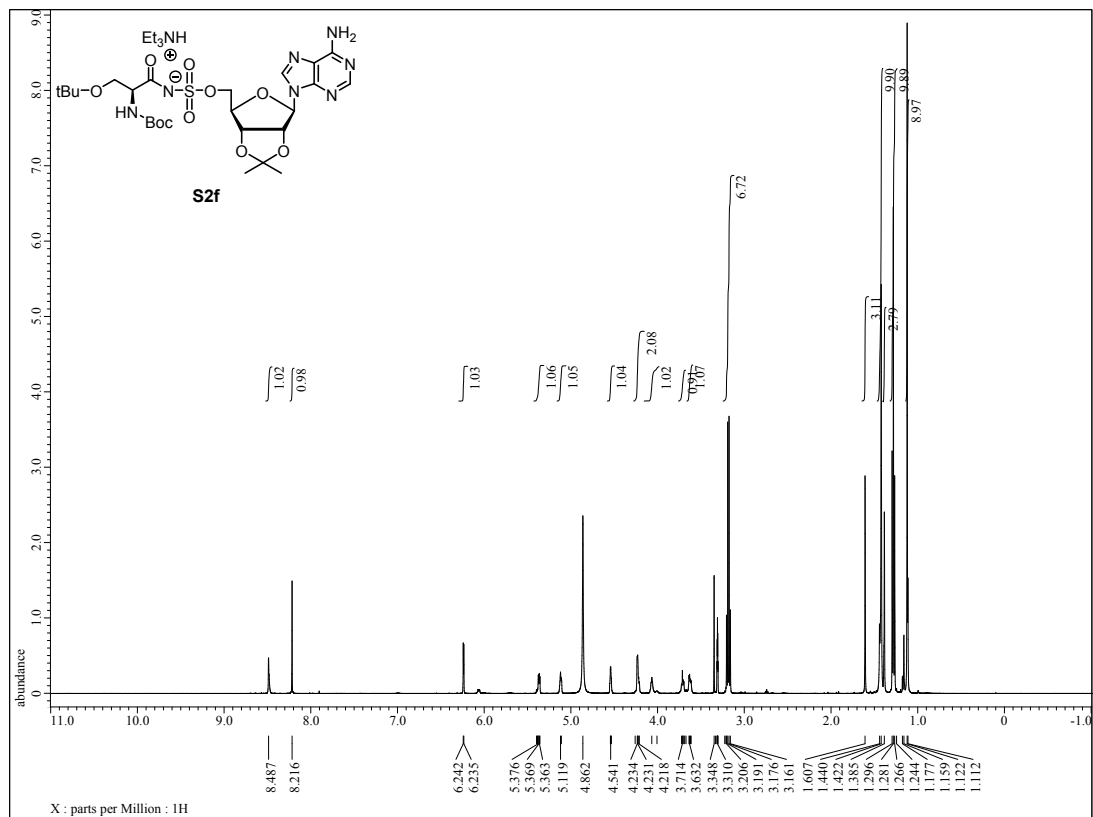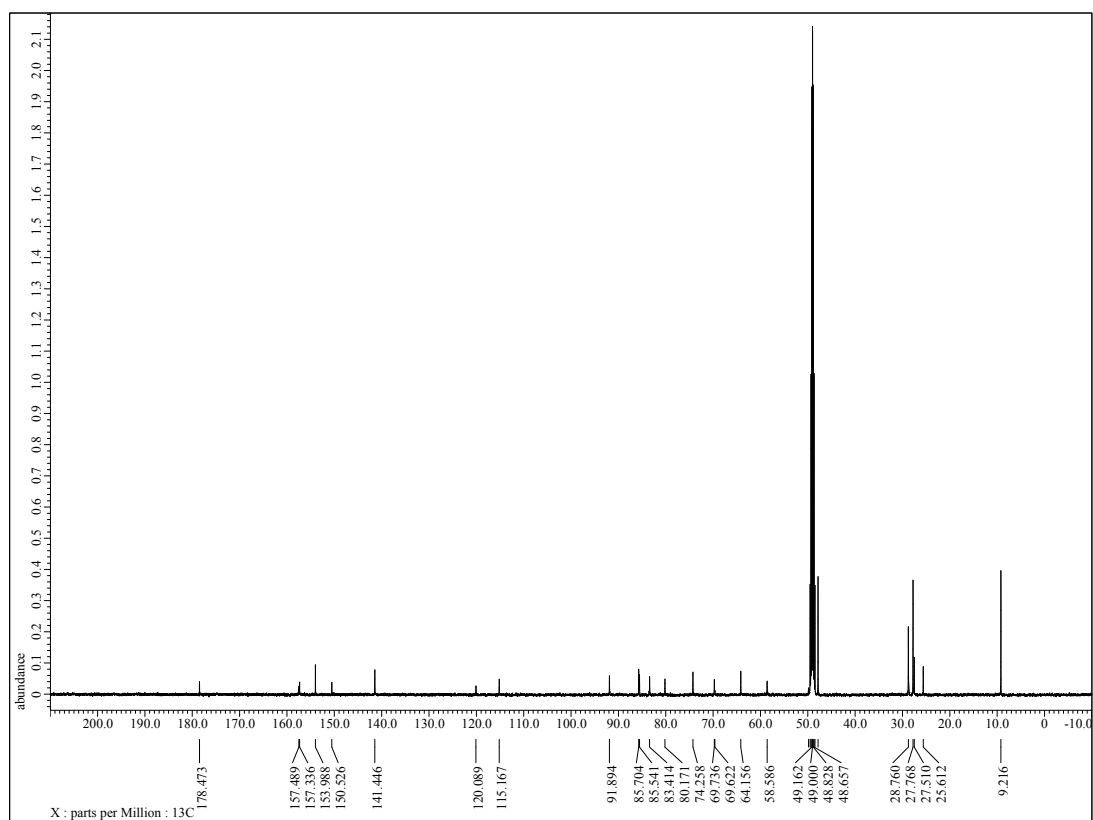

$^1\text{H}$ -NMR (500 MHz) and  $^{13}\text{C}$ -NMR (125 MHz) spectra of **16**

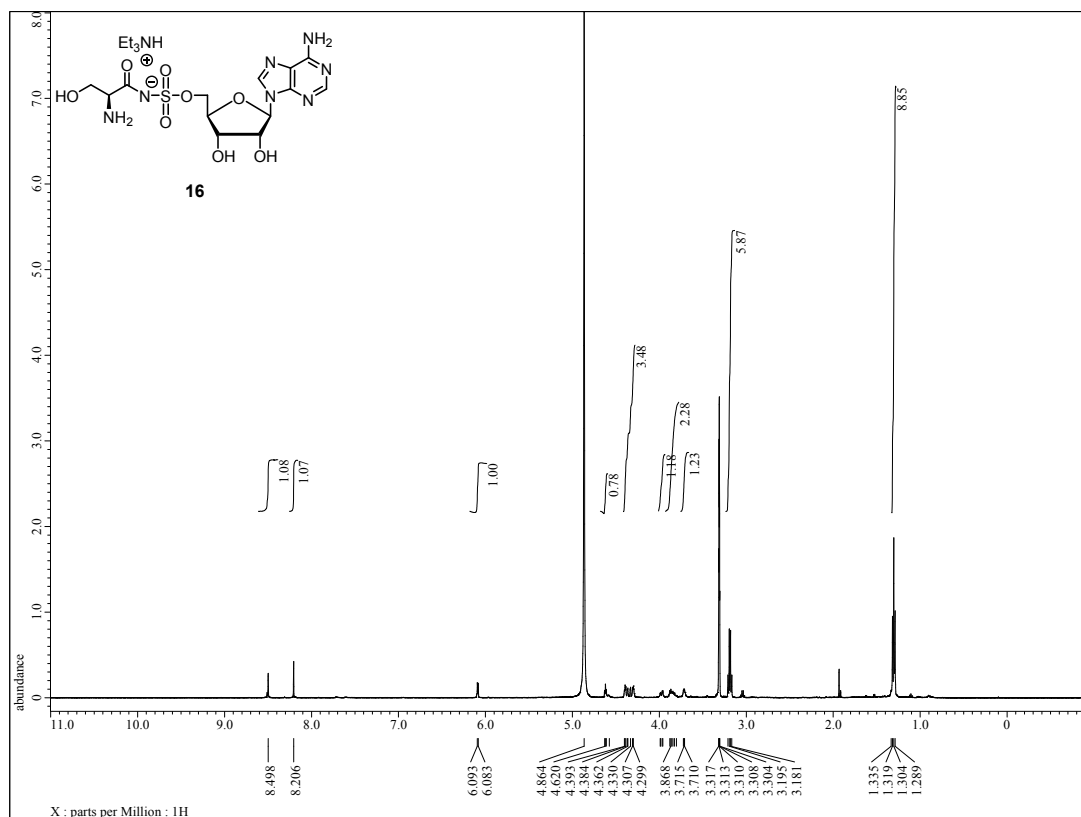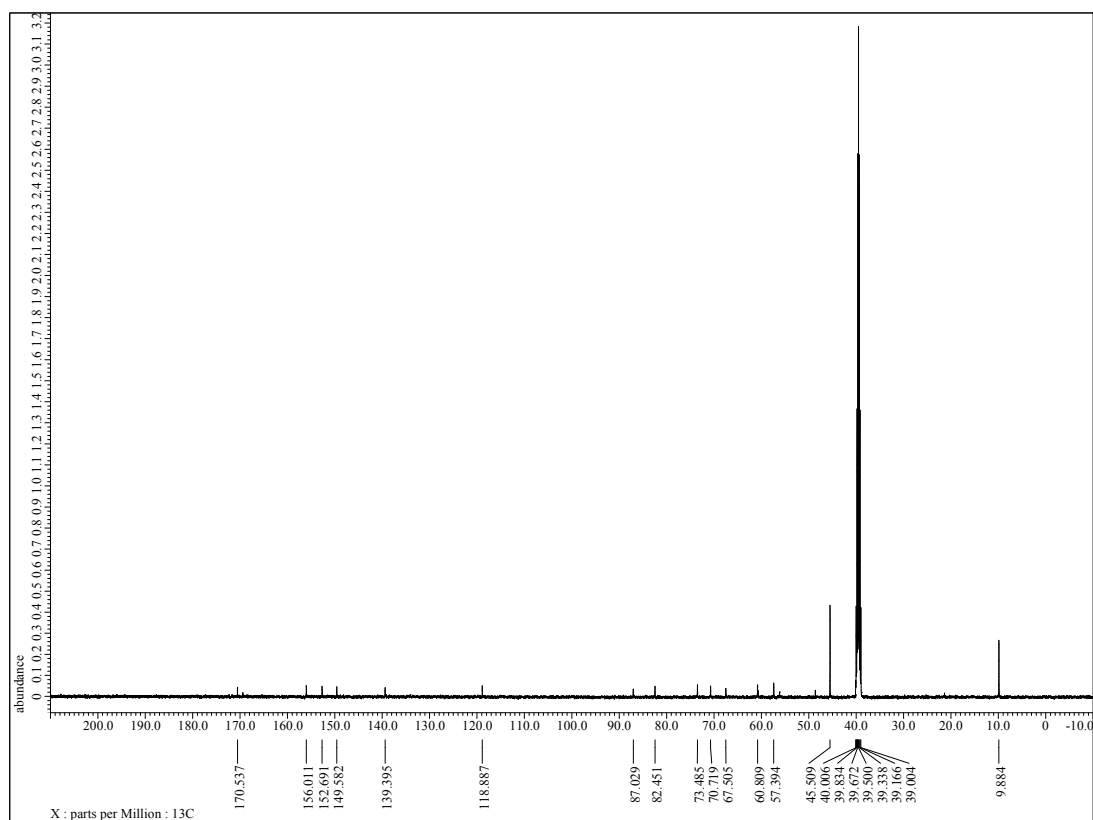

<sup>1</sup>H-NMR (500 MHz) and <sup>13</sup>C-NMR (125 MHz) spectra of **S2g**

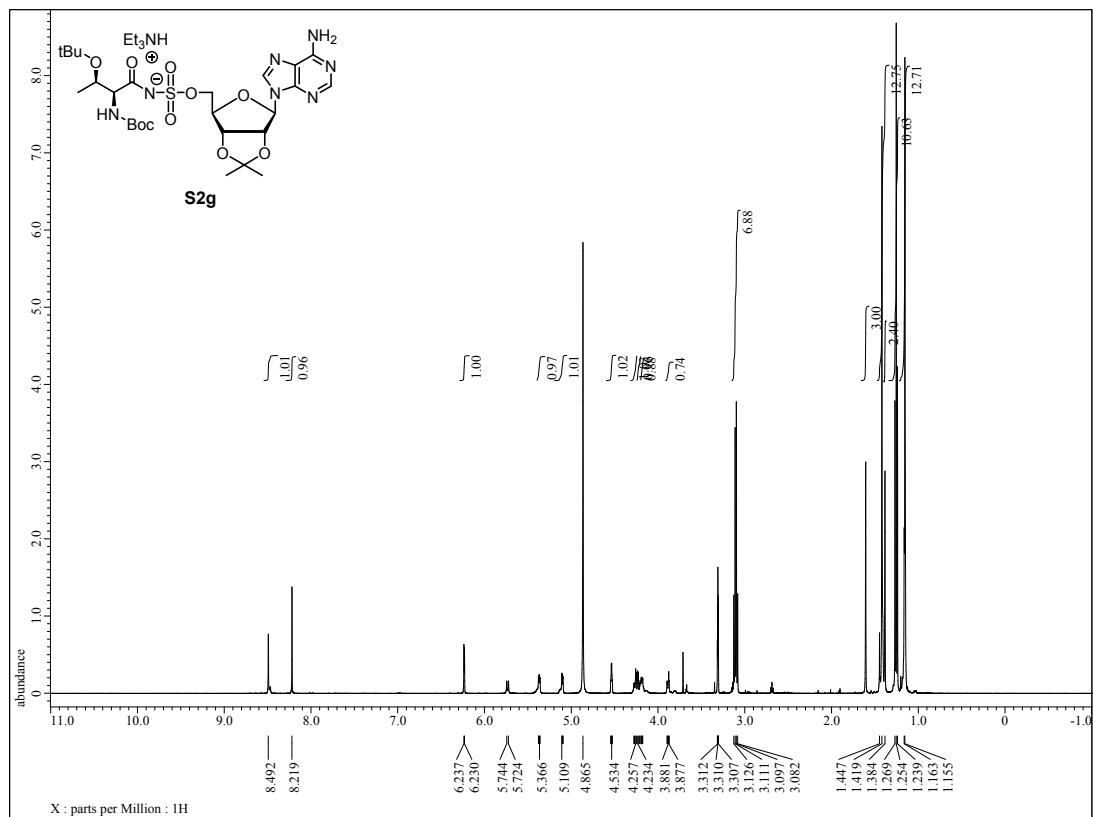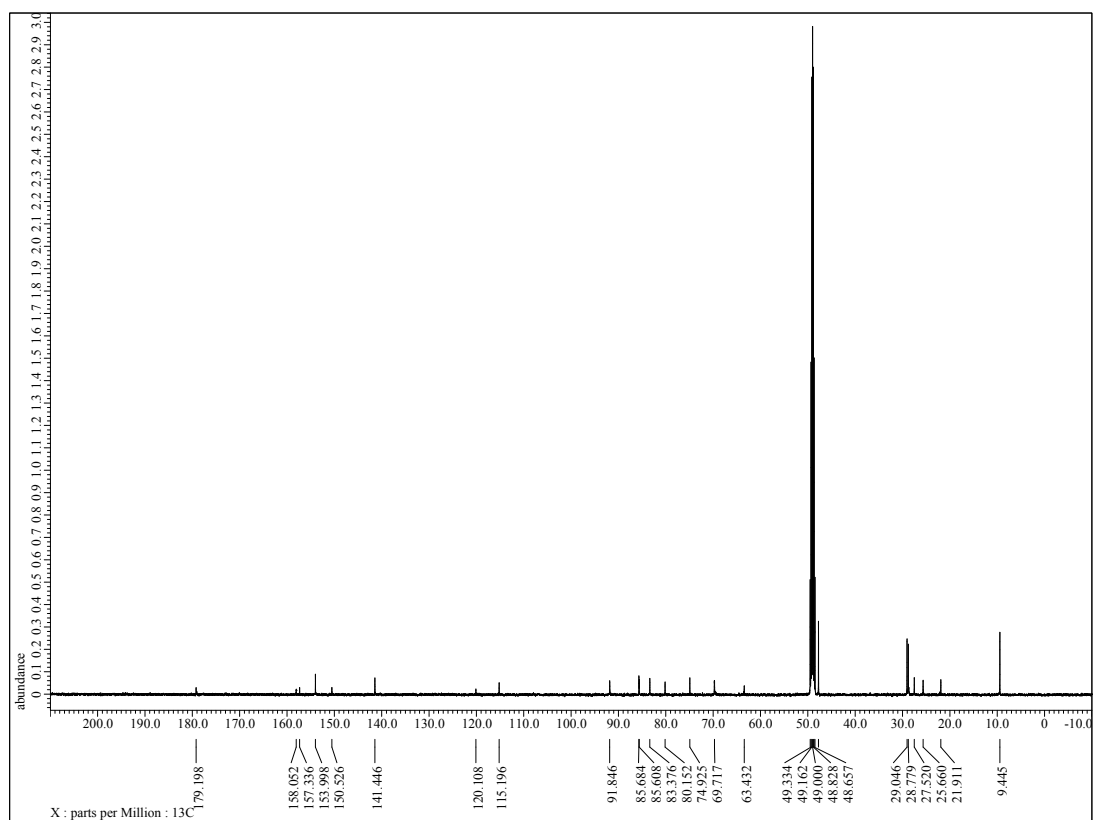

$^1\text{H}$ -NMR (500 MHz) and  $^{13}\text{C}$ -NMR (125 MHz) spectra of **17**

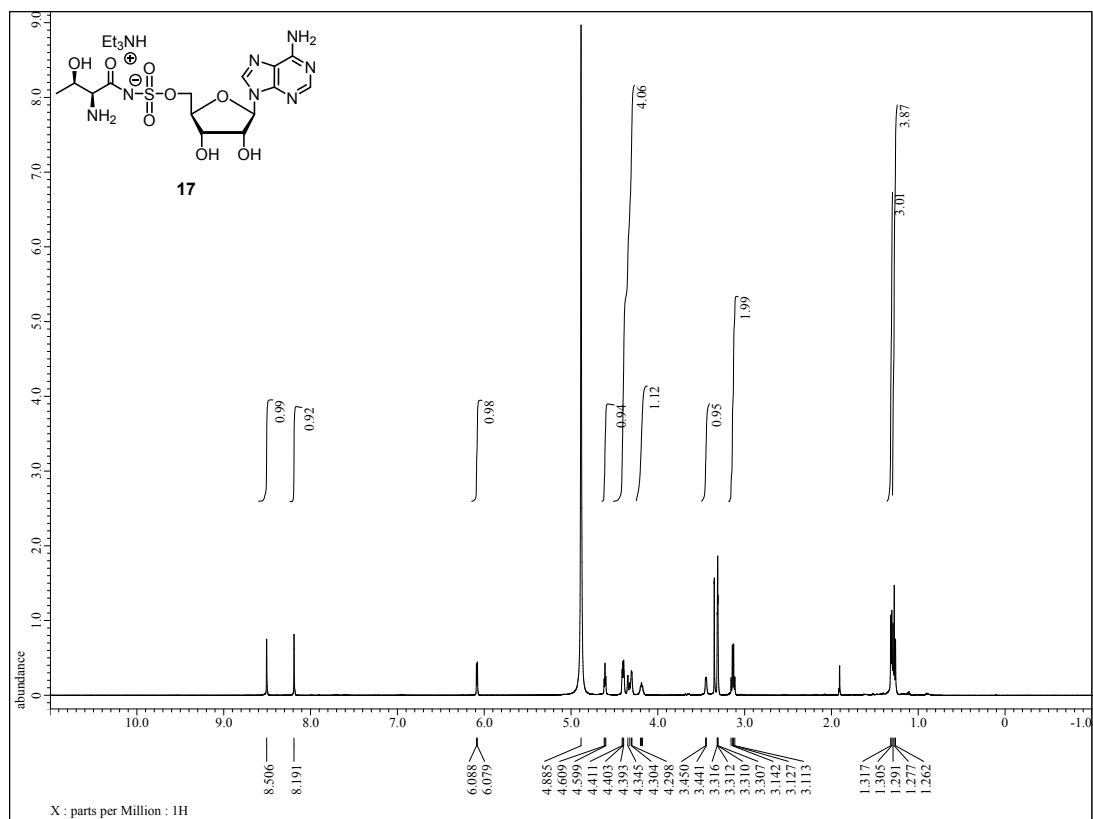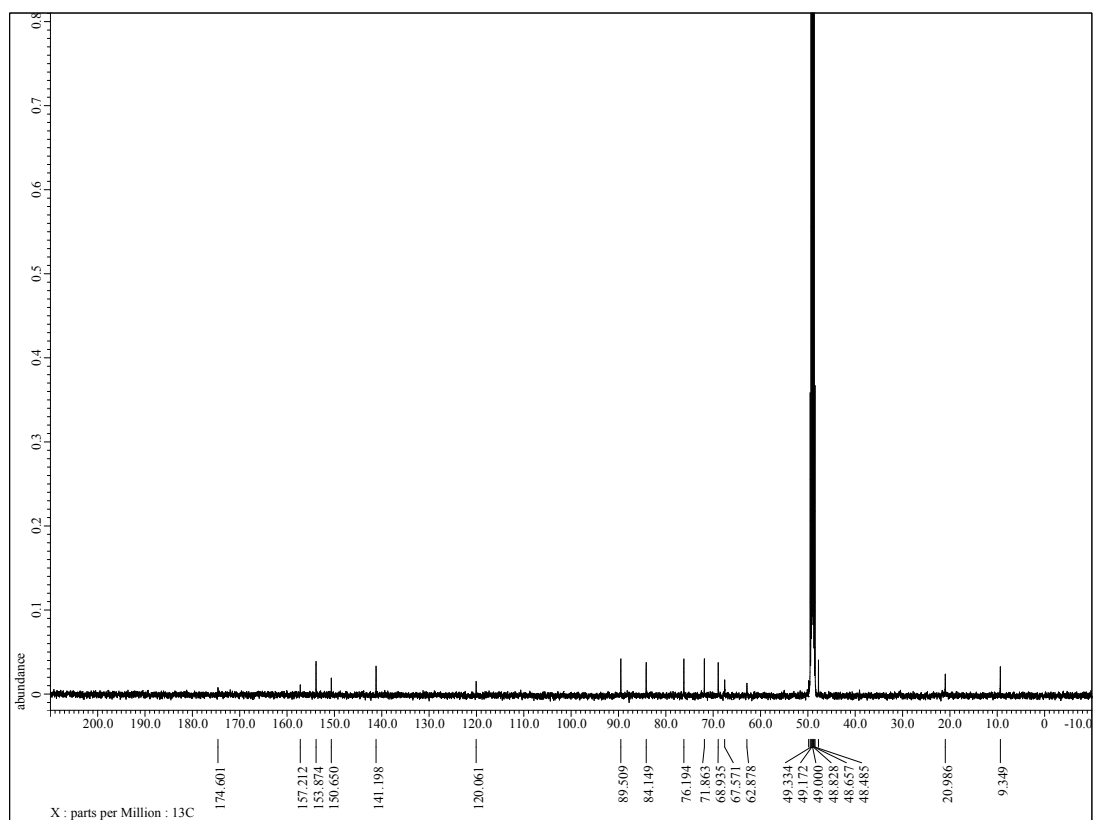

$^1\text{H}$ -NMR (500 MHz) and  $^{13}\text{C}$ -NMR (125 MHz) spectra of **S2h**

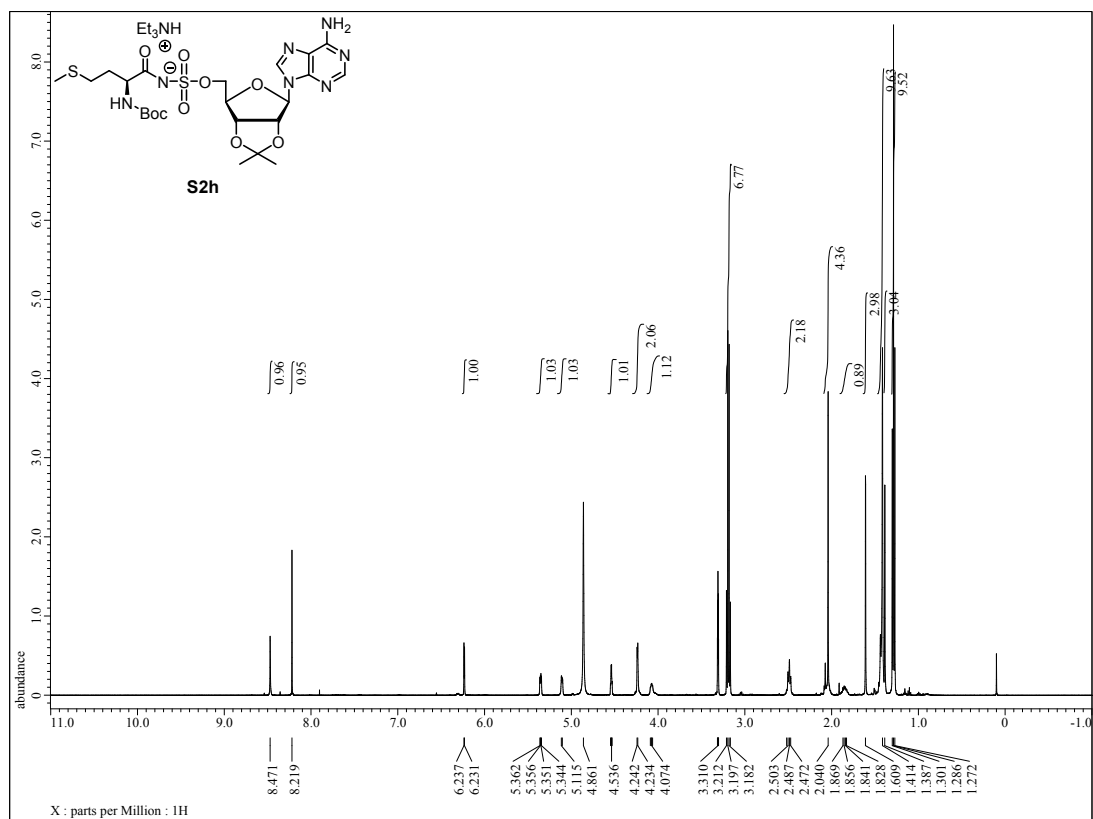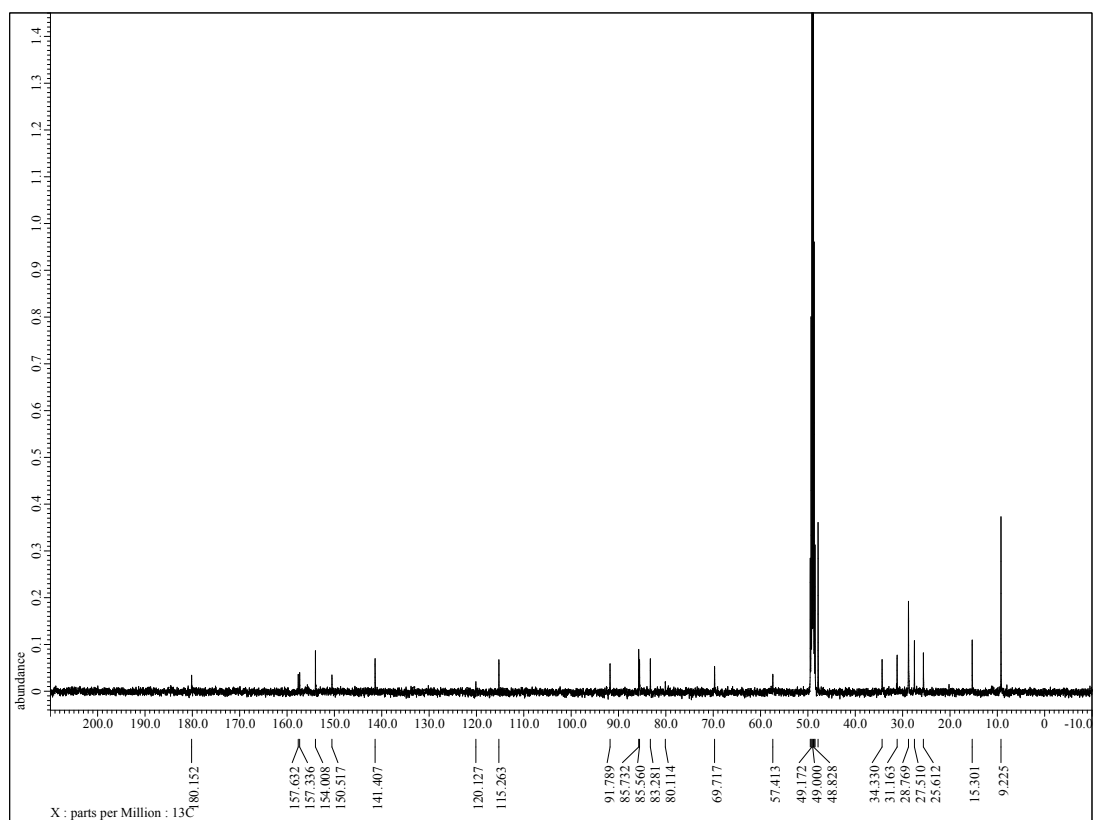

<sup>1</sup>H-NMR (500 MHz) and <sup>13</sup>C-NMR (125 MHz) spectra of **18**

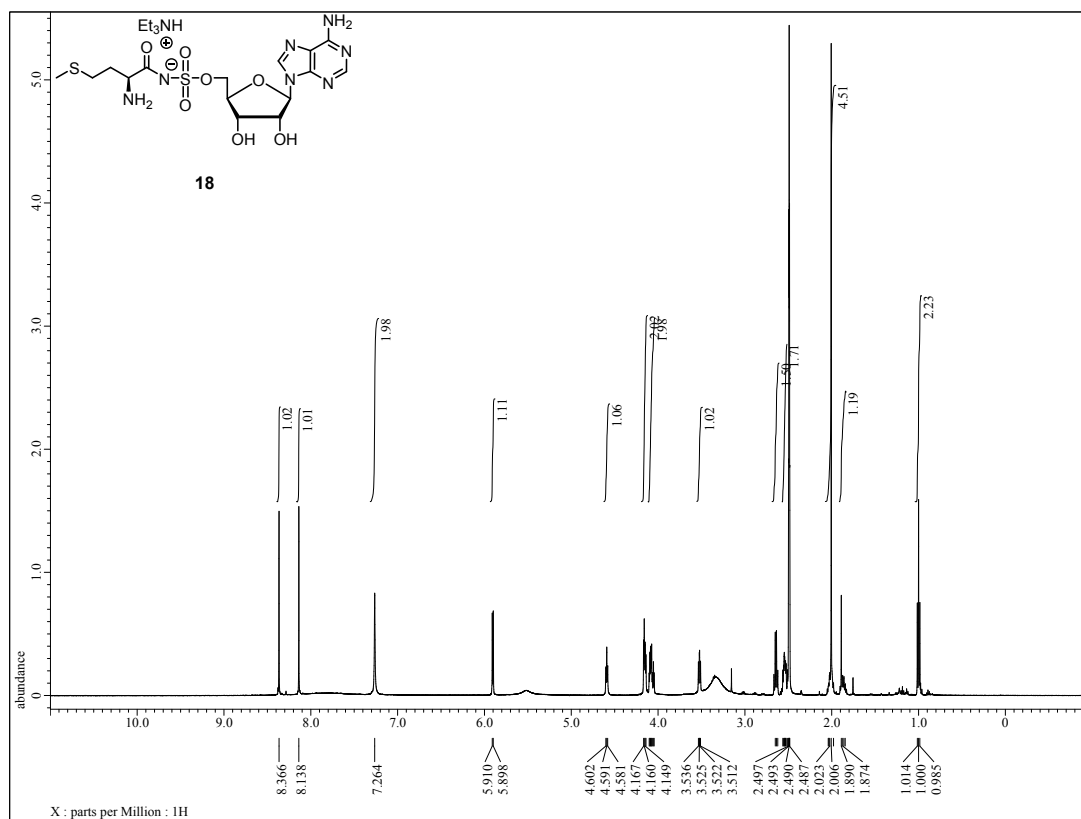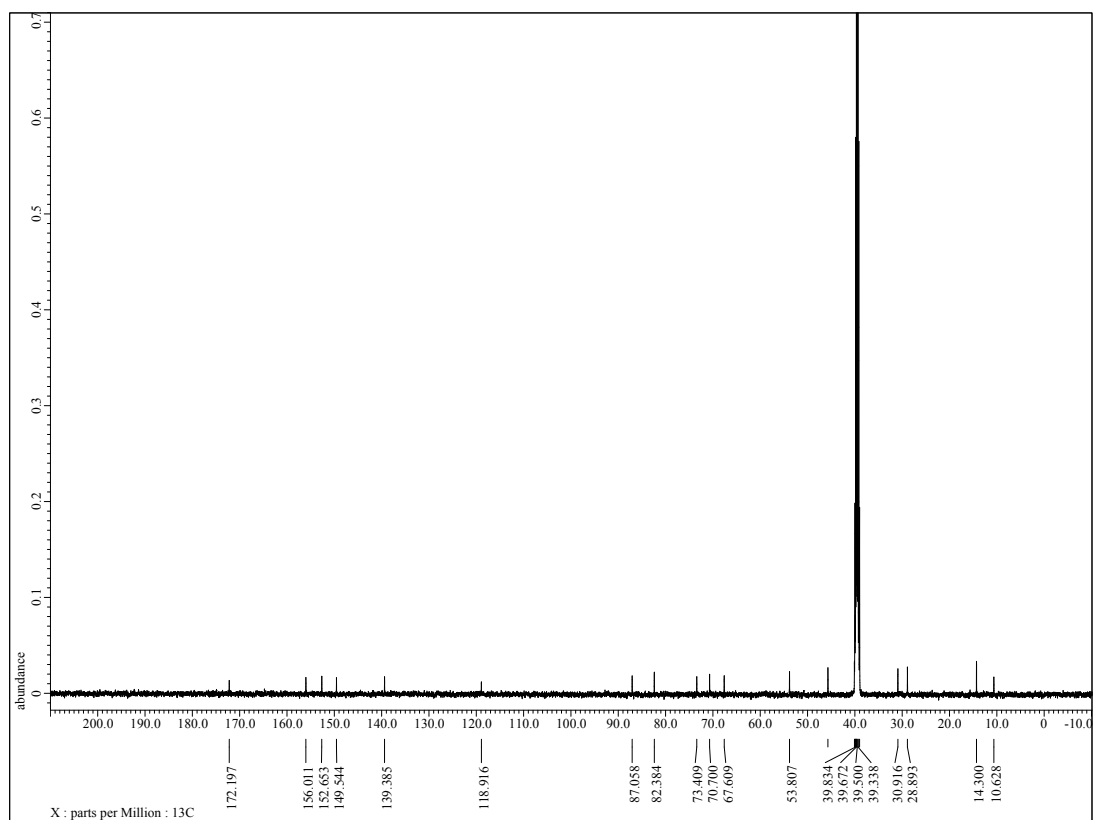

$^1\text{H}$ -NMR (500 MHz) and  $^{13}\text{C}$ -NMR (125 MHz) spectra of **S2i** in  $\text{CD}_3\text{OD}$

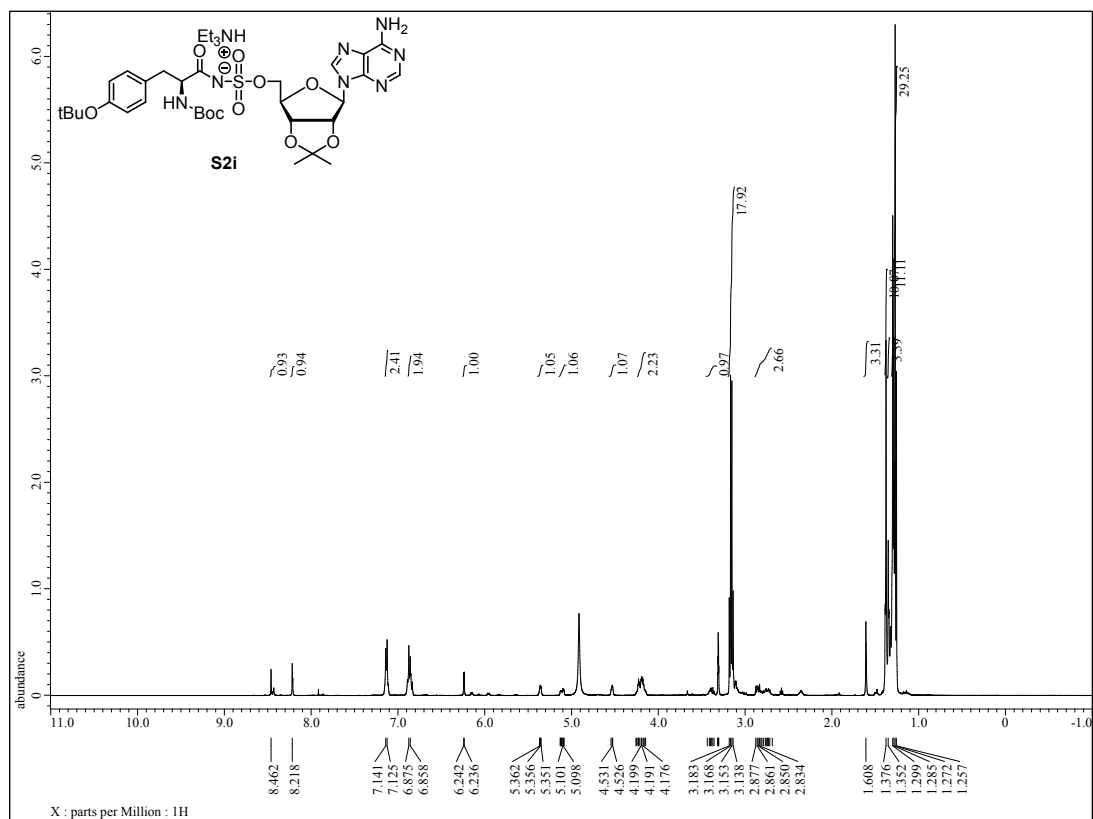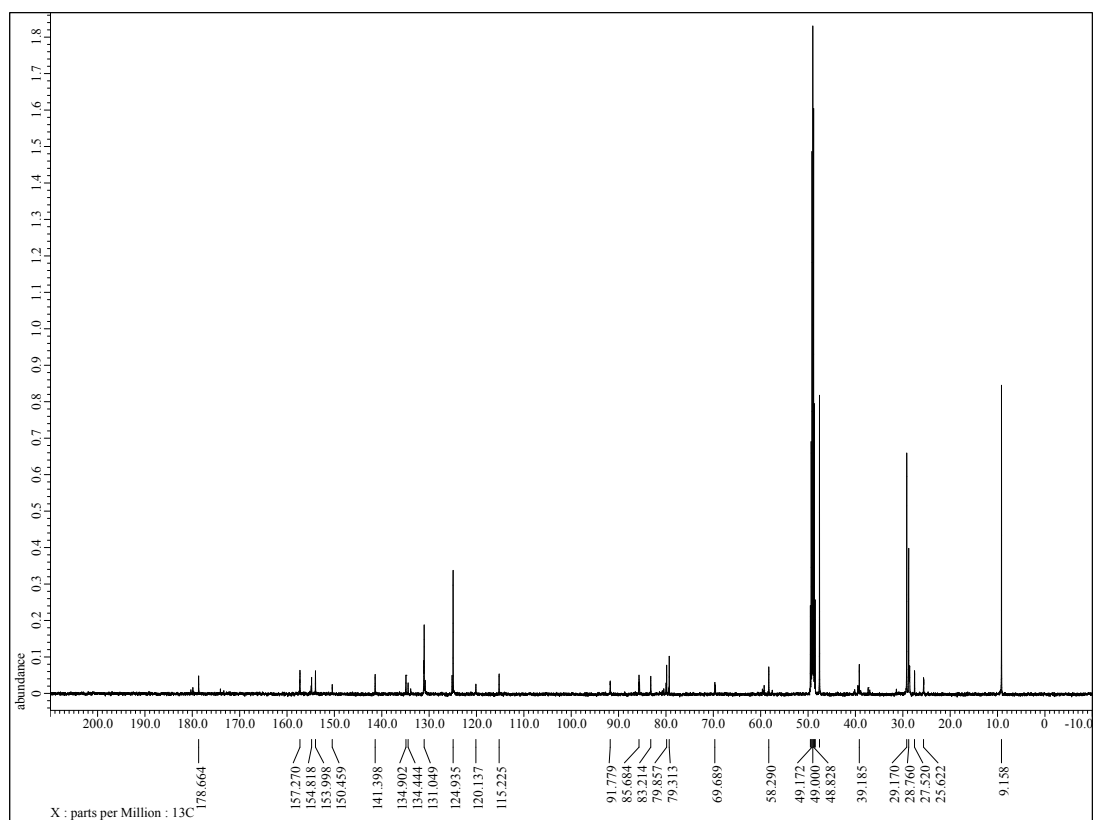

$^1\text{H}$ -NMR (500 MHz) spectrum of **19** in  $\text{CD}_3\text{OD}$

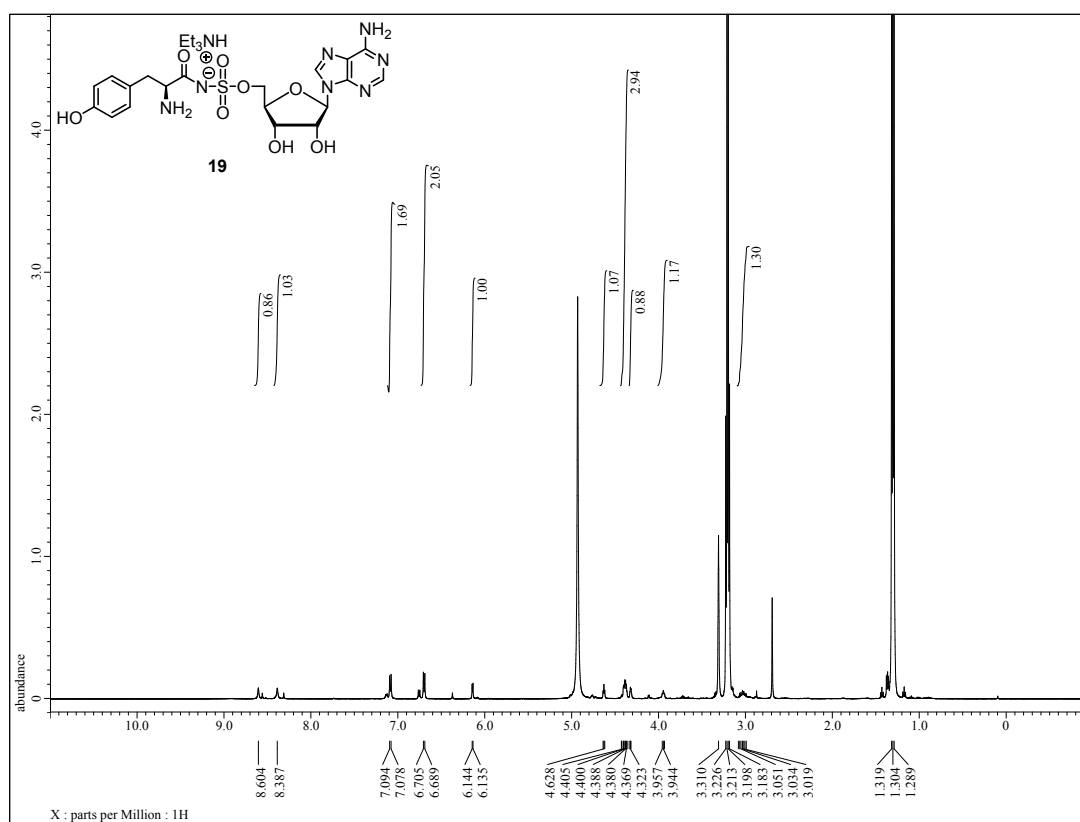

$^1\text{H}$ -NMR (500 MHz) and  $^{13}\text{C}$ -NMR (125 MHz) spectra of **S2j**

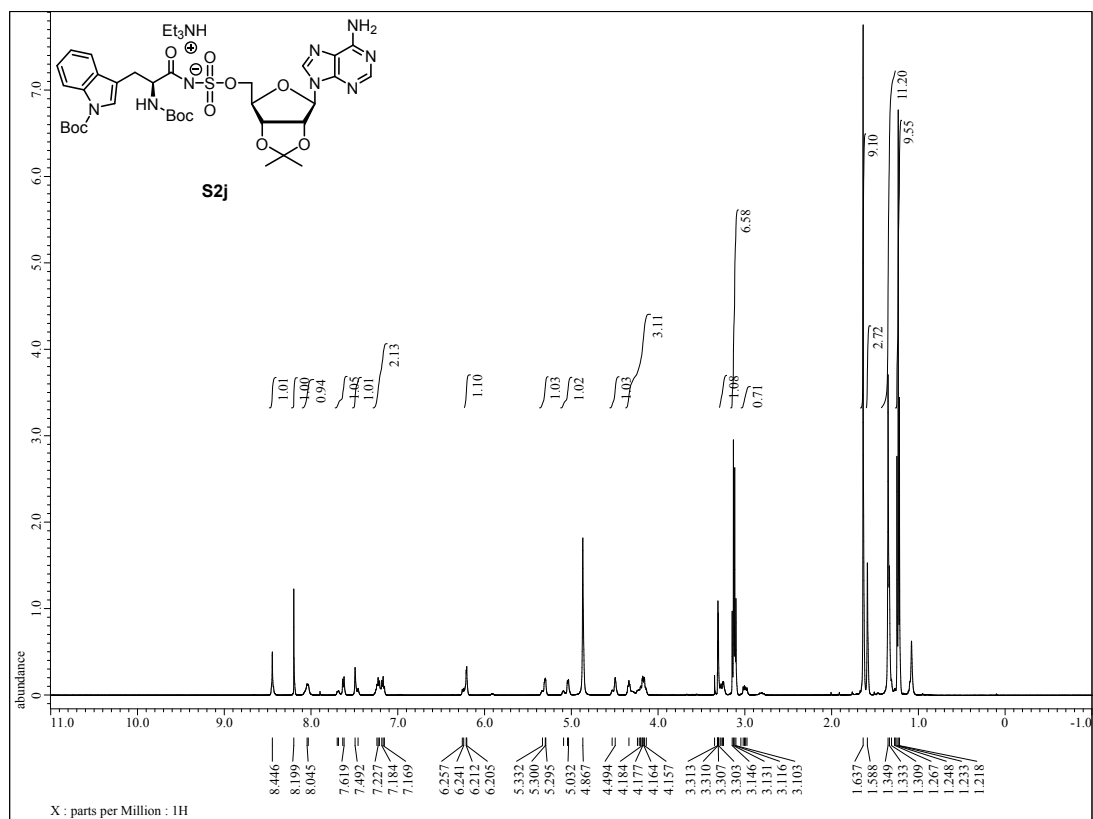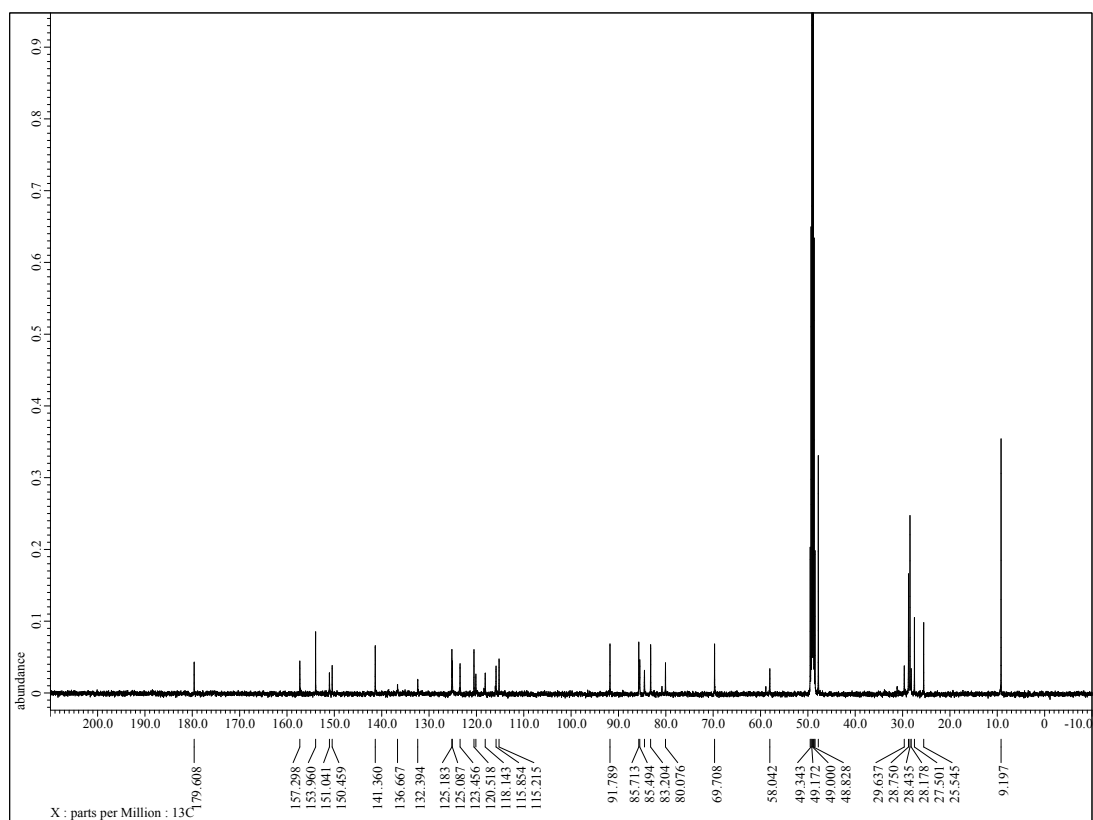

$^1\text{H}$ -NMR (500 MHz) and  $^{13}\text{C}$ -NMR (125 MHz) spectra of **20**

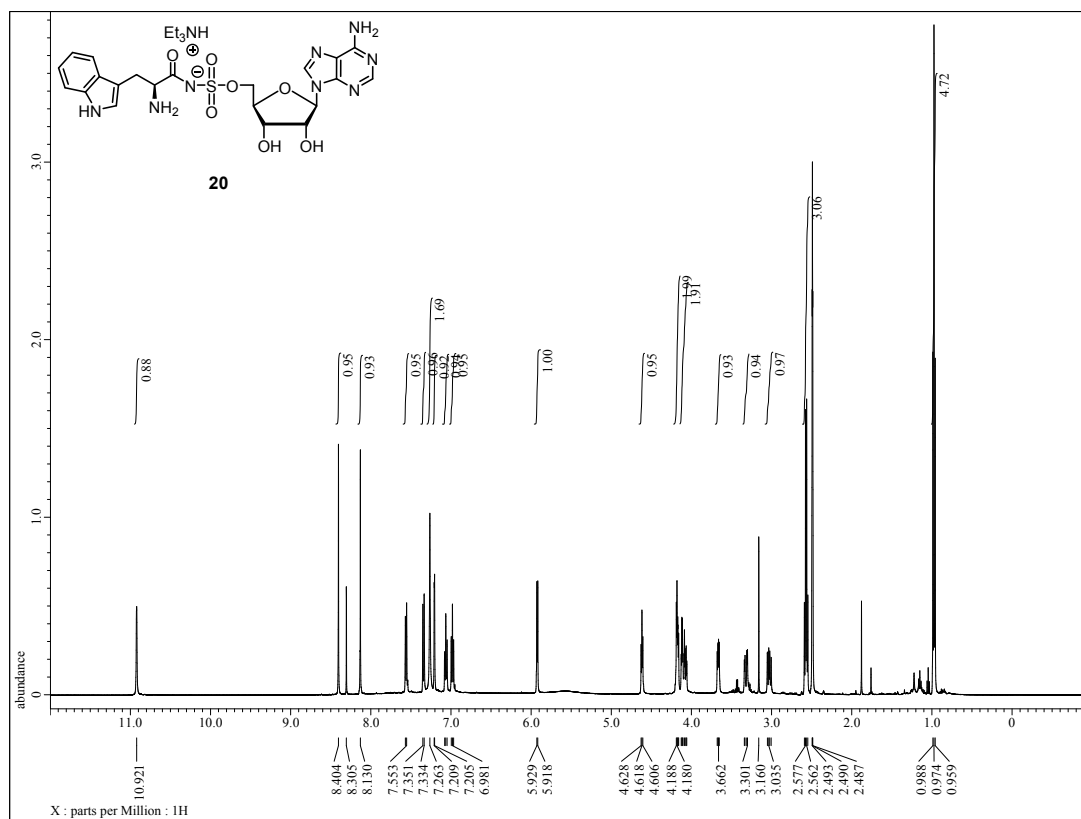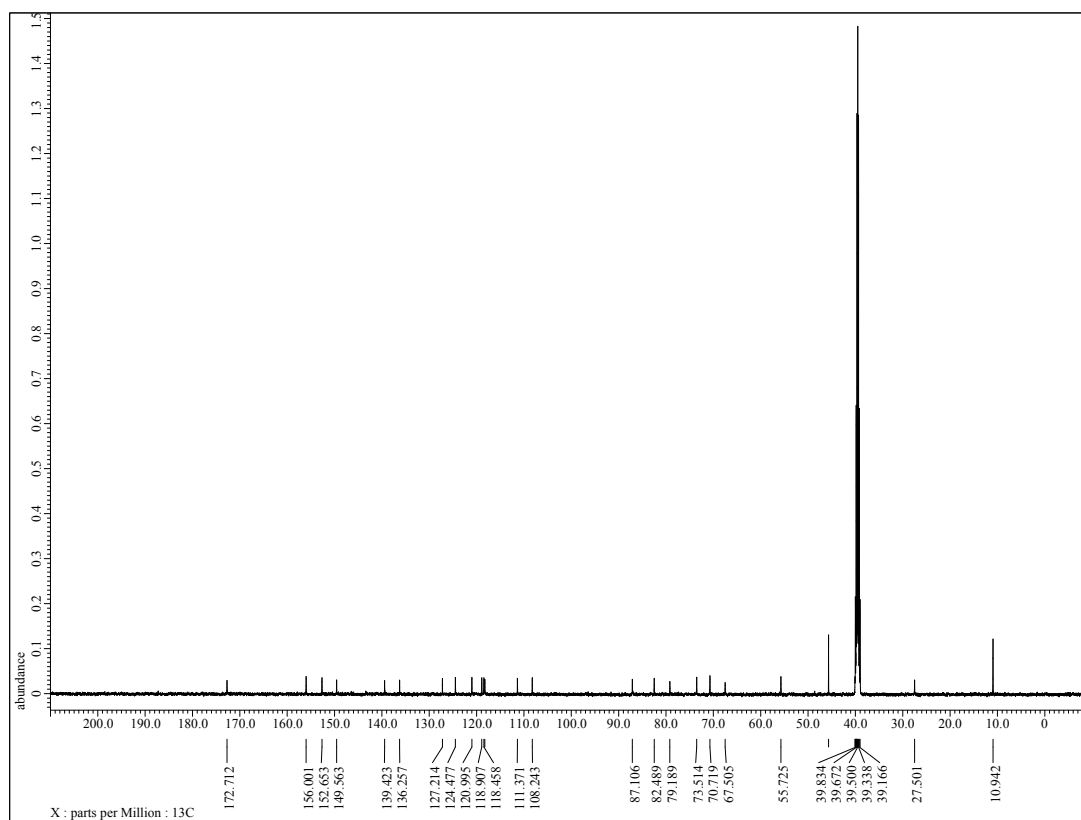

$^1\text{H}$ -NMR (500 MHz) and  $^{13}\text{C}$ -NMR (125 MHz) spectra of **S2k**

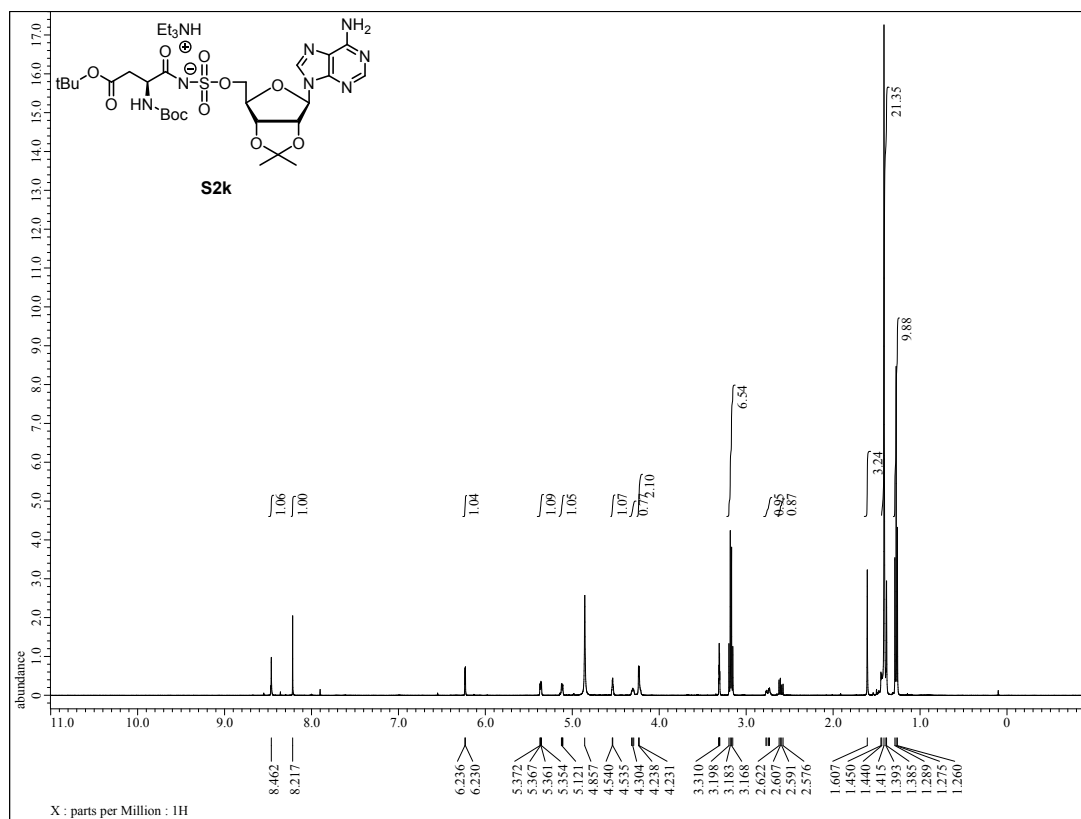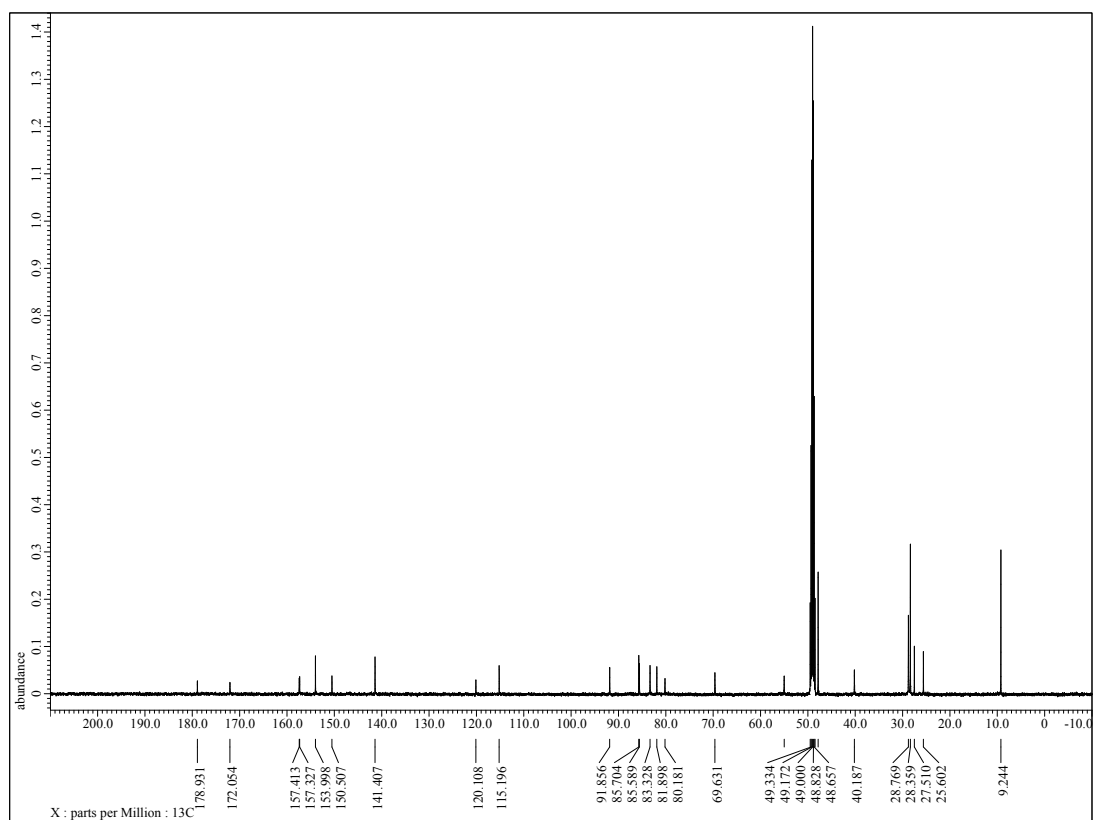

$^1\text{H}$ -NMR (500 MHz) and  $^{13}\text{C}$ -NMR (125 MHz) spectra of **21**

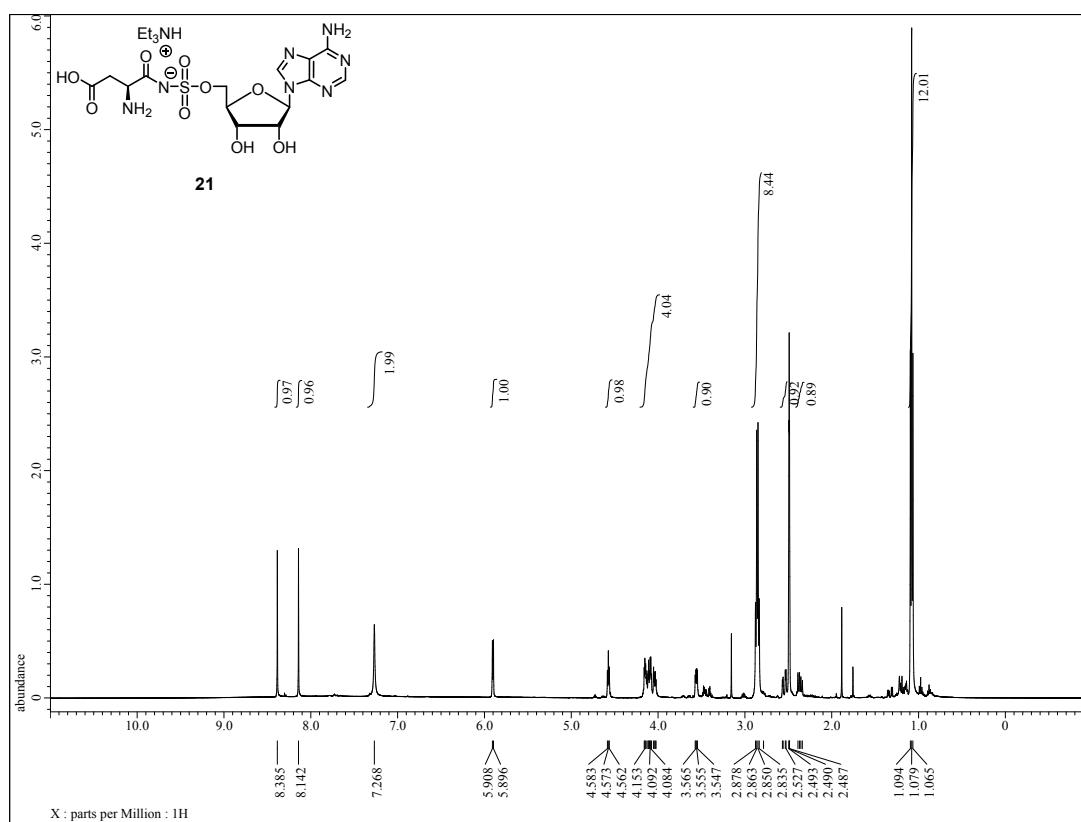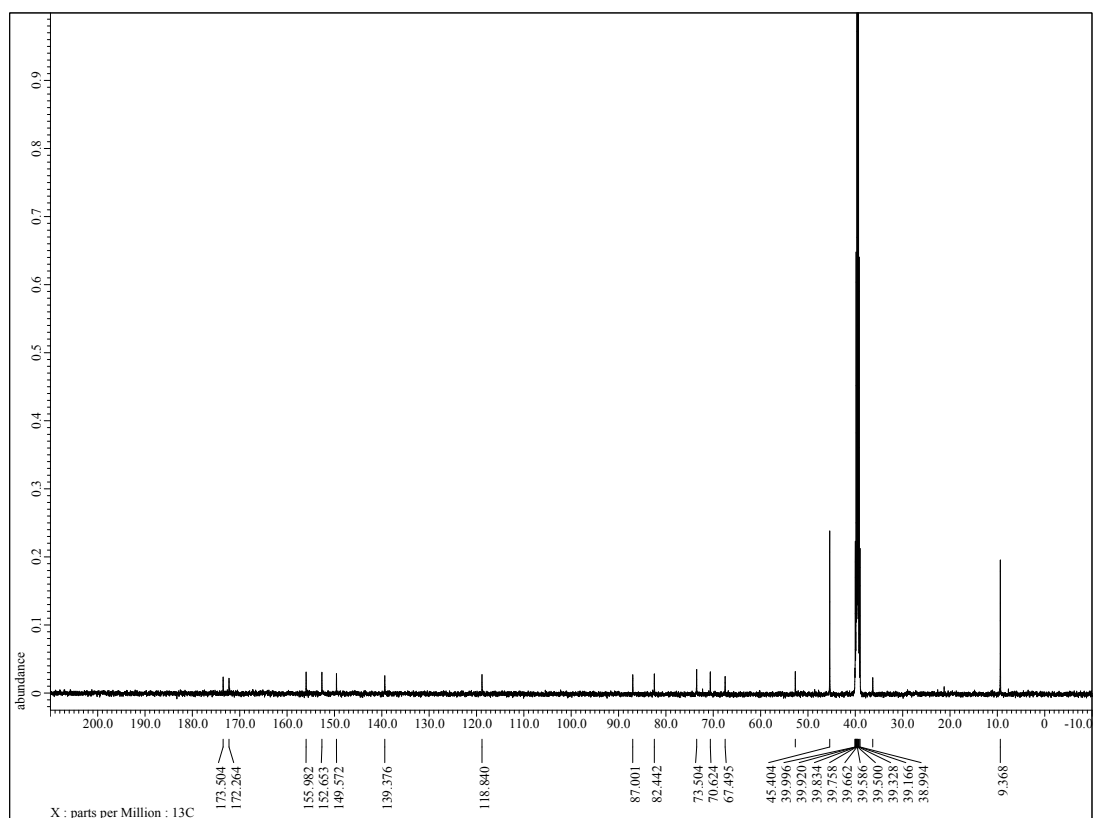

$^1\text{H}$ -NMR (500 MHz) and  $^{13}\text{C}$ -NMR (125 MHz) spectra of **S21**

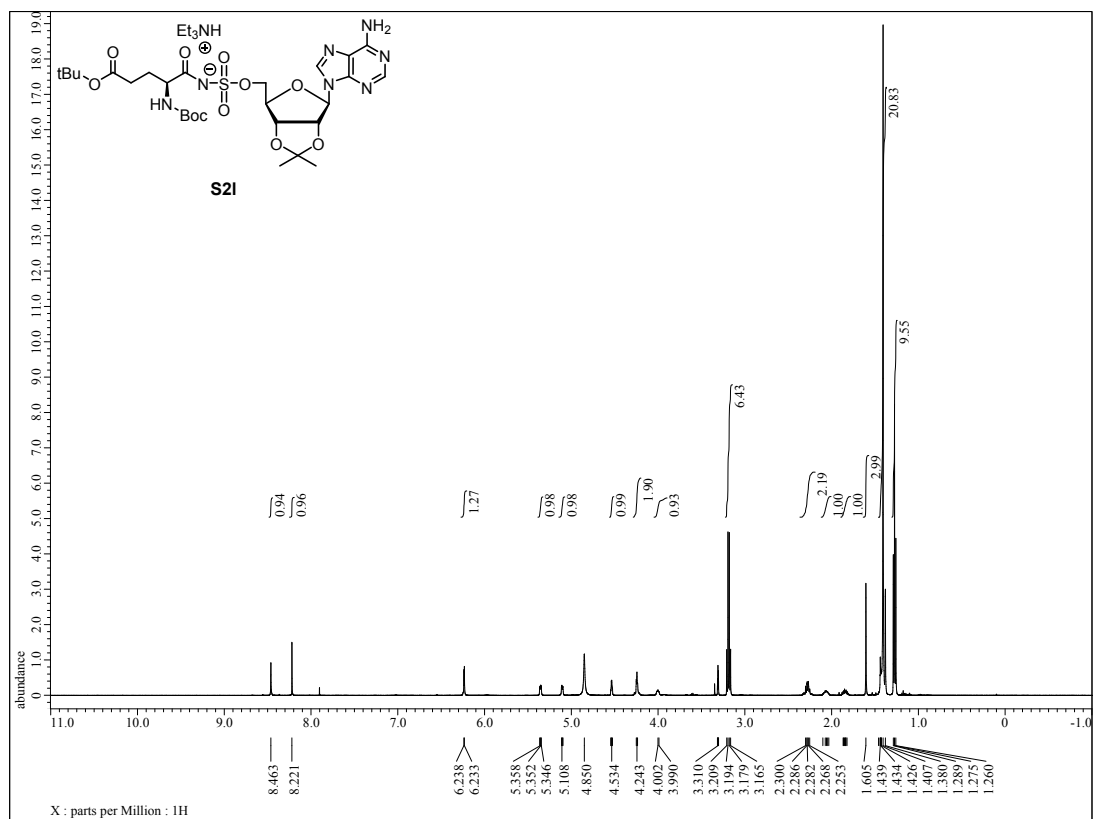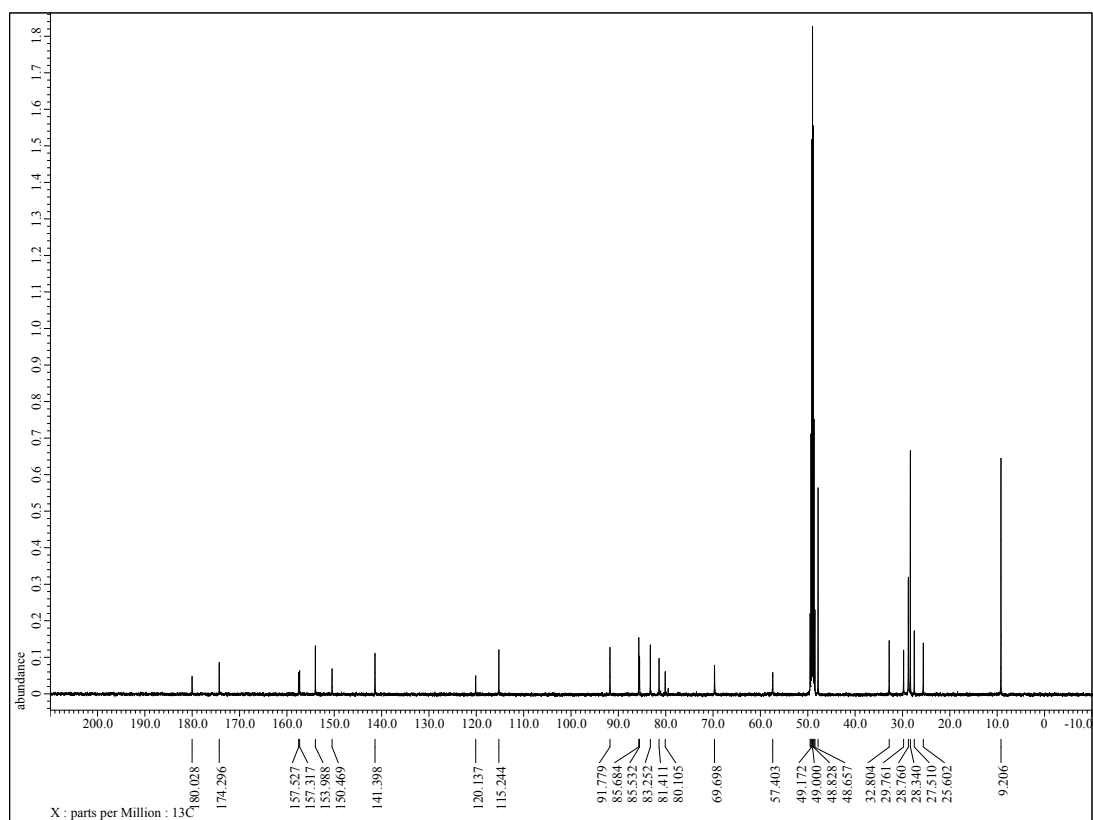

$^1\text{H}$ -NMR (500 MHz) and  $^{13}\text{C}$ -NMR (125 MHz) spectra of **22**

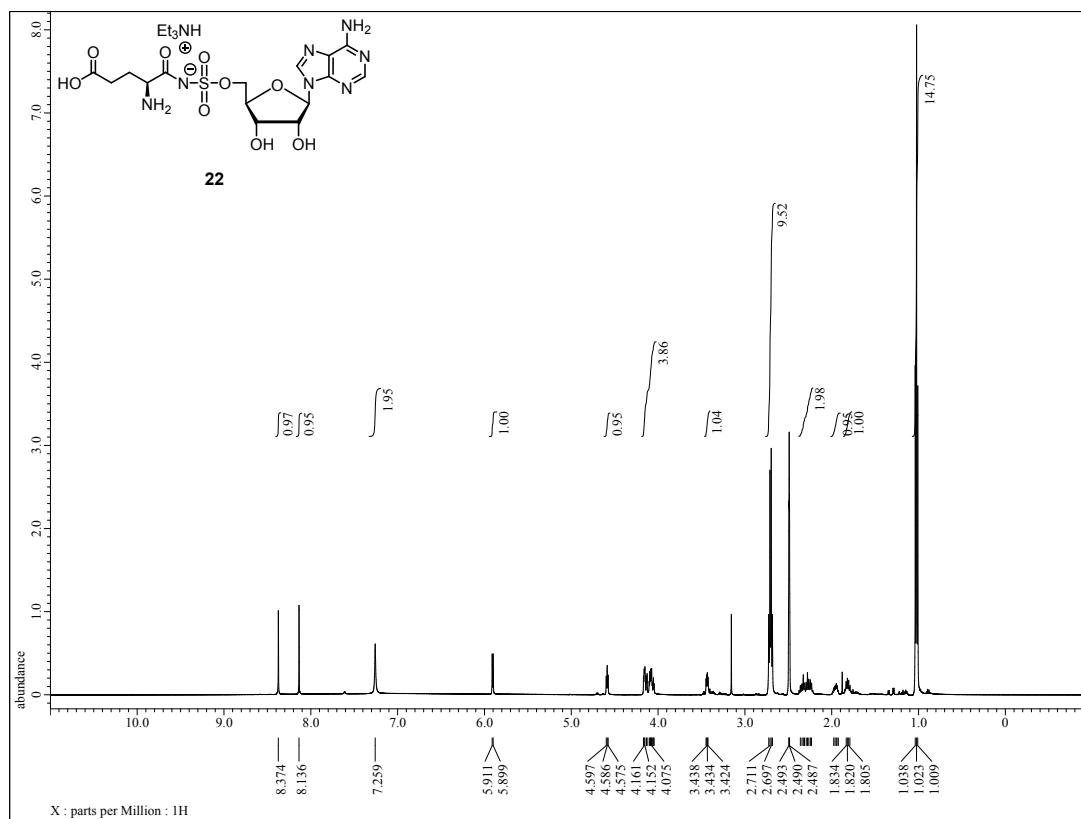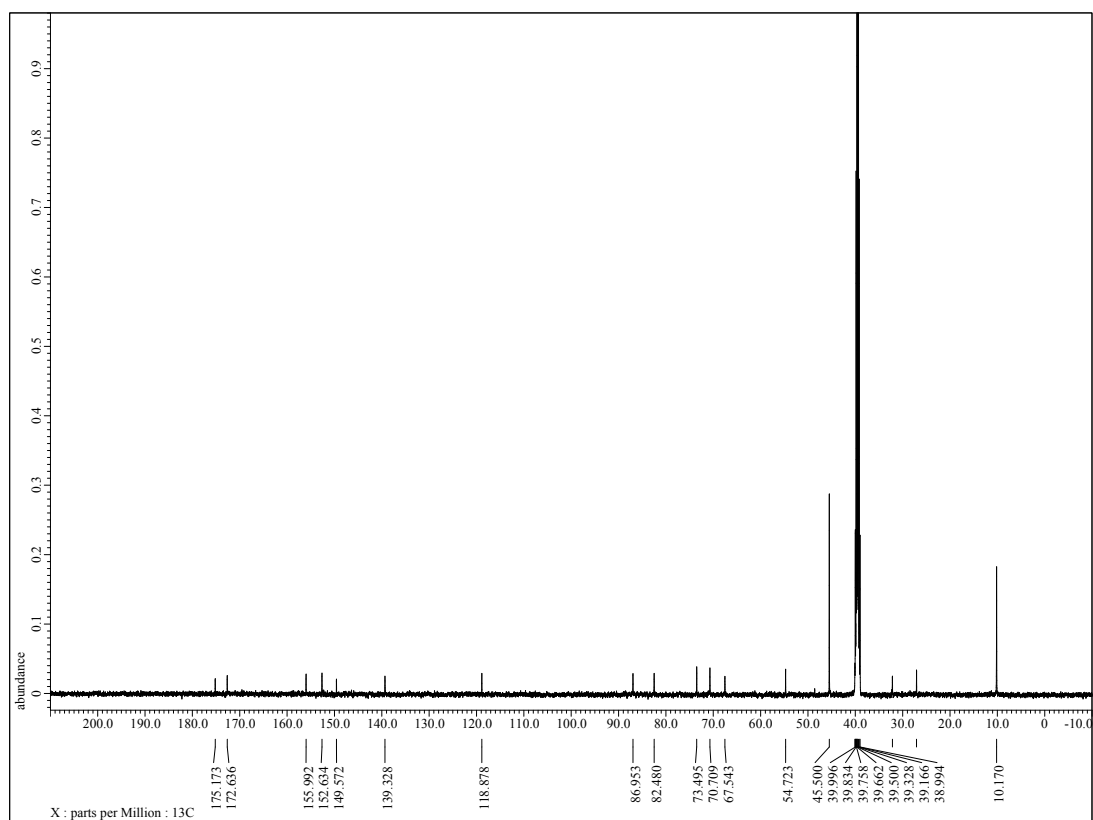

$^1\text{H}$ -NMR (500 MHz) and  $^{13}\text{C}$ -NMR (125 MHz) spectra of **S2m**

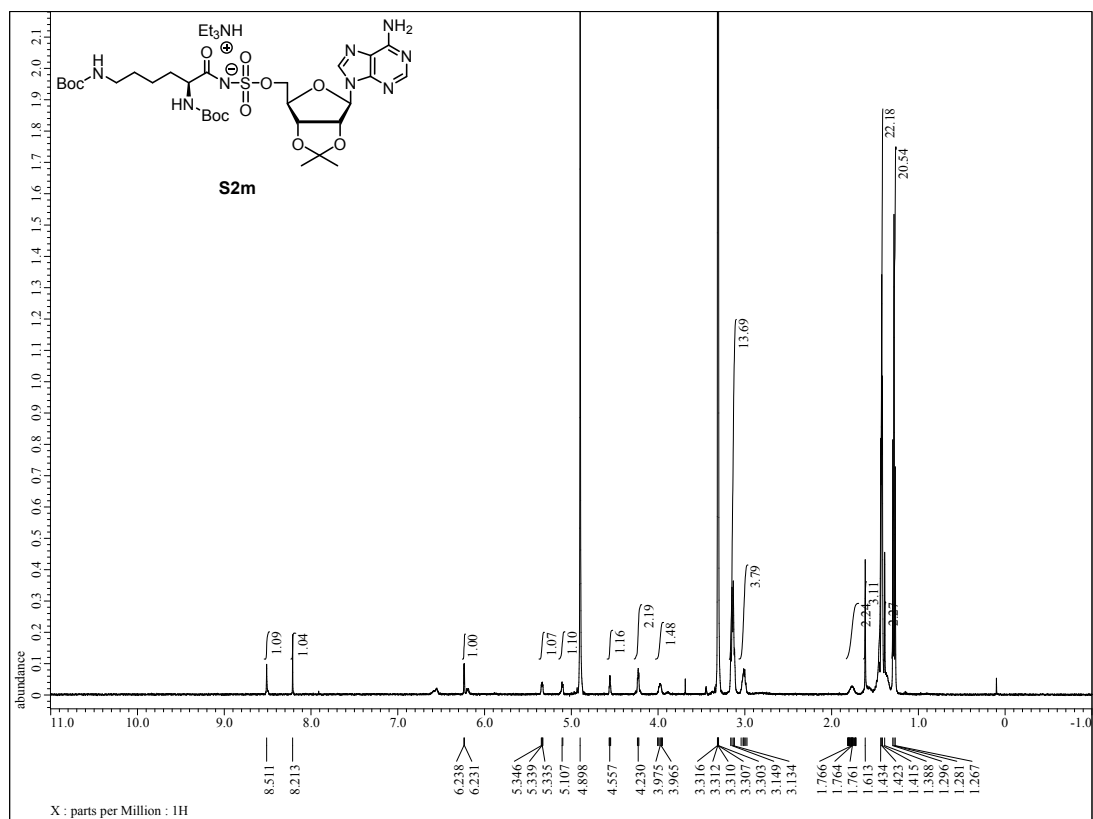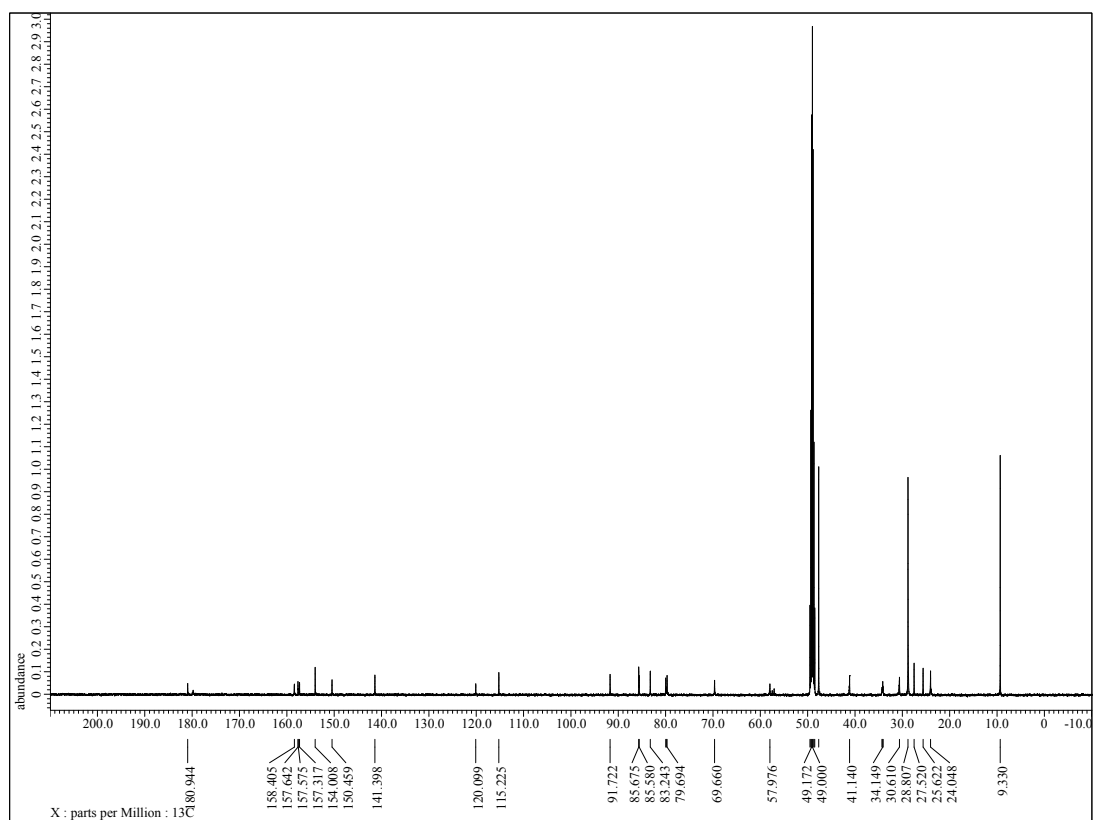

$^1\text{H}$ -NMR (500 MHz) and  $^{13}\text{C}$ -NMR (125 MHz) spectra of **23**

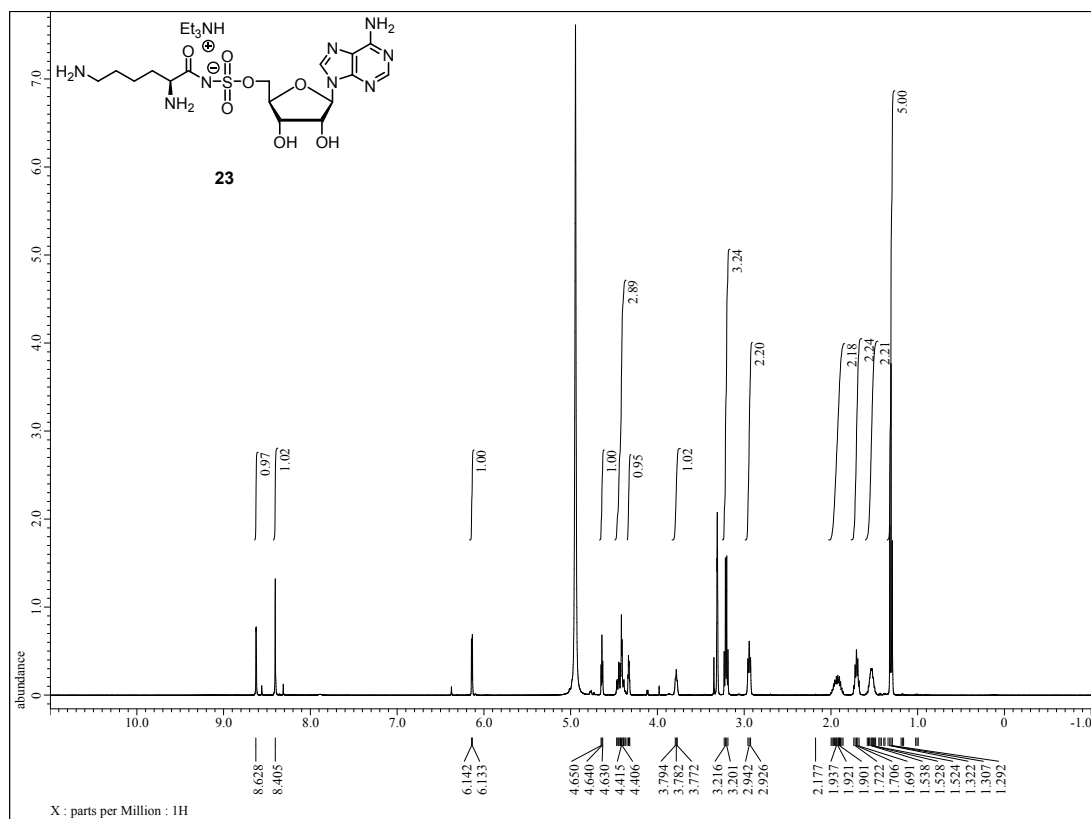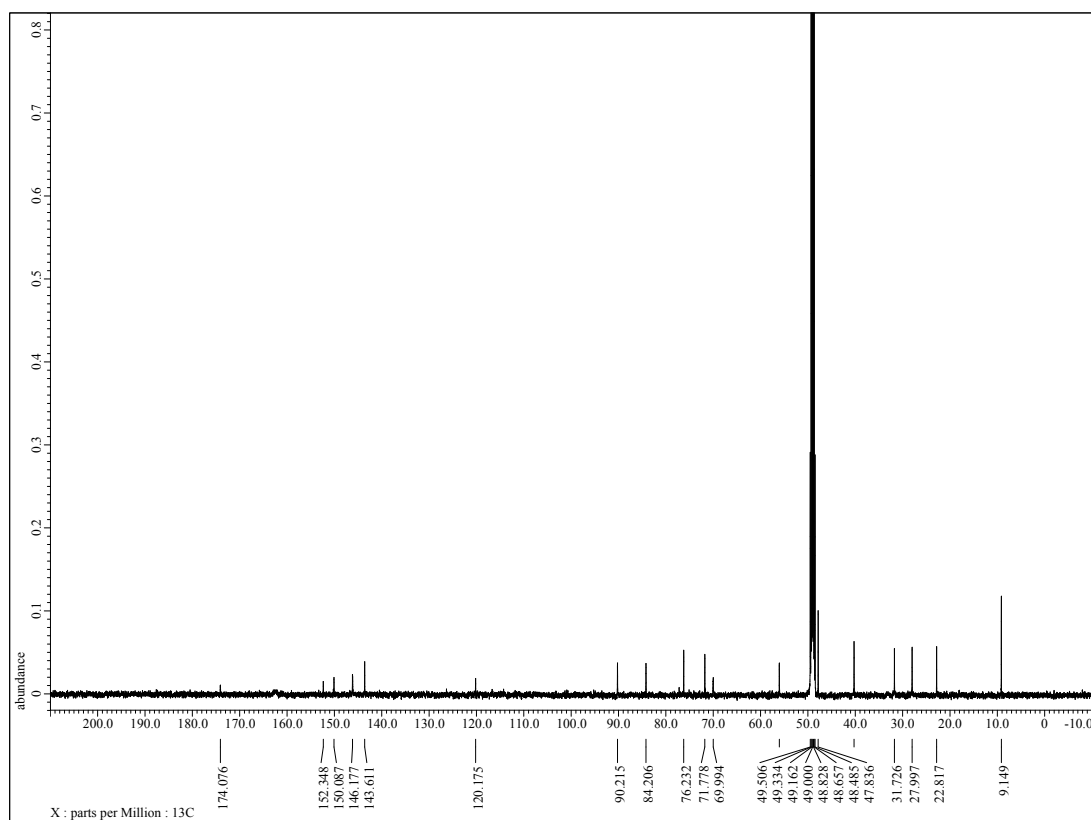

$^1\text{H}$ -NMR (500 MHz) and  $^{13}\text{C}$ -NMR (125 MHz) spectra of **S2n**

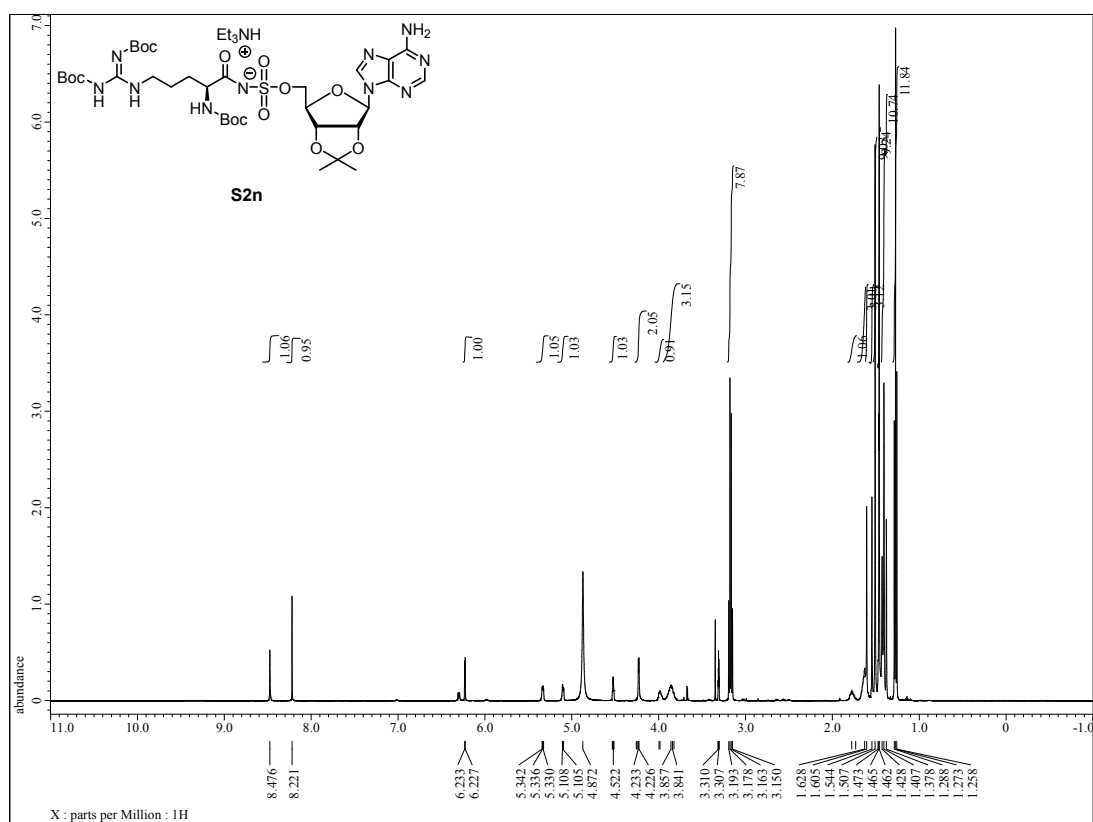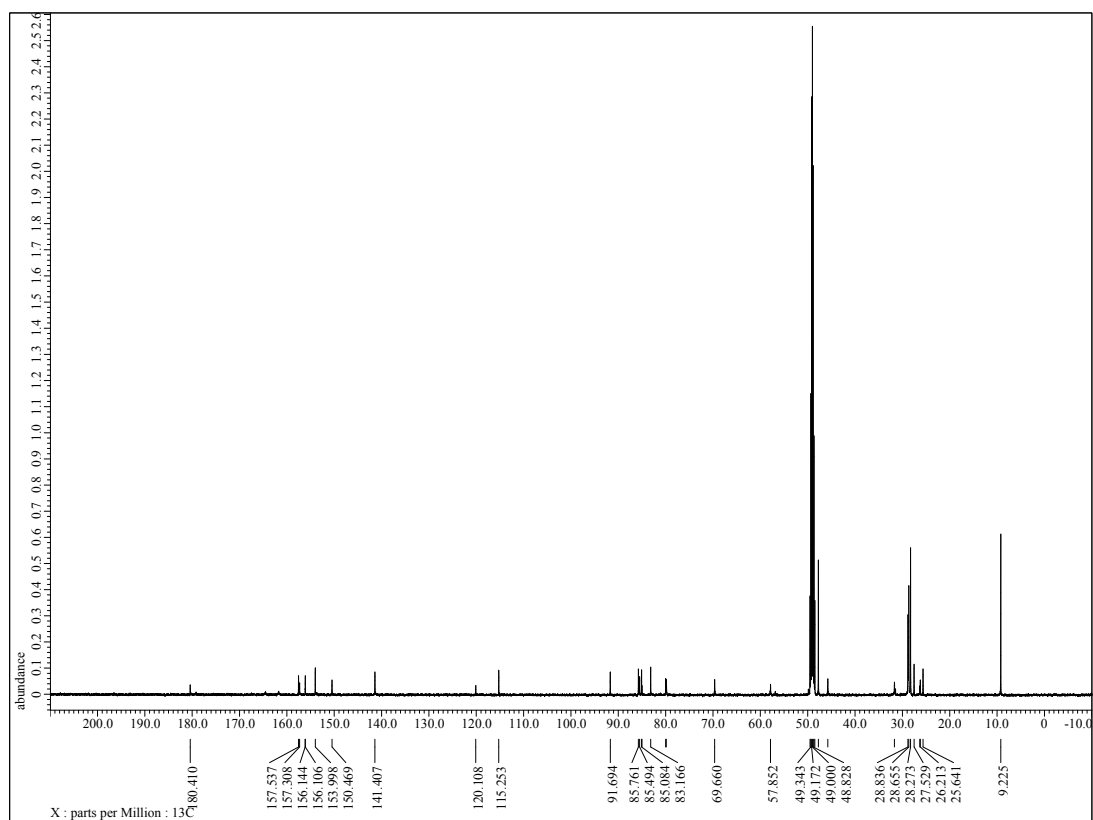

$^1\text{H}$ -NMR (500 MHz) and  $^{13}\text{C}$ -NMR (125 MHz) spectra of **24**

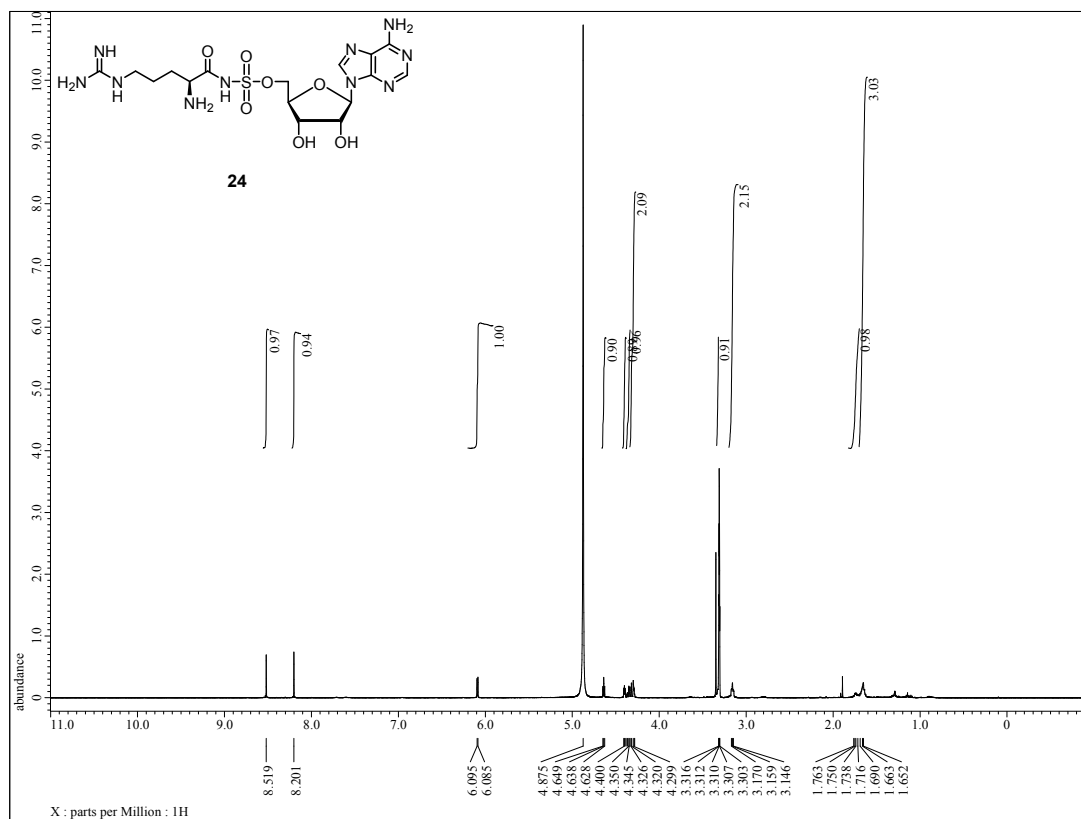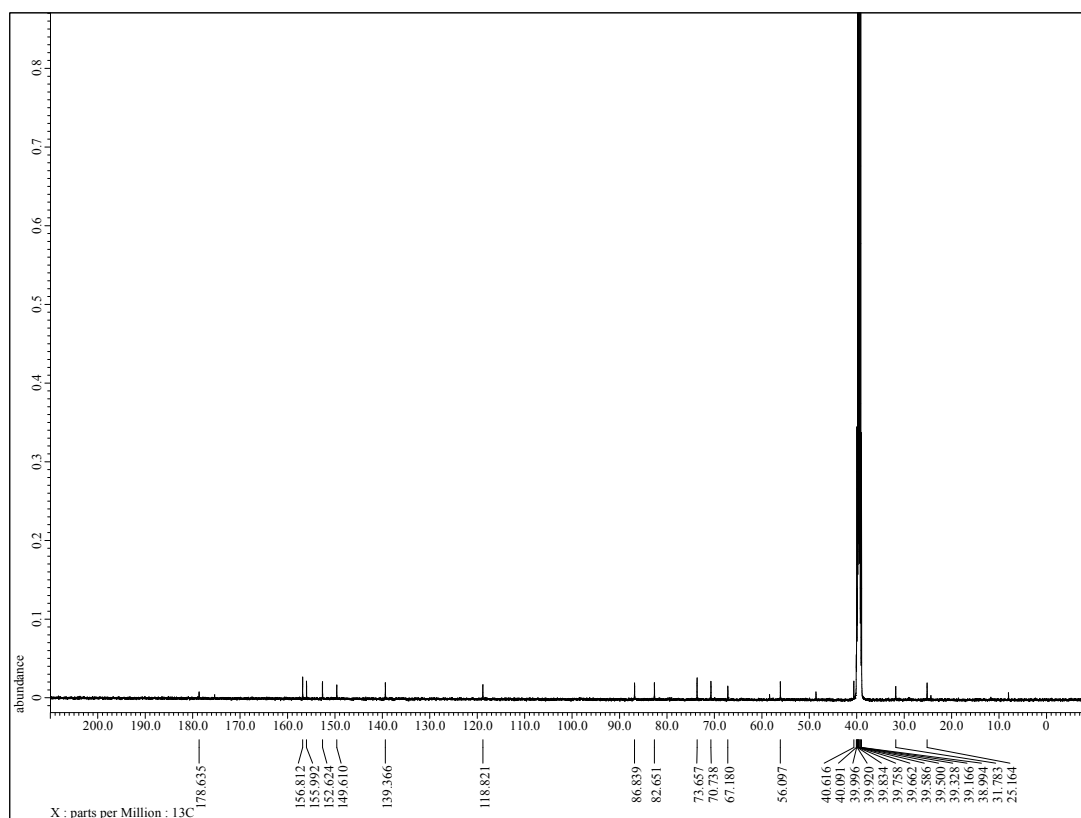

<sup>1</sup>H-NMR (500 MHz) and <sup>13</sup>C-NMR (125 MHz) spectra of **S2o**

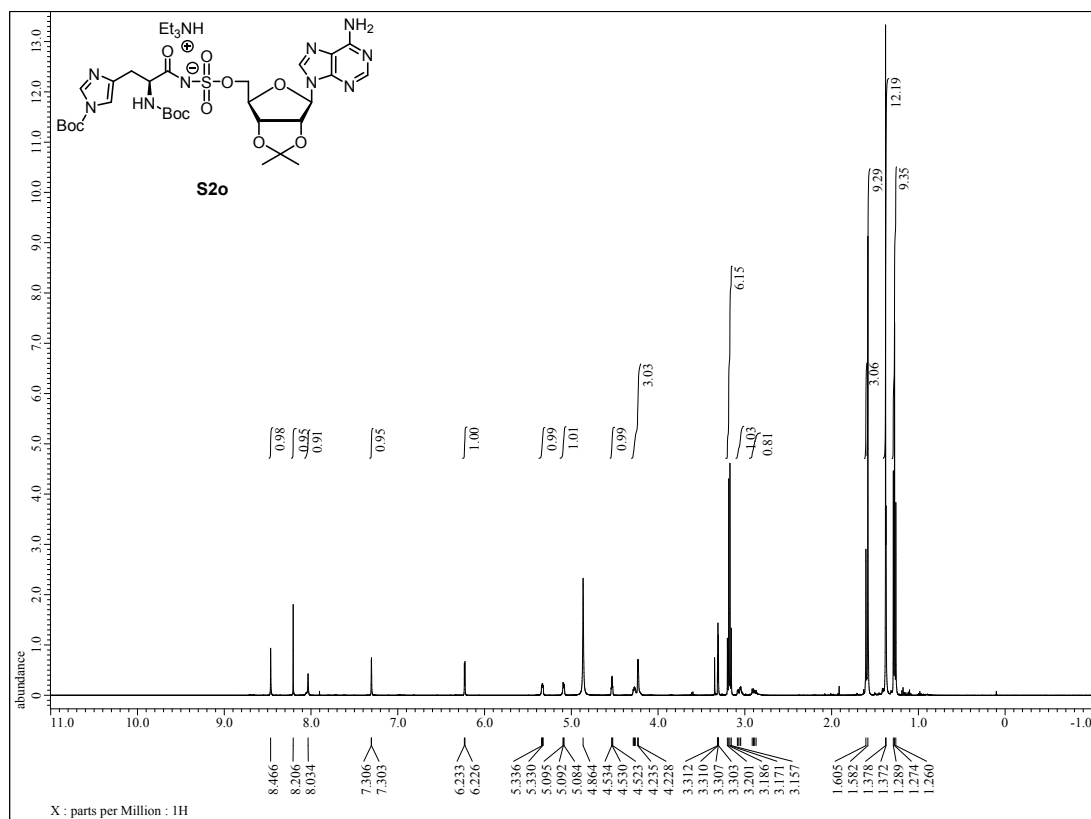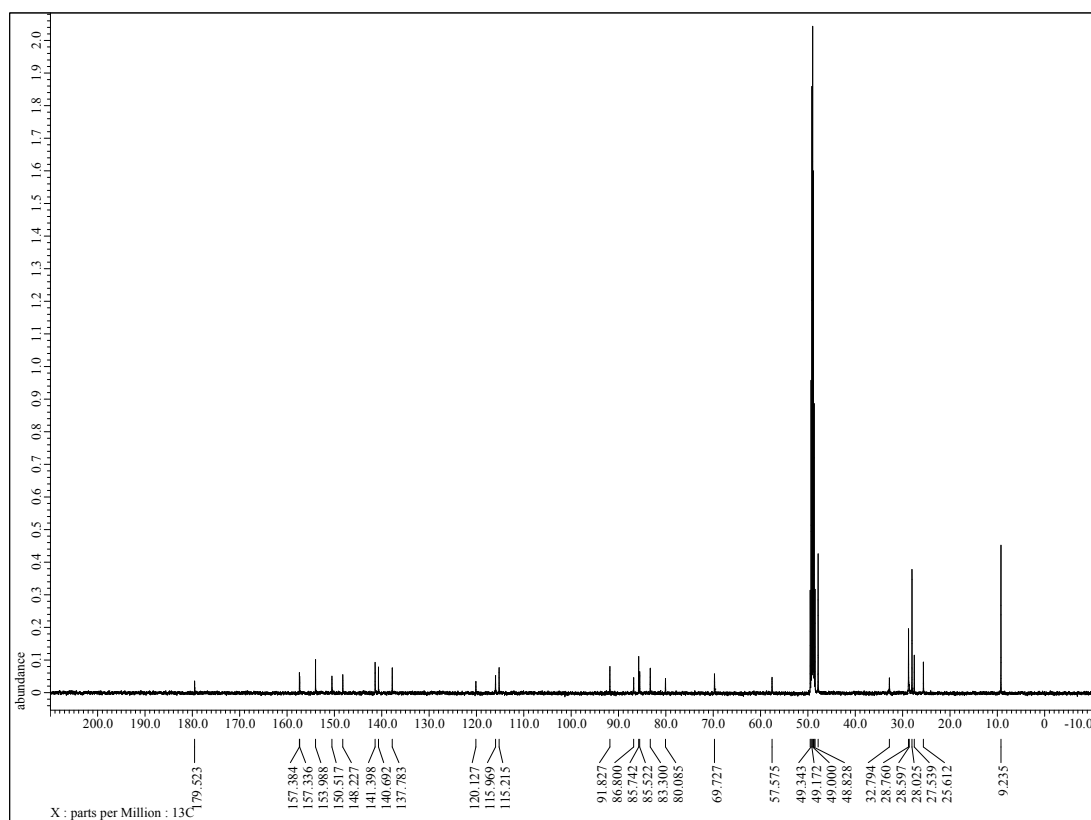

<sup>1</sup>H-NMR (500 MHz) and <sup>13</sup>C-NMR (125 MHz) spectra of **25**

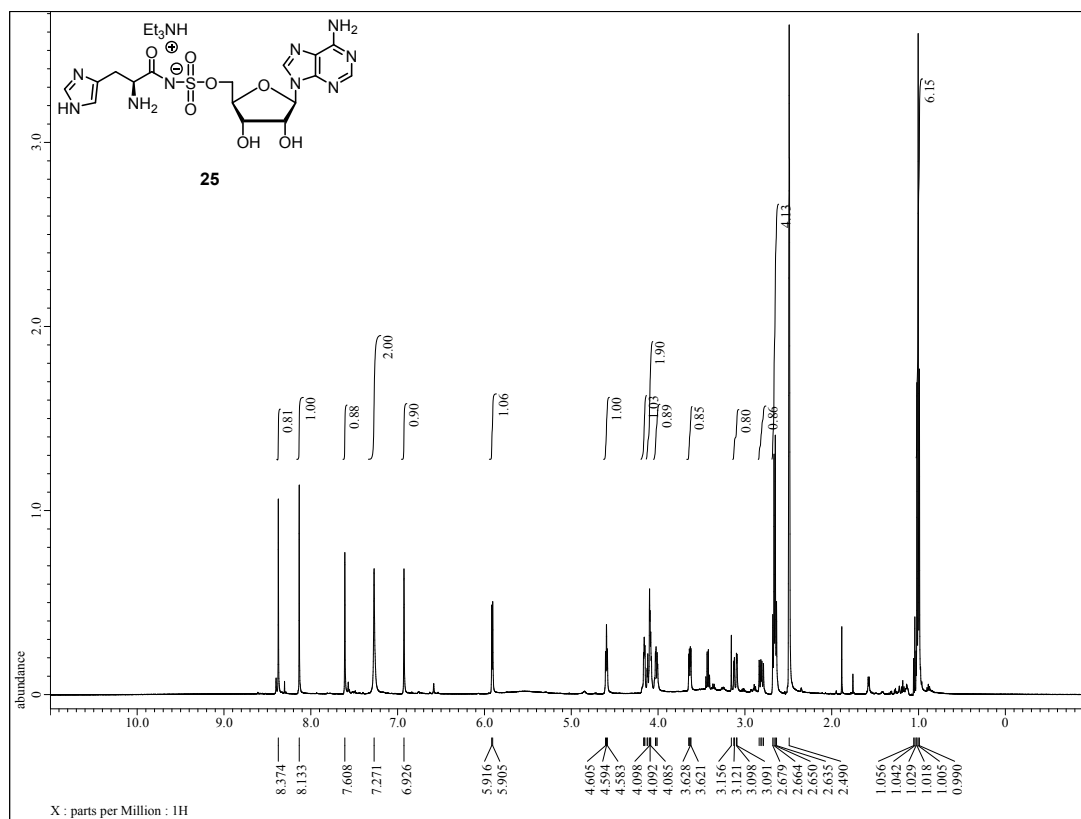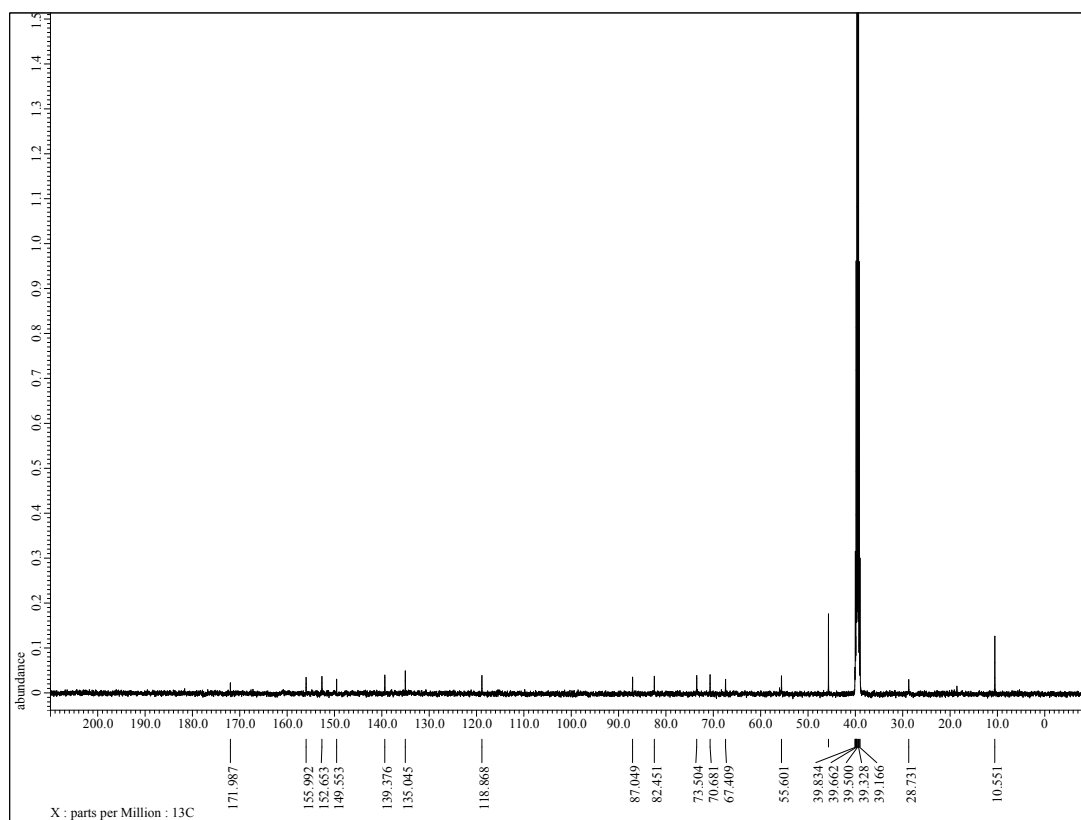

Supplement: c5cc04953a1.pdf [file c5cc04953a1.pdf]
